# Supplementary material for: Chemical Constituents from Soft Coral Clavularia spp. Demonstrate Antiproliferative Effects on Oral Cancer Cells
Source: MDPI journal article supplement (doi:10.3390/md21100529), 2023-10-08
Supplement: s1 [file s1]

## Supporting Information

### Chemical Constituents from Soft Coral *Clavularia* spp. Demonstrate Antiproliferative Effects on Oral Cancer Cells

Ming-Ya Cheng, Ya-Ting Chuang, Hsueh-Wei Chang, Zheng-Yu Lin, Ching-Yeu Chen, and Yuan-Bin Cheng\*

#### Corresponding Author

**Yuan-Bin Cheng** – Department of Marine Biotechnology and Resources, National Sun Yat-sen University, Kaohsiung 80424, Taiwan; orcid.org/0000-0001-6581-1320; E-mail: jmb@mail.nsysu.edu.tw; Tel: +886-7-5252-000-5212

#### Authors

**Ming-Ya Cheng** – Department of Marine Biotechnology and Resources, National Sun Yat-sen University, Kaohsiung 80424, Taiwan

**Ya-Ting Chuang** – Department of Biomedical Science and Environmental Biology, PhD program of Life Science, College of Life Science, Kaohsiung Medical University, Kaohsiung 80708, Taiwan

**Hsueh-Wei Chang** – Department of Biomedical Science and Environmental Biology, PhD program of Life Science, College of Life Science, Kaohsiung Medical University, Kaohsiung 80708, Taiwan; Center for Cancer Research, Kaohsiung Medical University, Kaohsiung 80708, Taiwan; Department of Medical Research, Kaohsiung Medical University Hospital, Kaohsiung 80708, Taiwan

**Zheng-Yu Lin** – Department of Marine Biotechnology and Resources, National Sun Yat-sen University, Kaohsiung 80424, Taiwan

**Yu-Chi Lin** – Department of Physical Therapy, Tzu-Hui Institute of Technology, Pingtung 92641, Taiwan

## Content

|                                                                                                                                                                                                                                                                                       |    |
|---------------------------------------------------------------------------------------------------------------------------------------------------------------------------------------------------------------------------------------------------------------------------------------|----|
| <b>Table S1</b> Energy analyses of 1 <i>R</i> ,4 <i>S</i> ,5 <i>R</i> ,8 <i>S</i> ,10 <i>S</i> - <b>5</b> (seven conformers).....                                                                                                                                                     | 6  |
| <b>Table S2</b> Cartesian coordinates of the low-energy re-optimized conformers of 1 <i>R</i> ,4 <i>S</i> ,5 <i>R</i> ,8 <i>S</i> ,10 <i>S</i> - <b>5</b> calculated at B3LYP/6-31G(d,p) level of theory. ....                                                                        | 8  |
| <b>Table S3</b> Energy analyses of 1 <i>S</i> ,4 <i>R</i> ,5 <i>S</i> ,8 <i>S</i> ,10 <i>R</i> - <b>5</b> (eight conformers) .....                                                                                                                                                    | 15 |
| <b>Table S4</b> Cartesian coordinates of the low-energy re-optimized conformers of 1 <i>S</i> ,4 <i>R</i> ,5 <i>S</i> ,8 <i>S</i> ,10 <i>R</i> - <b>5</b> calculated at B3LYP/6-31G(d,p) level of theory. ....                                                                        | 17 |
| <b>Table S5</b> Experimental and calculated <sup>1</sup> H NMR data for compound <b>5</b> .....                                                                                                                                                                                       | 24 |
| <b>Table S6</b> Experimental and calculated <sup>13</sup> C NMR data for compound <b>5</b> .....                                                                                                                                                                                      | 25 |
| <b>Table S7</b> DP4+ analyses of calculated and experimental NMR chemical shifts of <b>5</b> (unscaled). Isomer 1: 1 <i>R</i> ,4 <i>S</i> ,5 <i>R</i> ,8 <i>S</i> ,10 <i>S</i> - <b>5</b> ; Isomer 2: 1 <i>S</i> ,4 <i>R</i> ,5 <i>S</i> ,8 <i>S</i> ,10 <i>R</i> - <b>5</b> ....     | 26 |
| <b>Table S8</b> Energy analyses of 1 <i>R</i> ,7 <i>R</i> ,8 <i>R</i> ,10 <i>S</i> ,12 <i>R</i> - <b>6</b> (six conformers).....                                                                                                                                                      | 27 |
| <b>Table S9</b> Cartesian coordinates of the low-energy re-optimized conformers of 1 <i>R</i> ,7 <i>R</i> ,8 <i>R</i> ,10 <i>S</i> ,12 <i>R</i> - <b>6</b> calculated at B3LYP/6-31G(d,p) level of theory .....                                                                       | 29 |
| <b>Table S10</b> Energy analyses of 1 <i>R</i> ,7 <i>R</i> ,8 <i>S</i> ,10 <i>S</i> ,12 <i>R</i> - <b>6</b> (eight conformers).....                                                                                                                                                   | 35 |
| <b>Table S11</b> Cartesian coordinates of the low-energy re-optimized conformers of 1 <i>R</i> ,7 <i>R</i> ,8 <i>S</i> ,10 <i>S</i> ,12 <i>R</i> - <b>6</b> calculated at B3LYP/6-31G(d,p) level of theory. ....                                                                      | 37 |
| <b>Table S12</b> Experimental and calculated <sup>1</sup> H NMR data for compound <b>6</b> .....                                                                                                                                                                                      | 45 |
| <b>Table S13</b> Experimental and calculated <sup>13</sup> C NMR data for compound <b>6</b> .....                                                                                                                                                                                     | 46 |
| <b>Table S14</b> DP4+ analyses of calculated and experimental NMR chemical shifts of <b>6</b> (unscaled). Isomer 1: 1 <i>R</i> ,7 <i>R</i> ,8 <i>S</i> ,10 <i>R</i> ,12 <i>R</i> - <b>6</b> ; Isomer 2: 1 <i>R</i> ,7 <i>R</i> ,8 <i>S</i> ,10 <i>S</i> ,12 <i>R</i> - <b>6</b> ..... | 47 |
| <b>Table S15</b> Energy analyses of 1 <i>R</i> ,7 <i>R</i> ,8 <i>S</i> ,10 <i>R</i> - <b>8</b> (four conformers) .....                                                                                                                                                                | 48 |
| <b>Table S16</b> Cartesian coordinates of the low-energy re-optimized conformers of 1 <i>R</i> ,7 <i>R</i> ,8 <i>S</i> ,10 <i>R</i> - <b>8</b> calculated at B3LYP/6-31G(d,p) level of theory .....                                                                                   | 49 |
| <b>Table S17</b> Energy analyses of 1 <i>S</i> ,7 <i>S</i> ,8 <i>R</i> ,10 <i>S</i> - <b>8</b> (four conformers) .....                                                                                                                                                                | 53 |
| <b>Table S18</b> Cartesian coordinates of the low-energy re-optimized conformers of 1 <i>S</i> ,7 <i>S</i> ,8 <i>R</i> ,10 <i>S</i> - <b>8</b> calculated at B3LYP/6-31G(d,p) level of theory .....                                                                                   | 54 |
| <b>Table S19</b> Experimental and calculated <sup>1</sup> H NMR data for compound <b>8</b> .....                                                                                                                                                                                      | 58 |
| <b>Table S20</b> Experimental and calculated <sup>13</sup> C NMR data for compound <b>8</b> .....                                                                                                                                                                                     | 59 |
| <b>Table S21</b> DP4+ analyses of calculated and experimental NMR chemical shifts of <b>8</b> (unscaled). Isomer 1: 1 <i>R</i> ,7 <i>R</i> ,8 <i>S</i> ,10 <i>R</i> - <b>8</b> ; Isomer 2: 1 <i>S</i> ,7 <i>S</i> ,8 <i>R</i> ,10 <i>S</i> - <b>8</b> .....                           | 60 |

|                                                                                               |    |
|-----------------------------------------------------------------------------------------------|----|
| <b>Table S22</b> Cytotoxicity of active compounds against Human Oral Cancer (Ca9-22).....     | 61 |
| <b>Figure S1</b> Experimental ECD spectra of <b>1</b> and <b>9</b> .....                      | 62 |
| <b>Figure S2</b> NOESY (double arrow) correlations of <b>2</b> .....                          | 62 |
| <b>Figure S3</b> Experimental ECD spectra of <b>3</b> and <b>11</b> .....                     | 62 |
| <b>Figure S4</b> <sup>1</sup> H NMR spectrum of <b>1</b> (600 MHz, CDCl <sub>3</sub> ) .....  | 63 |
| <b>Figure S5</b> <sup>13</sup> C NMR spectrum of <b>1</b> (125 MHz, CDCl <sub>3</sub> ).....  | 63 |
| <b>Figure S6</b> COSY spectrum of <b>1</b> .....                                              | 64 |
| <b>Figure S7</b> HSQC spectrum of <b>1</b> .....                                              | 64 |
| <b>Figure S8</b> HMBC spectrum of <b>1</b> .....                                              | 65 |
| <b>Figure S9</b> NOESY spectrum of <b>1</b> .....                                             | 65 |
| <b>Figure S10</b> HRESIMS spectrum of <b>1</b> .....                                          | 66 |
| <b>Figure S11</b> UV spectrum of <b>1</b> .....                                               | 67 |
| <b>Figure S12</b> IR spectrum of <b>1</b> .....                                               | 67 |
| <b>Figure S13</b> <sup>1</sup> H NMR spectrum of <b>2</b> (600 MHz, CDCl <sub>3</sub> ) ..... | 68 |
| <b>Figure S14</b> <sup>13</sup> C NMR spectrum of <b>2</b> (125 MHz, CDCl <sub>3</sub> )..... | 68 |
| <b>Figure S15</b> COSY spectrum of <b>2</b> .....                                             | 69 |
| <b>Figure S16</b> HSQC spectrum of <b>2</b> .....                                             | 69 |
| <b>Figure S17</b> HMBC spectrum of <b>2</b> .....                                             | 70 |
| <b>Figure S18</b> NOESY spectrum of <b>2</b> .....                                            | 70 |
| <b>Figure S19</b> HRESIMS spectrum of <b>2</b> .....                                          | 71 |
| <b>Figure S20</b> UV spectrum of <b>2</b> .....                                               | 72 |
| <b>Figure S21</b> IR spectrum of <b>2</b> .....                                               | 72 |
| <b>Figure S22</b> <sup>1</sup> H NMR spectrum of <b>3</b> (600 MHz, CDCl <sub>3</sub> ) ..... | 73 |
| <b>Figure S23</b> <sup>13</sup> C NMR spectrum of <b>3</b> (125 MHz, CDCl <sub>3</sub> )..... | 73 |
| <b>Figure S24</b> COSY spectrum of <b>3</b> .....                                             | 74 |

|                                                                                               |    |
|-----------------------------------------------------------------------------------------------|----|
| <b>Figure S25</b> HSQC spectrum of <b>3</b> .....                                             | 74 |
| <b>Figure S26</b> HMBC spectrum of <b>3</b> .....                                             | 75 |
| <b>Figure S27</b> NOESY spectrum of <b>3</b> .....                                            | 75 |
| <b>Figure S28</b> HRESIMS spectrum of <b>3</b> .....                                          | 76 |
| <b>Figure S29</b> UV spectrum of <b>3</b> .....                                               | 77 |
| <b>Figure S30</b> IR spectrum of <b>3</b> .....                                               | 77 |
| <b>Figure S31</b> <sup>1</sup> H NMR spectrum of <b>4</b> (400 MHz, CDCl <sub>3</sub> ) ..... | 78 |
| <b>Figure S32</b> <sup>13</sup> C NMR spectrum of <b>4</b> (100 MHz, CDCl <sub>3</sub> )..... | 78 |
| <b>Figure S33</b> COSY spectrum of <b>4</b> .....                                             | 79 |
| <b>Figure S34</b> HSQC spectrum of <b>4</b> .....                                             | 79 |
| <b>Figure S35</b> HMBC spectrum of <b>4</b> .....                                             | 80 |
| <b>Figure S36</b> NOESY spectrum of <b>4</b> .....                                            | 80 |
| <b>Figure S37</b> HRESIMS spectrum of <b>4</b> .....                                          | 81 |
| <b>Figure S38</b> UV spectrum of <b>4</b> .....                                               | 82 |
| <b>Figure S39</b> IR spectrum of <b>4</b> .....                                               | 82 |
| <b>Figure S40</b> <sup>1</sup> H NMR spectrum of <b>5</b> (600 MHz, CDCl <sub>3</sub> ) ..... | 83 |
| <b>Figure S41</b> <sup>13</sup> C NMR spectrum of <b>5</b> (125 MHz, CDCl <sub>3</sub> )..... | 83 |
| <b>Figure S42</b> COSY spectrum of <b>5</b> .....                                             | 84 |
| <b>Figure S43</b> HSQC spectrum of <b>5</b> .....                                             | 84 |
| <b>Figure S44</b> HMBC spectrum of <b>5</b> .....                                             | 85 |
| <b>Figure S45</b> NOESY spectrum of <b>5</b> .....                                            | 85 |
| <b>Figure S46</b> HRESIMS spectrum of <b>5</b> .....                                          | 86 |
| <b>Figure S47</b> UV spectrum of <b>5</b> .....                                               | 87 |
| <b>Figure S48</b> IR spectrum of <b>5</b> .....                                               | 87 |
| <b>Figure S49</b> <sup>1</sup> H NMR spectrum of <b>6</b> (600 MHz, CDCl <sub>3</sub> ) ..... | 88 |
| <b>Figure S50</b> <sup>13</sup> C NMR spectrum of <b>6</b> (125 MHz, CDCl <sub>3</sub> )..... | 88 |

|                                                                                              |     |
|----------------------------------------------------------------------------------------------|-----|
| <b>Figure S51</b> COSY spectrum of <b>6</b> .....                                            | 89  |
| <b>Figure S52</b> HSQC spectrum of <b>6</b> .....                                            | 89  |
| <b>Figure S53</b> HMBC spectrum of <b>6</b> .....                                            | 90  |
| <b>Figure S54</b> NOESY spectrum of <b>6</b> .....                                           | 90  |
| <b>Figure S55</b> HRESIMS spectrum of <b>6</b> .....                                         | 91  |
| <b>Figure S56</b> UV spectrum of <b>6</b> .....                                              | 92  |
| <b>Figure S57</b> IR spectrum of <b>6</b> .....                                              | 92  |
| <b>Figure S58</b> $^1\text{H}$ NMR spectrum of <b>7</b> (400 MHz, $\text{CDCl}_3$ ) .....    | 93  |
| <b>Figure S59</b> $^{13}\text{C}$ NMR spectrum of <b>7</b> (100 MHz, $\text{CDCl}_3$ ) ..... | 93  |
| <b>Figure S60</b> COSY spectrum of <b>7</b> .....                                            | 94  |
| <b>Figure S61</b> HSQC spectrum of <b>7</b> .....                                            | 94  |
| <b>Figure S62</b> HMBC spectrum of <b>7</b> .....                                            | 95  |
| <b>Figure S63</b> NOESY spectrum of <b>7</b> .....                                           | 95  |
| <b>Figure S64</b> HRESIMS spectrum of <b>7</b> .....                                         | 96  |
| <b>Figure S65</b> UV spectrum of <b>7</b> .....                                              | 97  |
| <b>Figure S66</b> IR spectrum of <b>7</b> .....                                              | 97  |
| <b>Figure S67.</b> $^1\text{H}$ NMR spectrum of <b>8</b> (600 MHz, $\text{CDCl}_3$ ) .....   | 98  |
| <b>Figure S68</b> $^{13}\text{C}$ NMR spectrum of <b>8</b> (125 MHz, $\text{CDCl}_3$ ) ..... | 98  |
| <b>Figure S69</b> COSY spectrum of <b>8</b> .....                                            | 99  |
| <b>Figure S70</b> HSQC spectrum of <b>8</b> .....                                            | 99  |
| <b>Figure S71</b> HMBC spectrum of <b>8</b> .....                                            | 100 |
| <b>Figure S72</b> NOESY spectrum of <b>8</b> .....                                           | 100 |
| <b>Figure S73</b> HRESIMS spectrum of <b>8</b> .....                                         | 101 |
| <b>Figure S74</b> UV spectrum of <b>8</b> .....                                              | 102 |
| <b>Figure S75</b> IR spectrum of <b>8</b> .....                                              | 102 |

**Table S1** Energy analyses of 1*R*,4*S*,5*R*,8*S*,10*S*-**5** (seven conformers)

| NO.                                                                                     | 3D conformers<br>B3LYP/6-31G(d,p)                                                   | E (Hartree)  | $\Delta E$<br>(KJ/mol) | Boltzmann<br>distribution |
|-----------------------------------------------------------------------------------------|-------------------------------------------------------------------------------------|--------------|------------------------|---------------------------|
| 1 <i>R</i> ,4 <i>S</i> ,5 <i>R</i> ,8 <i>S</i> ,10 <i>S</i> - <b>5</b><br>(conformer 1) | 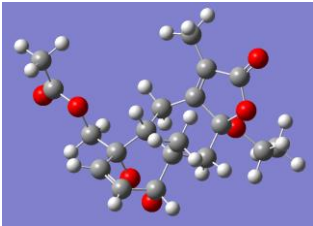   | -1264.568384 | 2.31831548             | 27.52%                    |
| 1 <i>R</i> ,4 <i>S</i> ,5 <i>R</i> ,8 <i>S</i> ,10 <i>S</i> - <b>5</b><br>(conformer 2) |   | -1264.563209 | 15.905272              | 0.11%                     |
| 1 <i>R</i> ,4 <i>S</i> ,5 <i>R</i> ,8 <i>S</i> ,10 <i>S</i> - <b>5</b><br>(conformer 3) |  | -1264.563995 | 13.84162991            | 0.26%                     |
| 1 <i>R</i> ,4 <i>S</i> ,5 <i>R</i> ,8 <i>S</i> ,10 <i>S</i> - <b>5</b><br>(conformer 4) |  | -1264.563230 | 15.85013653            | 0.12%                     |

---

1*R*,4*S*,5*R*,8*S*,10*S*-**5**  
(conformer 5)

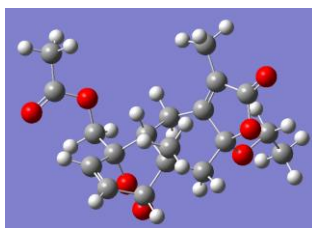

-1264.569267      0      70.12%

---

1*R*,4*S*,5*R*,8*S*,10*S*-**5**  
(conformer 6)

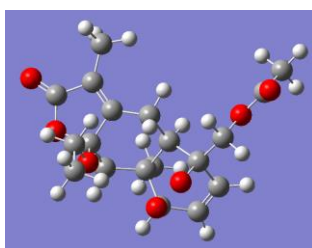

-1264.565610    9.601449275    1.46%

---

1*R*,4*S*,5*R*,8*S*,10*S*-**5**  
(conformer 7)

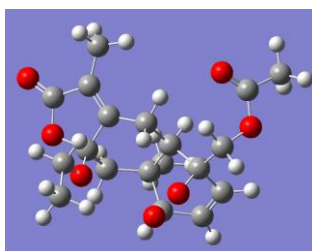

-1264.564414    12.74154589    0.41%

---

**Table S2** Cartesian coordinates of the low-energy re-optimized conformers of **1*R*,4*S*,5*R*,8*S*,10*S*-5** calculated at B3LYP/6-31G(d,p) level of theory.

| 1 <i>R</i> ,4 <i>S</i> ,5 <i>R</i> ,8 <i>S</i> ,10 <i>S</i> -5 (conformer 1) |                           |           |           |        |                           |           |           |
|------------------------------------------------------------------------------|---------------------------|-----------|-----------|--------|---------------------------|-----------|-----------|
| Atomic                                                                       | Standard Orientation (Å ) |           |           | Atomic | Standard Orientation (Å ) |           |           |
| Type                                                                         | X                         | Y         | Z         | Type   | X                         | Y         | Z         |
| C                                                                            | -1.729375                 | -2.5384   | 1.124891  | H      | 1.483165                  | -1.928645 | -0.484878 |
| C                                                                            | -2.571663                 | -1.755794 | 1.124891  | H      | 2.372164                  | -1.813036 | 1.035669  |
| C                                                                            | -1.929956                 | -1.093283 | -0.072254 | H      | -0.393706                 | -0.615566 | 3.151261  |
| C                                                                            | -0.744147                 | -0.211507 | 0.414901  | H      | 1.210964                  | -1.375316 | 3.123082  |
| C                                                                            | 0.299229                  | -1.161384 | 1.147177  | H      | 1.017151                  | 0.300801  | 2.602778  |
| C                                                                            | -0.362124                 | -2.57292  | 1.169931  | H      | 0.073187                  | 3.641043  | 0.009474  |
| C                                                                            | -0.125424                 | 0.658086  | -0.718521 | H      | 0.939344                  | 3.846636  | 1.551095  |
| C                                                                            | 1.205834                  | 1.10365   | -0.227957 | H      | 1.703988                  | 4.343956  | 0.04919   |
| C                                                                            | 2.255567                  | 0.021529  | -0.12201  | H      | -2.471358                 | -0.032336 | -1.900929 |
| C                                                                            | 1.650264                  | -1.298367 | 0.391621  | H      | -3.743433                 | -1.076423 | -1.254364 |
| C                                                                            | 1.661357                  | 2.225443  | 0.343722  | H      | 5.315012                  | -1.572163 | -3.080365 |
| C                                                                            | 2.983775                  | 1.909758  | 0.956496  | H      | 3.694491                  | -1.142568 | -3.670774 |
| O                                                                            | 3.244063                  | 0.565941  | 0.776075  | H      | 4.806185                  | 0.130813  | -3.128611 |
| C                                                                            | 0.544213                  | -0.685435 | 2.590782  | H      | 4.693712                  | -0.760848 | -0.782807 |
| O                                                                            | 3.719596                  | 2.6354    | 1.576649  | H      | 3.596792                  | -2.050028 | -1.329505 |
| C                                                                            | 1.052575                  | 3.582019  | 0.493103  | H      | -5.317629                 | 2.157765  | 0.972736  |
| C                                                                            | -2.937602                 | -0.390301 | -0.980193 | H      | -4.101985                 | 3.228284  | 0.27355   |
| O                                                                            | -1.388033                 | -2.123791 | -0.945408 | H      | -5.715316                 | 3.109203  | -0.488944 |
| O                                                                            | -0.521151                 | -3.048866 | -0.189458 |        |                           |           |           |
| O                                                                            | 2.822346                  | -0.111667 | -1.405195 |        |                           |           |           |
| C                                                                            | 4.467857                  | -0.892328 | -2.937288 |        |                           |           |           |
| C                                                                            | 3.927588                  | -1.019612 | -1.523121 |        |                           |           |           |
| O                                                                            | -3.467108                 | 0.718365  | -0.230669 |        |                           |           |           |
| O                                                                            | -4.85172                  | 1.16875   | -1.960908 |        |                           |           |           |
| C                                                                            | -4.447491                 | 1.430508  | -0.852487 |        |                           |           |           |
| C                                                                            | -4.931236                 | 2.556387  | 0.029004  |        |                           |           |           |
| H                                                                            | -1.989983                 | -3.141636 | 2.66472   |        |                           |           |           |
| H                                                                            | -3.622836                 | -1.610371 | 1.354641  |        |                           |           |           |
| H                                                                            | -1.145467                 | 0.482678  | 1.159609  |        |                           |           |           |
| H                                                                            | 0.30744                   | -3.320297 | 1.606886  |        |                           |           |           |
| H                                                                            | -0.002582                 | 0.058611  | -1.628594 |        |                           |           |           |
| H                                                                            | -0.788697                 | 1.498064  | -0.944715 |        |                           |           |           |

| 1 <i>R</i> ,4 <i>S</i> ,5 <i>R</i> ,8 <i>S</i> ,10 <i>S</i> -5 (conformer 2) |                           |           |           |        |                           |           |           |
|------------------------------------------------------------------------------|---------------------------|-----------|-----------|--------|---------------------------|-----------|-----------|
| Atomic                                                                       | Standard Orientation (Å ) |           |           | Atomic | Standard Orientation (Å ) |           |           |
| Type                                                                         | X                         | Y         | Z         | Type   | X                         | Y         | Z         |
| C                                                                            | -1.940982                 | -2.250766 | 1.51976   | H      | 2.02092                   | -1.675424 | 1.53728   |
| C                                                                            | -2.655418                 | -1.459736 | 0.719216  | H      | 1.998282                  | -0.063443 | 2.205588  |
| C                                                                            | -1.798167                 | -0.716079 | -0.280429 | H      | -1.376412                 | -0.270153 | 3.087152  |
| C                                                                            | -0.750076                 | 0.202735  | 0.42927   | H      | 0.189795                  | -0.884569 | 3.649735  |
| C                                                                            | 0.053576                  | -0.697111 | 1.467914  | H      | 0.050592                  | 0.78084   | 3.068209  |
| C                                                                            | -0.465577                 | -2.14807  | 1.247506  | H      | 0.990942                  | 3.916651  | -0.620202 |
| C                                                                            | 0.07681                   | 0.977188  | -0.644212 | H      | 2.30814                   | 4.308641  | 0.51173   |
| C                                                                            | 1.487856                  | 1.198226  | -0.245466 | H      | 2.662726                  | 4.089729  | -1.195291 |
| C                                                                            | 2.249411                  | -0.048821 | 0.119599  | H      | -1.992257                 | 0.27421   | -2.207714 |
| C                                                                            | 1.621101                  | -0.668764 | 1.376586  | H      | -3.413559                 | -0.687391 | -1.72526  |
| C                                                                            | 2.287508                  | 2.266286  | -0.135019 | H      | 3.652212                  | -3.605638 | -2.326908 |
| C                                                                            | 3.629406                  | 1.782736  | 0.295722  | H      | 2.133173                  | -2.796542 | -2.772668 |
| O                                                                            | 3.578436                  | 0.414938  | 0.454991  | H      | 3.682866                  | -1.949488 | -2.974806 |
| C                                                                            | -0.299059                 | -0.244926 | 2.903435  | H      | 3.99003                   | -1.924199 | -0.480886 |
| O                                                                            | 4.627574                  | 2.425207  | 0.509554  | H      | 2.446955                  | -2.803701 | -0.296938 |
| C                                                                            | 2.038339                  | 3.720432  | -0.372998 | H      | -6.023641                 | 2.531563  | 0.17994   |
| C                                                                            | -2.626328                 | -0.020398 | -1.371215 | H      | -4.365125                 | 2.904503  | 0.740303  |
| O                                                                            | -1.052906                 | -1.711569 | -1.036487 | H      | -4.827544                 | 3.278276  | -0.920587 |
| O                                                                            | -0.22374                  | -2.531025 | -0.12975  |        |                           |           |           |
| O                                                                            | 2.290887                  | -0.856617 | -1.016315 |        |                           |           |           |
| C                                                                            | 3.126214                  | -2.644554 | -2.338318 |        |                           |           |           |
| C                                                                            | 3.003139                  | -2.098472 | -0.92628  |        |                           |           |           |
| O                                                                            | -3.205769                 | 1.196612  | -0.862338 |        |                           |           |           |
| O                                                                            | -5.235862                 | 0.207311  | -0.606229 |        |                           |           |           |
| C                                                                            | -4.529224                 | 1.187311  | -0.540902 |        |                           |           |           |
| C                                                                            | -4.971653                 | 2.562551  | -0.104539 |        |                           |           |           |
| H                                                                            | -2.352244                 | -2.932457 | 2.257818  |        |                           |           |           |
| H                                                                            | -3.738247                 | -1.395356 | 0.688051  |        |                           |           |           |
| H                                                                            | -1.307293                 | 0.945954  | 1.006954  |        |                           |           |           |
| H                                                                            | 0.132148                  | -2.874778 | 1.805973  |        |                           |           |           |
| H                                                                            | 0.11963                   | 0.361761  | -1.551455 |        |                           |           |           |
| H                                                                            | -0.432304                 | 1.91356   | -0.891213 |        |                           |           |           |

| 1 <i>R</i> ,4 <i>S</i> ,5 <i>R</i> ,8 <i>S</i> ,10 <i>S</i> -5 (conformer 3) |                           |           |           |        |                           |           |           |
|------------------------------------------------------------------------------|---------------------------|-----------|-----------|--------|---------------------------|-----------|-----------|
| Atomic                                                                       | Standard Orientation (Å ) |           |           | Atomic | Standard Orientation (Å ) |           |           |
| Type                                                                         | X                         | Y         | Z         | Type   | X                         | Y         | Z         |
| C                                                                            | -1.602693                 | -2.689494 | 1.493784  | H      | 2.279612                  | -1.750881 | 1.230385  |
| C                                                                            | -2.454084                 | -1.870525 | 0.877386  | H      | 2.195207                  | -0.245598 | 2.109507  |
| C                                                                            | -1.768767                 | -0.930365 | -0.086827 | H      | -1.042589                 | -0.880062 | 3.261268  |
| C                                                                            | -0.734717                 | -0.014609 | 0.646863  | H      | 0.617594                  | -1.414485 | 3.588018  |
| C                                                                            | 0.242696                  | -0.960875 | 1.474384  | H      | 0.286296                  | 0.291599  | 3.255611  |
| C                                                                            | -0.175922                 | -2.414054 | 1.103653  | H      | 0.589916                  | 3.951906  | -0.038942 |
| C                                                                            | -0.088662                 | 0.968489  | -0.378952 | H      | 1.984893                  | 4.314087  | 1.006439  |
| C                                                                            | 1.335234                  | 1.263973  | -0.087978 | H      | 2.172639                  | 4.34858   | -0.740387 |
| C                                                                            | 2.226678                  | 0.055812  | 0.030069  | H      | -2.276242                 | 0.389769  | -1.759513 |
| C                                                                            | 1.784806                  | -0.774142 | 1.244541  | H      | -3.43849                  | -0.907325 | -1.463133 |
| C                                                                            | 2.055445                  | 2.378113  | 0.091827  | H      | 3.632285                  | -3.01724  | -3.001442 |
| C                                                                            | 3.469083                  | 1.968826  | 0.324895  | H      | 2.008623                  | -2.312876 | -3.172152 |
| O                                                                            | 3.54283                   | 0.59298   | 0.29935   | H      | 3.447076                  | -1.299937 | -3.425683 |
| C                                                                            | 0.00466                   | -0.732439 | 2.984511  | H      | 4.044094                  | -1.547084 | -0.996648 |
| O                                                                            | 4.430387                  | 2.667476  | 0.530751  | H      | 2.612703                  | -2.589068 | -0.766772 |
| C                                                                            | 1.669618                  | 3.821774  | 0.079231  | H      | -6.000044                 | 2.840727  | -0.230176 |
| C                                                                            | -2.768262                 | -0.191951 | -0.978306 | H      | -5.667468                 | 1.653482  | 1.065686  |
| O                                                                            | -1.028202                 | -1.745485 | -1.036024 | H      | -4.516957                 | 2.956482  | 0.762861  |
| O                                                                            | -0.044994                 | -2.589983 | -0.328716 |        |                           |           |           |
| O                                                                            | 2.210939                  | -0.593506 | -1.203673 |        |                           |           |           |
| C                                                                            | 3.029904                  | -2.118165 | -2.830267 |        |                           |           |           |
| C                                                                            | 3.029683                  | -1.761737 | -1.353774 |        |                           |           |           |
| O                                                                            | -3.519953                 | 0.67951   | -0.113865 |        |                           |           |           |
| O                                                                            | -4.735903                 | 1.332635  | -1.90491  |        |                           |           |           |
| C                                                                            | -4.501008                 | 1.40222   | -0.721409 |        |                           |           |           |
| C                                                                            | -5.222                    | 2.27211   | 0.279721  |        |                           |           |           |
| H                                                                            | -1.878629                 | -3.489231 | 2.173994  |        |                           |           |           |
| H                                                                            | -3.535354                 | -1.890229 | 0.973743  |        |                           |           |           |
| H                                                                            | -1.292624                 | 0.587989  | 1.369272  |        |                           |           |           |
| H                                                                            | 0.532606                  | -3.147202 | 1.500706  |        |                           |           |           |
| H                                                                            | -0.096782                 | 0.488564  | -1.365571 |        |                           |           |           |
| H                                                                            | -0.689344                 | 1.881241  | -0.440496 |        |                           |           |           |

| 1 <i>R</i> ,4 <i>S</i> ,5 <i>R</i> ,8 <i>S</i> ,10 <i>S</i> - <b>5</b> (conformer 4) |                           |           |           |        |                           |           |           |
|--------------------------------------------------------------------------------------|---------------------------|-----------|-----------|--------|---------------------------|-----------|-----------|
| Atomic                                                                               | Standard Orientation (Å ) |           |           | Atomic | Standard Orientation (Å ) |           |           |
| Type                                                                                 | X                         | Y         | Z         | Type   | X                         | Y         | Z         |
| C                                                                                    | -1.783759                 | -2.6785   | 1.332878  | H      | 2.07927                   | -1.645468 | 1.52729   |
| C                                                                                    | -2.590844                 | -1.898829 | 0.61414   | H      | 1.848206                  | -0.064877 | 2.229555  |
| C                                                                                    | -1.837493                 | -0.982855 | -0.324262 | H      | -1.475557                 | -0.777557 | 3.044133  |
| C                                                                                    | -0.87051                  | -0.018225 | 0.441144  | H      | 0.142484                  | -1.262188 | 3.585558  |
| C                                                                                    | 0.013504                  | -0.906765 | 1.424088  | H      | -0.17415                  | 0.420619  | 3.140302  |
| C                                                                                    | -0.333111                 | -2.382914 | 1.069209  | H      | 0.496836                  | 3.878863  | -0.434452 |
| C                                                                                    | -0.115071                 | 0.881137  | -0.588697 | H      | 1.767111                  | 4.359683  | 0.71774   |
| C                                                                                    | 1.267702                  | 1.214651  | -0.170199 | H      | 2.142492                  | 4.244123  | -0.995016 |
| C                                                                                    | 2.148165                  | 0.037838  | 0.155005  | H      | -2.268685                 | 0.429337  | -1.953502 |
| C                                                                                    | 1.567188                  | -0.688909 | 1.37645   | H      | -3.202566                 | -1.090256 | -1.980231 |
| C                                                                                    | 1.954698                  | 2.352616  | -0.007032 | H      | 3.926775                  | -3.267415 | -2.39818  |
| C                                                                                    | 3.333445                  | 1.989914  | 0.424189  | H      | 2.323592                  | -2.618762 | -2.813061 |
| O                                                                                    | 3.41858                   | 0.617595  | 0.531827  | H      | 3.76923                   | -1.602487 | -3.003863 |
| C                                                                                    | -0.405944                 | -0.619617 | 2.884407  | H      | 4.094862                  | -1.60704  | -0.510629 |
| O                                                                                    | 4.260541                  | 2.718396  | 0.678737  | H      | 2.659064                  | -2.65268  | -0.340986 |
| C                                                                                    | 1.558444                  | 3.781897  | -0.190125 | H      | -5.187654                 | 3.173104  | 0.246354  |
| C                                                                                    | -2.776785                 | -0.313254 | -1.340875 | H      | -6.068302                 | 1.779867  | -0.446349 |
| O                                                                                    | -1.010996                 | -1.835019 | -1.166245 | H      | -5.268862                 | 1.610202  | 1.116967  |
| O                                                                                    | -0.061306                 | -2.604459 | -0.337937 |        |                           |           |           |
| O                                                                                    | 2.287582                  | -0.715922 | -1.01032  |        |                           |           |           |
| C                                                                                    | 3.298218                  | -2.370056 | -2.381729 |        |                           |           |           |
| C                                                                                    | 3.128925                  | -1.874682 | -0.955822 |        |                           |           |           |
| O                                                                                    | -3.889804                 | 0.292604  | -0.655752 |        |                           |           |           |
| O                                                                                    | -3.074338                 | 2.386765  | -0.998089 |        |                           |           |           |
| C                                                                                    | -3.930663                 | 1.64901   | -0.564991 |        |                           |           |           |
| C                                                                                    | -5.193324                 | 2.088559  | 0.13534   |        |                           |           |           |
| H                                                                                    | -2.106843                 | -3.460459 | 2.013114  |        |                           |           |           |
| H                                                                                    | -3.675093                 | -1.939614 | 0.612231  |        |                           |           |           |
| H                                                                                    | -1.483319                 | 0.64183   | 1.06431   |        |                           |           |           |
| H                                                                                    | 0.349877                  | -3.084067 | 1.558135  |        |                           |           |           |
| H                                                                                    | -0.018425                 | 0.314881  | -1.523932 |        |                           |           |           |
| H                                                                                    | -0.709144                 | 1.774596  | -0.79195  |        |                           |           |           |

| 1 <i>R</i> ,4 <i>S</i> ,5 <i>R</i> ,8 <i>S</i> ,10 <i>S</i> -5 (conformer 5) |                           |           |           |        |                           |           |           |
|------------------------------------------------------------------------------|---------------------------|-----------|-----------|--------|---------------------------|-----------|-----------|
| Atomic                                                                       | Standard Orientation (Å ) |           |           | Atomic | Standard Orientation (Å ) |           |           |
| Type                                                                         | X                         | Y         | Z         | Type   | X                         | Y         | Z         |
| C                                                                            | -2.252963                 | -2.189028 | 1.577042  | H      | 1.306929                  | -2.228109 | -0.246135 |
| C                                                                            | -2.878686                 | -1.339229 | 0.760699  | H      | 1.99205                   | -2.078771 | 1.370203  |
| C                                                                            | -1.997245                 | -0.855261 | -0.369223 | H      | -0.838715                 | -0.382068 | 2.996276  |
| C                                                                            | -0.755751                 | -0.127839 | 0.223068  | H      | 0.619359                  | -1.366123 | 3.235983  |
| C                                                                            | 0.026168                  | -1.163437 | 1.141149  | H      | 0.756706                  | 0.279448  | 2.610892  |
| C                                                                            | -0.838383                 | -2.460191 | 1.139447  | H      | 0.635308                  | 3.508674  | -0.210176 |
| C                                                                            | 0.129451                  | 0.54775   | -0.865581 | H      | 1.290222                  | 3.654553  | 1.438315  |
| C                                                                            | 1.439333                  | 0.834677  | -0.220755 | H      | 2.32114                   | 4.002814  | 0.0599    |
| C                                                                            | 2.289502                  | -0.382156 | 0.076117  | H      | -2.13457                  | 0.032012  | -2.342514 |
| C                                                                            | 1.42905                   | -1.545142 | 0.596605  | H      | -3.68296                  | -0.582378 | -1.703986 |
| C                                                                            | 1.960638                  | 1.915393  | 0.376147  | H      | 5.239754                  | -0.258158 | -3.399287 |
| C                                                                            | 3.134853                  | 1.456819  | 1.173246  | H      | 4.963616                  | -1.772653 | -2.510935 |
| O                                                                            | 3.255292                  | 0.08989   | 1.039344  | H      | 3.698735                  | -1.127776 | -3.575043 |
| C                                                                            | 0.143878                  | -0.626527 | 2.57979   | H      | 3.44308                   | 0.864714  | -2.059111 |
| O                                                                            | 3.86509                   | 2.107591  | 1.878858  | H      | 4.710636                  | 0.21577   | -0.996723 |
| C                                                                            | 1.519474                  | 3.343194  | 0.41223   | H      | -5.432031                 | 3.20591   | 0.144309  |
| C                                                                            | -2.753404                 | -0.071442 | -1.449773 | H      | -3.687311                 | 3.276592  | 0.537089  |
| O                                                                            | -1.515604                 | -2.010936 | -1.112674 | H      | -4.224957                 | 3.625477  | -1.106874 |
| O                                                                            | -0.895432                 | -2.996906 | -0.206035 |        |                           |           |           |
| O                                                                            | 2.956511                  | -0.898333 | -1.053815 |        |                           |           |           |
| C                                                                            | 4.488809                  | -0.853617 | -2.86849  |        |                           |           |           |
| C                                                                            | 3.91983                   | -0.059712 | -1.704201 |        |                           |           |           |
| O                                                                            | -3.035508                 | 1.269345  | -1.003301 |        |                           |           |           |
| O                                                                            | -5.186072                 | 0.725382  | -0.509563 |        |                           |           |           |
| C                                                                            | -4.300286                 | 1.546396  | -0.580032 |        |                           |           |           |
| C                                                                            | -4.42567                  | 3.007848  | -0.225234 |        |                           |           |           |
| H                                                                            | -2.711884                 | -2.699175 | 2.418265  |        |                           |           |           |
| H                                                                            | -3.922117                 | -1.047883 | 0.823833  |        |                           |           |           |
| H                                                                            | -1.128668                 | 0.675894  | 0.865905  |        |                           |           |           |
| H                                                                            | -0.349162                 | -3.266069 | 1.695281  |        |                           |           |           |
| H                                                                            | 0.273941                  | -0.142238 | -1.705837 |        |                           |           |           |
| H                                                                            | -0.364901                 | 1.450318  | -1.235667 |        |                           |           |           |

| 1 <i>R</i> ,4 <i>S</i> ,5 <i>R</i> ,8 <i>S</i> ,10 <i>S</i> -5 (conformer 6) |                           |           |           |             |                           |           |           |
|------------------------------------------------------------------------------|---------------------------|-----------|-----------|-------------|---------------------------|-----------|-----------|
| Atomic Type                                                                  | Standard Orientation (Å ) |           |           | Atomic Type | Standard Orientation (Å ) |           |           |
|                                                                              | X                         | Y         | Z         |             | X                         | Y         | Z         |
| C                                                                            | 1.820945                  | -2.806476 | -1.252528 | H           | -2.118416                 | -2.16261  | -1.013716 |
| C                                                                            | 2.599499                  | -1.867662 | -0.715499 | H           | -2.153578                 | -0.821405 | -2.148821 |
| C                                                                            | 1.834352                  | -0.907211 | 0.165038  | H           | 1.165386                  | -1.184195 | -3.159469 |
| C                                                                            | 0.725268                  | -0.149165 | -0.636267 | H           | -0.42795                  | -1.900857 | -3.467727 |
| C                                                                            | -0.154111                 | -1.236615 | -1.394913 | H           | -0.267691                 | -0.149106 | -3.278368 |
| C                                                                            | 0.373509                  | -2.613139 | -0.888888 | H           | -0.785873                 | 3.730066  | -0.318684 |
| C                                                                            | -0.021692                 | 0.828546  | 0.321472  | H           | -2.072693                 | 3.90665   | -1.535781 |
| C                                                                            | -1.441967                 | 1.027351  | -0.058464 | H           | -2.44643                  | 4.137183  | 0.164837  |
| C                                                                            | -2.274137                 | -0.230656 | -0.131517 | H           | 2.218252                  | 0.593246  | 1.713645  |
| C                                                                            | -1.713294                 | -1.164343 | -1.208648 | H           | 3.487625                  | -0.621356 | 1.530891  |
| C                                                                            | -2.180279                 | 2.089468  | -0.407331 | H           | -3.238746                 | -0.798461 | 4.270193  |
| C                                                                            | -3.555157                 | 1.598181  | -0.708541 | H           | -3.499141                 | -2.129751 | 3.12123   |
| O                                                                            | -3.588177                 | 0.23407   | -0.530694 | H           | -1.847574                 | -1.636613 | 3.540523  |
| C                                                                            | 0.102381                  | -1.114795 | -2.914738 | H           | -2.242044                 | 0.596817  | 2.447469  |
| O                                                                            | -4.516464                 | 2.232868  | -1.067773 | H           | -3.884164                 | 0.08546   | 2.002899  |
| C                                                                            | -1.842469                 | 3.540122  | -0.528663 | H           | 5.688775                  | 3.248735  | -0.020856 |
| C                                                                            | 2.762343                  | -0.010752 | 0.985562  | H           | 5.541773                  | 1.892537  | -1.176686 |
| O                                                                            | 1.163482                  | -1.69845  | 1.182413  | H           | 4.244425                  | 3.082925  | -1.063952 |
| O                                                                            | 0.243675                  | -2.666335 | 0.552507  |             |                           |           |           |
| O                                                                            | -2.355664                 | -0.955334 | 1.056936  |             |                           |           |           |
| C                                                                            | -2.862553                 | -1.270997 | 3.356139  |             |                           |           |           |
| C                                                                            | -2.86927                  | -0.274412 | 2.209872  |             |                           |           |           |
| O                                                                            | 3.443977                  | 0.842398  | 0.04793   |             |                           |           |           |
| O                                                                            | 4.547243                  | 1.78865   | 1.779995  |             |                           |           |           |
| C                                                                            | 4.336513                  | 1.714522  | 0.592079  |             |                           |           |           |
| C                                                                            | 4.998473                  | 2.542427  | -0.482693 |             |                           |           |           |
| H                                                                            | 2.165651                  | -3.63902  | -1.857946 |             |                           |           |           |
| H                                                                            | 3.679347                  | -1.807331 | -0.811034 |             |                           |           |           |
| H                                                                            | 1.2269                    | 0.457099  | -1.396104 |             |                           |           |           |
| H                                                                            | -0.271968                 | -3.433221 | -1.216401 |             |                           |           |           |
| H                                                                            | -0.01586                  | 0.385103  | 1.325331  |             |                           |           |           |
| H                                                                            | 0.519295                  | 1.7788    | 0.369176  |             |                           |           |           |

| 1 <i>R</i> ,4 <i>S</i> ,5 <i>R</i> ,8 <i>S</i> ,10 <i>S</i> -5 (conformer 7) |                           |           |           |        |                           |           |           |
|------------------------------------------------------------------------------|---------------------------|-----------|-----------|--------|---------------------------|-----------|-----------|
| Atomic                                                                       | Standard Orientation (Å ) |           |           | Atomic | Standard Orientation (Å ) |           |           |
| Type                                                                         | X                         | Y         | Z         | Type   | X                         | Y         | Z         |
| C                                                                            | 2.042624                  | -2.661251 | -1.258445 | H      | -1.885008                 | -1.949299 | -1.593119 |
| C                                                                            | 2.766755                  | -1.793745 | -0.551542 | H      | -1.731852                 | -0.387314 | -2.382081 |
| C                                                                            | 1.920116                  | -0.928884 | 0.355537  | H      | 1.675755                  | -0.809383 | -2.987074 |
| C                                                                            | 0.872722                  | -0.073014 | -0.435099 | H      | 0.140291                  | -1.451254 | -3.598696 |
| C                                                                            | 0.116794                  | -1.044735 | -1.442511 | H      | 0.277391                  | 0.261331  | -3.177511 |
| C                                                                            | 0.566407                  | -2.480447 | -1.031605 | H      | -0.738403                 | 3.669221  | 0.372887  |
| C                                                                            | -0.007414                 | 0.718103  | 0.582666  | H      | -1.915233                 | 4.080194  | -0.898961 |
| C                                                                            | -1.380185                 | 0.970583  | 0.080113  | H      | -2.441719                 | 3.980141  | 0.773635  |
| C                                                                            | -2.16838                  | -0.249544 | -0.331417 | H      | 2.187412                  | 0.527804  | 1.979091  |
| C                                                                            | -1.450188                 | -0.949387 | -1.487349 | H      | 3.288592                  | -0.874626 | 2.01116   |
| C                                                                            | -2.093594                 | 2.080388  | -0.155756 | H      | -3.651222                 | -1.650543 | 3.724642  |
| C                                                                            | -3.408802                 | 1.656901  | -0.713635 | H      | -3.767878                 | -2.725351 | 2.31347   |
| O                                                                            | -3.432325                 | 0.283039  | -0.801787 | H      | -2.17958                  | -2.356431 | 3.012317  |
| C                                                                            | 0.589755                  | -0.747944 | -2.885563 | H      | -2.451337                 | 0.055821  | 2.343539  |
| O                                                                            | -4.333165                 | 2.347451  | -1.067576 | H      | -4.024454                 | -0.328458 | 1.613006  |
| C                                                                            | -1.768972                 | 3.52661   | 0.035741  | H      | 4.766527                  | 3.57918   | -0.239405 |
| C                                                                            | 2.777143                  | -0.153952 | 1.368595  | H      | 5.803605                  | 2.30232   | 0.461233  |
| O                                                                            | 1.168397                  | -1.841245 | 1.202622  | H      | 5.03                      | 2.031265  | -1.100671 |
| O                                                                            | 0.281913                  | -2.683442 | 0.375896  |        |                           |           |           |
| O                                                                            | -2.385583                 | -1.191278 | 0.672678  |        |                           |           |           |
| C                                                                            | -3.166959                 | -1.942006 | 2.786051  |        |                           |           |           |
| C                                                                            | -3.039943                 | -0.740288 | 1.865666  |        |                           |           |           |
| O                                                                            | 3.814072                  | 0.57259   | 0.681507  |        |                           |           |           |
| O                                                                            | 2.758127                  | 2.558786  | 1.008751  |        |                           |           |           |
| C                                                                            | 3.695879                  | 1.923255  | 0.581109  |        |                           |           |           |
| C                                                                            | 4.898767                  | 2.503404  | -0.121911 |        |                           |           |           |
| H                                                                            | 2.444632                  | -3.430453 | -1.910615 |        |                           |           |           |
| H                                                                            | 3.850445                  | -1.740387 | -0.530892 |        |                           |           |           |
| H                                                                            | 1.42051                   | 0.661449  | -1.035309 |        |                           |           |           |
| H                                                                            | -0.048129                 | -3.247839 | -1.51087  |        |                           |           |           |
| H                                                                            | -0.098637                 | 0.104862  | 1.488384  |        |                           |           |           |
| H                                                                            | 0.501658                  | 1.646234  | 0.851248  |        |                           |           |           |

**Table S3** Energy analyses of 1*S*,4*R*,5*S*,8*S*,10*R*-5 (eight conformers)

| NO.                                                                             | 3D conformers<br>B3LYP/6-31G(d,p)                                                   | E (Hartree)  | $\Delta E$<br>(KJ/mol) | Boltzmann<br>distribution |
|---------------------------------------------------------------------------------|-------------------------------------------------------------------------------------|--------------|------------------------|---------------------------|
| 1 <i>S</i> ,4 <i>R</i> ,5 <i>S</i> ,8 <i>S</i> ,10 <i>R</i> -5<br>(conformer 1) |    | -1264.567929 | 5.84173493             | 5.90%                     |
| 1 <i>S</i> ,4 <i>R</i> ,5 <i>S</i> ,8 <i>S</i> ,10 <i>R</i> -5<br>(conformer 2) |   | -1264.567006 | 8.265070363            | 2.22%                     |
| 1 <i>S</i> ,4 <i>R</i> ,5 <i>S</i> ,8 <i>S</i> ,10 <i>R</i> -5<br>(conformer 3) |  | -1264.570154 | 0                      | 62.27%                    |
| 1 <i>S</i> ,4 <i>R</i> ,5 <i>S</i> ,8 <i>S</i> ,10 <i>R</i> -5<br>(conformer 4) |  | -1264.569214 | 2.467968914            | 23.01%                    |

---

1*S*,4*R*,5*S*,8*S*,10*R*-**5**  
(conformer 5)

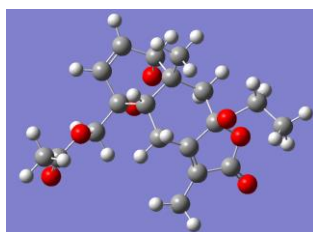

-1264.566969    8.362213821    2.13%

---

1*S*,4*R*,5*S*,8*S*,10*R*-**5**  
(conformer 6)

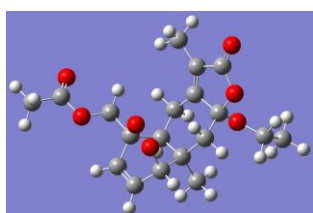

-1264.567201    7.753098088    2.73%

---

1*S*,4*R*,5*S*,8*S*,10*R*-**5**  
(conformer 7)

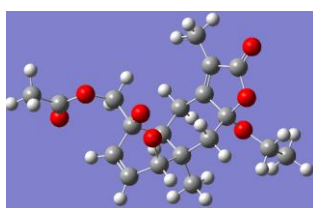

-1264.566017    10.86168872    0.78%

---

1*S*,4*R*,5*S*,8*S*,10*R*-**5**  
(conformer 8)

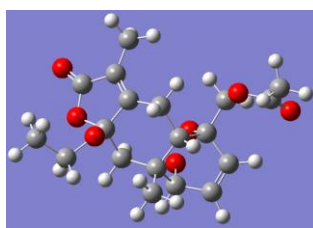

-1264.566217    10.33658895    0.96%

---

**Table S4** Cartesian coordinates of the low-energy re-optimized conformers of **1*S*,4*R*,5*S*,8*S*,10*R*-5** calculated at B3LYP/6-31G(d,p) level of theory.

| 1 <i>S</i> ,4 <i>R</i> ,5 <i>S</i> ,8 <i>S</i> ,10 <i>R</i> -5 (conformer 1) |                           |           |           |        |                           |           |           |
|------------------------------------------------------------------------------|---------------------------|-----------|-----------|--------|---------------------------|-----------|-----------|
| Atomic                                                                       | Standard Orientation (Å ) |           |           | Atomic | Standard Orientation (Å ) |           |           |
| Type                                                                         | X                         | Y         | Z         | Type   | X                         | Y         | Z         |
| C                                                                            | 1.567642                  | -3.102684 | -0.918507 | H      | -2.537107                 | -1.833471 | -0.740383 |
| C                                                                            | 2.428696                  | -2.123244 | -0.639176 | H      | -1.522495                 | -0.793163 | -1.726752 |
| C                                                                            | 1.791175                  | -0.750418 | -0.660481 | H      | -1.268345                 | -2.189642 | 1.873327  |
| C                                                                            | 0.66088                   | -0.762835 | 0.418622  | H      | -1.581119                 | -3.469604 | 0.689665  |
| C                                                                            | -0.452933                 | -1.767767 | -0.099698 | H      | 0.037294                  | -3.290672 | 1.393675  |
| C                                                                            | 0.205922                  | -2.56377  | -1.27386  | H      | 0.446375                  | 3.45792   | -0.240316 |
| C                                                                            | 0.141716                  | 0.625109  | 0.901536  | H      | -0.401333                 | 3.703877  | -1.784277 |
| C                                                                            | -1.035                    | 1.12373   | 0.145043  | H      | -1.072729                 | 4.376503  | -0.305061 |
| C                                                                            | -2.194006                 | 0.165047  | 0.032397  | H      | 3.592767                  | 0.240147  | -1.326629 |
| C                                                                            | -1.72771                  | -1.094844 | -0.698136 | H      | 2.354145                  | 1.355336  | -0.742605 |
| C                                                                            | -1.3257                   | 2.258902  | -0.502152 | H      | -5.354778                 | -1.183299 | 3.007925  |
| C                                                                            | -2.692529                 | 2.115302  | -1.073269 | H      | -3.664946                 | -1.112314 | 3.551582  |
| O                                                                            | -3.169111                 | 0.854625  | -0.766577 | H      | -4.53624                  | 0.386387  | 3.171539  |
| C                                                                            | -0.836897                 | -2.738872 | 1.030934  | H      | -4.675986                 | -0.29376  | 0.75878   |
| O                                                                            | -3.330832                 | 2.906957  | -1.719501 | H      | -3.818382                 | -1.80408  | 1.136501  |
| C                                                                            | -0.538271                 | 3.511007  | -0.713927 | H      | 5.66958                   | 1.825857  | 2.58383   |
| C                                                                            | 2.814155                  | 0.379054  | -0.571907 | H      | 4.08661                   | 1.201786  | 3.134585  |
| O                                                                            | 1.189397                  | -0.512124 | -1.965714 | H      | 5.305265                  | 0.075053  | 2.53571   |
| O                                                                            | 0.400609                  | -1.676903 | -2.402101 |        |                           |           |           |
| O                                                                            | -2.696075                 | -0.052388 | 1.331323  |        |                           |           |           |
| C                                                                            | -4.40124                  | -0.659493 | 2.878889  |        |                           |           |           |
| C                                                                            | -3.945103                 | -0.753128 | 1.432573  |        |                           |           |           |
| O                                                                            | 3.389855                  | 0.321784  | 0.7458    |        |                           |           |           |
| O                                                                            | 4.711702                  | 2.072199  | 0.196219  |        |                           |           |           |
| C                                                                            | 4.35684                   | 1.245613  | 1.003413  |        |                           |           |           |
| C                                                                            | 4.893738                  | 1.081143  | 2.404533  |        |                           |           |           |
| H                                                                            | 1.815608                  | -4.157564 | -0.982944 |        |                           |           |           |
| H                                                                            | 3.484959                  | -2.250756 | -0.42209  |        |                           |           |           |
| H                                                                            | 1.120591                  | -1.217483 | 1.300757  |        |                           |           |           |
| H                                                                            | -0.479613                 | -3.317987 | -1.672541 |        |                           |           |           |
| H                                                                            | -0.185897                 | 0.494287  | 1.941791  |        |                           |           |           |
| H                                                                            | 0.95318                   | 1.35634   | 0.927379  |        |                           |           |           |

| 1 <i>S</i> ,4 <i>R</i> ,5 <i>S</i> ,8 <i>S</i> ,10 <i>R</i> - <b>5</b> (conformer 2) |                           |           |           |                |                           |           |           |
|--------------------------------------------------------------------------------------|---------------------------|-----------|-----------|----------------|---------------------------|-----------|-----------|
| Atomic<br>Type                                                                       | Standard Orientation (Å ) |           |           | Atomic<br>Type | Standard Orientation (Å ) |           |           |
|                                                                                      | X                         | Y         | Z         |                | X                         | Y         | Z         |
| C                                                                                    | 1.98683                   | -2.515903 | -1.264098 | H              | -2.264523                 | -1.961677 | -0.962804 |
| C                                                                                    | 2.686202                  | -1.452686 | -0.863447 | H              | -1.444631                 | -0.659118 | -1.808806 |
| C                                                                                    | 1.834204                  | -0.208607 | -0.718358 | H              | -0.921243                 | -2.4151   | 1.600949  |
| C                                                                                    | 0.730699                  | -0.529571 | 0.340597  | H              | -1.040326                 | -3.577315 | 0.269664  |
| C                                                                                    | -0.211718                 | -1.63368  | -0.302468 | H              | 0.537882                  | -3.225352 | 0.998554  |
| C                                                                                    | 0.551853                  | -2.166087 | -1.558436 | H              | -0.183151                 | 3.647625  | 0.195572  |
| C                                                                                    | -0.002609                 | 0.689289  | 0.980375  | H              | -1.068905                 | 3.93244   | -1.321314 |
| C                                                                                    | -1.254458                 | 1.07397   | 0.280337  | H              | -1.832054                 | 4.307781  | 0.217479  |
| C                                                                                    | -2.243211                 | -0.040677 | 0.046381  | H              | 3.496417                  | 1.094388  | -1.183511 |
| C                                                                                    | -1.586243                 | -1.111048 | -0.82549  | H              | 2.028216                  | 1.948308  | -0.642412 |
| C                                                                                    | -1.735549                 | 2.21498   | -0.228379 | H              | -5.102368                 | -2.232079 | 2.818627  |
| C                                                                                    | -3.067431                 | 1.91919   | -0.822094 | H              | -3.439812                 | -1.949801 | 3.377641  |
| O                                                                                    | -3.327915                 | 0.570476  | -0.671945 | H              | -4.549693                 | -0.580035 | 3.173733  |
| C                                                                                    | -0.418792                 | -2.782262 | 0.700821  | H              | -4.608147                 | -0.982409 | 0.696079  |
| O                                                                                    | -3.834197                 | 2.667668  | -1.373538 | H              | -3.509773                 | -2.365392 | 0.896501  |
| C                                                                                    | -1.165723                 | 3.595243  | -0.28267  | H              | 5.803149                  | 0.74392   | 2.739684  |
| C                                                                                    | 2.653939                  | 1.066625  | -0.491485 | H              | 4.642436                  | 2.101642  | 2.817789  |
| O                                                                                    | 1.184244                  | 0.085059  | -1.990684 | H              | 4.092371                  | 0.46756   | 3.190803  |
| O                                                                                    | 0.586699                  | -1.1296   | -2.570697 |                |                           |           |           |
| O                                                                                    | -2.687186                 | -0.488995 | 1.306565  |                |                           |           |           |
| C                                                                                    | -4.249248                 | -1.547318 | 2.759173  |                |                           |           |           |
| C                                                                                    | -3.803061                 | -1.392295 | 1.315021  |                |                           |           |           |
| O                                                                                    | 3.131106                  | 1.139014  | 0.866189  |                |                           |           |           |
| O                                                                                    | 5.206747                  | 0.448892  | 0.249473  |                |                           |           |           |
| C                                                                                    | 4.437143                  | 0.832072  | 1.100755  |                |                           |           |           |
| C                                                                                    | 4.771709                  | 1.046009  | 2.556682  |                |                           |           |           |
| H                                                                                    | 2.402724                  | -3.498041 | -1.466631 |                |                           |           |           |
| H                                                                                    | 3.756166                  | -1.424518 | -0.684315 |                |                           |           |           |
| H                                                                                    | 1.264596                  | -1.006013 | 1.168216  |                |                           |           |           |
| H                                                                                    | -0.008979                 | -2.966946 | -2.050314 |                |                           |           |           |
| H                                                                                    | -0.293251                 | 0.383152  | 1.994578  |                |                           |           |           |
| H                                                                                    | 0.679695                  | 1.533404  | 1.102035  |                |                           |           |           |

| 1 <i>S</i> ,4 <i>R</i> ,5 <i>S</i> ,8 <i>S</i> ,10 <i>R</i> - <b>5</b> (conformer 4) |                           |           |           |                |                           |           |           |
|--------------------------------------------------------------------------------------|---------------------------|-----------|-----------|----------------|---------------------------|-----------|-----------|
| Atomic<br>Type                                                                       | Standard Orientation (Å ) |           |           | Atomic<br>Type | Standard Orientation (Å ) |           |           |
|                                                                                      | X                         | Y         | Z         |                | X                         | Y         | Z         |
| C                                                                                    | -2.194849                 | 2.68452   | -0.592489 | H              | 2.114612                  | 2.438812  | -0.379856 |
| C                                                                                    | -2.791239                 | 1.496813  | -0.476131 | H              | 1.381202                  | 1.37613   | -1.58611  |
| C                                                                                    | -1.832748                 | 0.337314  | -0.653321 | H              | 0.796802                  | 2.141593  | 2.146675  |
| C                                                                                    | -0.737132                 | 0.474163  | 0.452283  | H              | 0.73398                   | 3.600929  | 1.156033  |
| C                                                                                    | 0.090205                  | 1.787383  | 0.118495  | H              | -0.770297                 | 2.905177  | 1.792018  |
| C                                                                                    | -0.741694                 | 2.549446  | -0.96373  | H              | 0.493025                  | -3.411153 | -0.824291 |
| C                                                                                    | 0.114648                  | -0.798737 | 0.75051   | H              | 1.280507                  | -3.141085 | -2.39654  |
| C                                                                                    | 1.372848                  | -0.878749 | -0.036976 | H              | 2.180527                  | -3.900643 | -1.091913 |
| C                                                                                    | 2.260469                  | 0.342785  | 0.029164  | H              | -3.390312                 | -0.943843 | -1.434277 |
| C                                                                                    | 1.495723                  | 1.544022  | -0.513912 | H              | -1.842859                 | -1.775867 | -1.13516  |
| C                                                                                    | 1.909608                  | -1.787759 | -0.86128  | H              | 4.55736                   | -0.451438 | 3.873674  |
| C                                                                                    | 3.191148                  | -1.225718 | -1.373179 | H              | 4.50977                   | 1.182992  | 3.178006  |
| O                                                                                    | 3.37256                   | 0.030425  | -0.832579 | H              | 3.059863                  | 0.502348  | 3.942841  |
| C                                                                                    | 0.215025                  | 2.660658  | 1.379978  | H              | 2.932633                  | -1.245512 | 2.133413  |
| O                                                                                    | 3.978725                  | -1.722612 | -2.139163 | H              | 4.388657                  | -0.565655 | 1.377779  |
| C                                                                                    | 1.431937                  | -3.130389 | -1.31069  | H              | -5.624867                 | -1.828186 | 2.444315  |
| C                                                                                    | -2.536209                 | -1.020456 | -0.760483 | H              | -4.329396                 | -3.03382  | 2.186851  |
| O                                                                                    | -1.187925                 | 0.435098  | -1.957673 | H              | -3.942344                 | -1.49418  | 2.956461  |
| O                                                                                    | -0.708098                 | 1.804891  | -2.206922 |                |                           |           |           |
| O                                                                                    | 2.718237                  | 0.664404  | 1.31825   |                |                           |           |           |
| C                                                                                    | 3.933749                  | 0.264368  | 3.327037  |                |                           |           |           |
| C                                                                                    | 3.513381                  | -0.322731 | 1.990492  |                |                           |           |           |
| O                                                                                    | -2.971975                 | -1.480038 | 0.534008  |                |                           |           |           |
| O                                                                                    | -5.115063                 | -0.849808 | 0.115347  |                |                           |           |           |
| C                                                                                    | -4.294011                 | -1.363146 | 0.840507  |                |                           |           |           |
| C                                                                                    | -4.572369                 | -1.966122 | 2.195695  |                |                           |           |           |
| H                                                                                    | -2.697811                 | 3.645022  | -0.537652 |                |                           |           |           |
| H                                                                                    | -3.850603                 | 1.32915   | -0.310716 |                |                           |           |           |
| H                                                                                    | -1.290097                 | 0.668133  | 1.376153  |                |                           |           |           |
| H                                                                                    | -0.261711                 | 3.494893  | -1.234501 |                |                           |           |           |
| H                                                                                    | 0.400237                  | -0.736451 | 1.810051  |                |                           |           |           |
| H                                                                                    | -0.491524                 | -1.702223 | 0.654798  |                |                           |           |           |

| 1 <i>S</i> ,4 <i>R</i> ,5 <i>S</i> ,8 <i>S</i> ,10 <i>R</i> - <b>5</b> (conformer 5) |                           |           |           |                |                           |           |           |
|--------------------------------------------------------------------------------------|---------------------------|-----------|-----------|----------------|---------------------------|-----------|-----------|
| Atomic<br>Type                                                                       | Standard Orientation (Å ) |           |           | Atomic<br>Type | Standard Orientation (Å ) |           |           |
|                                                                                      | X                         | Y         | Z         |                | X                         | Y         | Z         |
| C                                                                                    | -1.725006                 | 3.133729  | -0.660228 | H              | 2.42928                   | 2.038375  | -0.483278 |
| C                                                                                    | -2.545173                 | 2.097504  | -0.480554 | H              | 1.485494                  | 1.03908   | -1.580388 |
| C                                                                                    | -1.844477                 | 0.760638  | -0.596435 | H              | 1.09644                   | 2.124218  | 2.114151  |
| C                                                                                    | -0.737688                 | 0.736139  | 0.506522  | H              | 1.375721                  | 3.506221  | 1.043821  |
| C                                                                                    | 0.338613                  | 1.828031  | 0.095749  | H              | -0.247616                 | 3.204043  | 1.693483  |
| C                                                                                    | -0.333153                 | 2.686616  | -1.025737 | H              | -0.307972                 | -3.404607 | -0.479352 |
| C                                                                                    | -0.164526                 | -0.661929 | 0.889518  | H              | 0.587316                  | -3.490987 | -2.013488 |
| C                                                                                    | 1.05143                   | -1.043811 | 0.127161  | H              | 1.254084                  | -4.245419 | -0.572032 |
| C                                                                                    | 2.164059                  | -0.025939 | 0.118618  | H              | -3.584108                 | -0.252149 | -1.382889 |
| C                                                                                    | 1.654224                  | 1.263121  | -0.525549 | H              | -2.307492                 | -1.35459  | -0.859713 |
| C                                                                                    | 1.410836                  | -2.109487 | -0.599212 | H              | 5.882849                  | 0.349331  | 2.298499  |
| C                                                                                    | 2.782553                  | -1.860195 | -1.119252 | H              | 4.626853                  | -0.704202 | 2.98383   |
| O                                                                                    | 3.191272                  | -0.606128 | -0.703425 | H              | 5.142317                  | -0.920088 | 1.296345  |
| C                                                                                    | 0.657033                  | 2.720351  | 1.308783  | H              | 4.185121                  | 1.304056  | 0.700043  |
| O                                                                                    | 3.475166                  | -2.570239 | -1.803372 | H              | 3.710931                  | 1.57558   | 2.386335  |
| C                                                                                    | 0.689216                  | -3.37593  | -0.928155 | H              | -5.666821                 | -2.238426 | 2.336247  |
| C                                                                                    | -2.815643                 | -0.416701 | -0.622948 | H              | -4.127076                 | -1.589429 | 2.973982  |
| O                                                                                    | -1.206051                 | 0.655618  | -1.90188  | H              | -5.384374                 | -0.474751 | 2.435449  |
| O                                                                                    | -0.464792                 | 1.886388  | -2.225768 |                |                           |           |           |
| O                                                                                    | 2.62072                   | 0.127498  | 1.441633  |                |                           |           |           |
| C                                                                                    | 4.948081                  | -0.180032 | 2.077617  |                |                           |           |           |
| C                                                                                    | 3.879283                  | 0.804343  | 1.624945  |                |                           |           |           |
| O                                                                                    | -3.420495                 | -0.491742 | 0.68072   |                |                           |           |           |
| O                                                                                    | -4.648887                 | -2.248444 | -0.03919  |                |                           |           |           |
| C                                                                                    | -4.349457                 | -1.474881 | 0.839847  |                |                           |           |           |
| C                                                                                    | -4.923186                 | -1.447484 | 2.235728  |                |                           |           |           |
| H                                                                                    | -2.020244                 | 4.178256  | -0.645774 |                |                           |           |           |
| H                                                                                    | -3.6103                   | 2.159905  | -0.278858 |                |                           |           |           |
| H                                                                                    | -1.234955                 | 1.097251  | 1.411225  |                |                           |           |           |
| H                                                                                    | 0.324464                  | 3.500454  | -1.3466   |                |                           |           |           |
| H                                                                                    | 0.133474                  | -0.601421 | 1.945084  |                |                           |           |           |
| H                                                                                    | -0.940962                 | -1.428817 | 0.835627  |                |                           |           |           |

| 1 <i>S</i> ,4 <i>R</i> ,5 <i>S</i> ,8 <i>S</i> ,10 <i>R</i> - <b>5</b> (conformer 6) |                           |           |           |        |                           |           |           |
|--------------------------------------------------------------------------------------|---------------------------|-----------|-----------|--------|---------------------------|-----------|-----------|
| Atomic                                                                               | Standard Orientation (Å ) |           |           | Atomic | Standard Orientation (Å ) |           |           |
| Type                                                                                 | X                         | Y         | Z         | Type   | X                         | Y         | Z         |
| C                                                                                    | -1.522574                 | -3.026358 | 0.644759  | H      | 2.457982                  | -1.561025 | 1.339854  |
| C                                                                                    | -2.292544                 | -2.163065 | -0.019584 | H      | 1.200799                  | -0.428478 | 1.810671  |
| C                                                                                    | -1.699975                 | -0.771124 | -0.080374 | H      | 1.953916                  | -2.435178 | -1.41315  |
| C                                                                                    | -0.316403                 | -0.902317 | -0.800527 | H      | 1.951931                  | -3.470256 | 0.023728  |
| C                                                                                    | 0.628753                  | -1.73333  | 0.165384  | H      | 0.58221                   | -3.516934 | -1.102001 |
| C                                                                                    | -0.314746                 | -2.355537 | 1.24548   | H      | -0.336165                 | 3.373812  | -0.895046 |
| C                                                                                    | 0.302931                  | 0.408629  | -1.378374 | H      | 0.066705                  | 3.939754  | 0.742311  |
| C                                                                                    | 1.223418                  | 1.101517  | -0.44077  | H      | 1.101591                  | 4.376958  | -0.61006  |
| C                                                                                    | 2.318187                  | 0.248654  | 0.149854  | H      | -2.278716                 | 1.278474  | -0.479958 |
| C                                                                                    | 1.683582                  | -0.890824 | 0.947984  | H      | -2.659589                 | 0.144114  | -1.78773  |
| C                                                                                    | 1.31385                   | 2.347559  | 0.039695  | H      | 6.180477                  | -1.411047 | -1.58024  |
| C                                                                                    | 2.474705                  | 2.387949  | 0.97071   | H      | 4.698127                  | -1.54502  | -2.550201 |
| O                                                                                    | 3.030558                  | 1.124335  | 1.038699  | H      | 5.418446                  | 0.048893  | -2.249907 |
| C                                                                                    | 1.317891                  | -2.857099 | -0.629034 | H      | 4.913057                  | -0.172609 | 0.199886  |
| O                                                                                    | 2.903242                  | 3.316801  | 1.607195  | H      | 4.204026                  | -1.775799 | -0.093261 |
| C                                                                                    | 0.485782                  | 3.567984  | -0.199859 | H      | -6.941707                 | 1.426332  | -0.302978 |
| C                                                                                    | -2.6254                   | 0.265748  | -0.699157 | H      | -6.521692                 | -0.300119 | -0.080526 |
| O                                                                                    | -1.474224                 | -0.27906  | 1.273051  | H      | -6.103984                 | 0.86695   | 1.174515  |
| O                                                                                    | -0.81733                  | -1.303398 | 2.103314  |        |                           |           |           |
| O                                                                                    | 3.157295                  | -0.160299 | -0.906029 |        |                           |           |           |
| C                                                                                    | 5.221519                  | -0.932765 | -1.807991 |        |                           |           |           |
| C                                                                                    | 4.39488                   | -0.790338 | -0.541145 |        |                           |           |           |
| O                                                                                    | -3.941918                 | 0.087347  | -0.155641 |        |                           |           |           |
| O                                                                                    | -4.628562                 | 1.864546  | -1.371535 |        |                           |           |           |
| C                                                                                    | -4.86997                  | 0.985995  | -0.574511 |        |                           |           |           |
| C                                                                                    | -6.199792                 | 0.73178   | 0.091993  |        |                           |           |           |
| H                                                                                    | -1.76737                  | -4.067323 | 0.831707  |        |                           |           |           |
| H                                                                                    | -3.260002                 | -2.385371 | -0.456713 |        |                           |           |           |
| H                                                                                    | -0.514359                 | -1.532819 | -1.674059 |        |                           |           |           |
| H                                                                                    | 0.245718                  | -2.990266 | 1.938815  |        |                           |           |           |
| H                                                                                    | 0.903911                  | 0.115373  | -2.249674 |        |                           |           |           |
| H                                                                                    | -0.472369                 | 1.081073  | -1.755601 |        |                           |           |           |

| 1 <i>S</i> ,4 <i>R</i> ,5 <i>S</i> ,8 <i>S</i> ,10 <i>R</i> - <b>5</b> (conformer 7) |                           |           |           |                |                           |           |           |
|--------------------------------------------------------------------------------------|---------------------------|-----------|-----------|----------------|---------------------------|-----------|-----------|
| Atomic<br>Type                                                                       | Standard Orientation (Å ) |           |           | Atomic<br>Type | Standard Orientation (Å ) |           |           |
|                                                                                      | X                         | Y         | Z         |                | X                         | Y         | Z         |
| C                                                                                    | -1.910473                 | -2.517829 | 0.91124   | H              | 2.254033                  | -1.615454 | 1.466032  |
| C                                                                                    | -2.552472                 | -1.602045 | 0.183944  | H              | 1.188814                  | -0.269849 | 1.838322  |
| C                                                                                    | -1.757313                 | -0.324281 | 0.012012  | H              | 1.576046                  | -2.632954 | -1.205028 |
| C                                                                                    | -0.428045                 | -0.730694 | -0.7105   | H              | 1.447867                  | -3.53249  | 0.314896  |
| C                                                                                    | 0.400353                  | -1.611557 | 0.317081  | H              | 0.064977                  | -3.466882 | -0.793719 |
| C                                                                                    | -0.605515                 | -1.995134 | 1.452662  | H              | 0.216137                  | 3.47083   | -1.218027 |
| C                                                                                    | 0.376708                  | 0.408044  | -1.411114 | H              | 0.688676                  | 4.10173   | 0.376902  |
| C                                                                                    | 1.405131                  | 1.036385  | -0.542976 | H              | 1.784427                  | 4.272061  | -0.987625 |
| C                                                                                    | 2.368127                  | 0.08341   | 0.120523  | H              | -1.977991                 | 1.740731  | -0.576131 |
| C                                                                                    | 1.582503                  | -0.873011 | 1.018464  | H              | -2.682695                 | 0.560032  | -1.726963 |
| C                                                                                    | 1.690838                  | 2.291938  | -0.177769 | H              | 5.912054                  | -2.282689 | -1.462169 |
| C                                                                                    | 2.858145                  | 2.238951  | 0.744314  | H              | 4.416529                  | -2.265513 | -2.420893 |
| O                                                                                    | 3.21721                   | 0.917436  | 0.926478  | H              | 5.374461                  | -0.781481 | -2.248287 |
| C                                                                                    | 0.899572                  | -2.887734 | -0.383528 | H              | 4.866283                  | -0.726612 | 0.209995  |
| O                                                                                    | 3.431566                  | 3.14617   | 1.292022  | H              | 3.919419                  | -2.221935 | 0.045859  |
| C                                                                                    | 1.05374                   | 3.597944  | -0.525726 | H              | -7.030021                 | 0.601109  | -0.420868 |
| C                                                                                    | -2.526828                 | 0.802225  | -0.672566 | H              | -6.09578                  | 0.586485  | 1.107609  |
| O                                                                                    | -1.426819                 | 0.230191  | 1.317772  | H              | -6.206879                 | 2.075891  | 0.171034  |
| O                                                                                    | -0.923878                 | -0.815208 | 2.226165  |                |                           |           |           |
| O                                                                                    | 3.120952                  | -0.536742 | -0.896443 |                |                           |           |           |
| C                                                                                    | 5.034867                  | -1.683218 | -1.729367 |                |                           |           |           |
| C                                                                                    | 4.252777                  | -1.315995 | -0.479573 |                |                           |           |           |
| O                                                                                    | -3.796538                 | 1.038737  | -0.04172  |                |                           |           |           |
| O                                                                                    | -4.891354                 | -0.031828 | -1.717821 |                |                           |           |           |
| C                                                                                    | -4.909468                 | 0.593526  | -0.679627 |                |                           |           |           |
| C                                                                                    | -6.146667                 | 0.985711  | 0.089575  |                |                           |           |           |
| H                                                                                    | -2.29869                  | -3.499644 | 1.163883  |                |                           |           |           |
| H                                                                                    | -3.527575                 | -1.728765 | -0.273614 |                |                           |           |           |
| H                                                                                    | -0.742661                 | -1.395446 | -1.521869 |                |                           |           |           |
| H                                                                                    | -0.134379                 | -2.653153 | 2.189471  |                |                           |           |           |
| H                                                                                    | 0.913997                  | -0.056971 | -2.248607 |                |                           |           |           |
| H                                                                                    | -0.292023                 | 1.151106  | -1.854223 |                |                           |           |           |

| 1 <i>S</i> ,4 <i>R</i> ,5 <i>S</i> ,8 <i>S</i> ,10 <i>R</i> - <b>5</b> (conformer 8) |                           |           |           |        |                           |           |           |
|--------------------------------------------------------------------------------------|---------------------------|-----------|-----------|--------|---------------------------|-----------|-----------|
| Atomic                                                                               | Standard Orientation (Å ) |           |           | Atomic | Standard Orientation (Å ) |           |           |
| Type                                                                                 | X                         | Y         | Z         | Type   | X                         | Y         | Z         |
| C                                                                                    | 2.087593                  | -2.65243  | -0.882147 | H      | -2.175008                 | -2.178979 | -0.591628 |
| C                                                                                    | 2.758994                  | -1.52318  | -0.649591 | H      | -1.405581                 | -0.991482 | -1.635747 |
| C                                                                                    | 1.871226                  | -0.295928 | -0.670141 | H      | -0.792268                 | -2.221954 | 1.983079  |
| C                                                                                    | 0.791112                  | -0.493535 | 0.441852  | H      | -0.895265                 | -3.564575 | 0.833897  |
| C                                                                                    | -0.125517                 | -1.703313 | -0.022764 | H      | 0.682088                  | -3.073175 | 1.480515  |
| C                                                                                    | 0.639355                  | -2.389412 | -1.200982 | H      | -0.255152                 | 3.595417  | -0.269125 |
| C                                                                                    | 0.029627                  | 0.782407  | 0.915758  | H      | -1.167002                 | 3.638628  | -1.796572 |
| C                                                                                    | -1.242938                 | 1.028428  | 0.191112  | H      | -1.923645                 | 4.20318   | -0.313312 |
| C                                                                                    | -2.198064                 | -0.137021 | 0.131261  | H      | 3.487484                  | 0.973536  | -1.343649 |
| C                                                                                    | -1.520516                 | -1.298569 | -0.594665 | H      | 1.999723                  | 1.853867  | -0.908656 |
| C                                                                                    | -1.766471                 | 2.072317  | -0.463686 | H      | -5.782045                 | -1.178787 | 2.323003  |
| C                                                                                    | -3.097027                 | 1.658786  | -0.985185 | H      | -4.678009                 | 0.001789  | 3.060913  |
| O                                                                                    | -3.31311                  | 0.336487  | -0.644382 | H      | -5.252781                 | 0.244395  | 1.39637   |
| C                                                                                    | -0.289686                 | -2.701236 | 1.13755   | H      | -3.996645                 | -1.775491 | 0.64838   |
| O                                                                                    | -3.896743                 | 2.301395  | -1.617557 | H      | -3.454215                 | -2.079137 | 2.30842   |
| C                                                                                    | -1.241096                 | 3.447597  | -0.719593 | H      | 5.847636                  | 1.262849  | 2.552718  |
| C                                                                                    | 2.654021                  | 1.021733  | -0.641903 | H      | 4.640996                  | 2.578867  | 2.45592   |
| O                                                                                    | 1.196904                  | -0.206474 | -1.960607 | H      | 4.152723                  | 0.997165  | 3.065596  |
| O                                                                                    | 0.631773                  | -1.508791 | -2.352066 |        |                           |           |           |
| O                                                                                    | -2.604535                 | -0.431446 | 1.44667   |        |                           |           |           |
| C                                                                                    | -4.938142                 | -0.506467 | 2.126478  |        |                           |           |           |
| C                                                                                    | -3.747611                 | -1.294926 | 1.600041  |        |                           |           |           |
| O                                                                                    | 3.143791                  | 1.303393  | 0.683595  |        |                           |           |           |
| O                                                                                    | 5.233                     | 0.592447  | 0.140834  |        |                           |           |           |
| C                                                                                    | 4.461143                  | 1.071434  | 0.939956  |        |                           |           |           |
| C                                                                                    | 4.80435                   | 1.50172   | 2.345123  |        |                           |           |           |
| H                                                                                    | 2.530752                  | -3.641275 | -0.948195 |        |                           |           |           |
| H                                                                                    | 3.82964                   | -1.439105 | -0.49346  |        |                           |           |           |
| H                                                                                    | 1.349303                  | -0.832873 | 1.319456  |        |                           |           |           |
| H                                                                                    | 0.097383                  | -3.268294 | -1.563837 |        |                           |           |           |
| H                                                                                    | -0.238366                 | 0.61474   | 1.9679    |        |                           |           |           |
| H                                                                                    | 0.687497                  | 1.654158  | 0.905278  |        |                           |           |           |

**Table S5** Experimental and calculated <sup>1</sup>H NMR data for compound **5**.

| No.   | <b>5</b> , exptl. $\delta_{\text{H}}$ <sup>a</sup> | 1 <i>R</i> ,4 <i>S</i> ,5 <i>R</i> ,8 <i>S</i> ,10 <i>S</i> - <b>5</b> ,<br>calcd. $\delta_{\text{H}}$ <sup>b</sup> | 1 <i>S</i> ,4 <i>R</i> ,5 <i>S</i> ,8 <i>S</i> ,10 <i>R</i> - <b>5</b> ,<br>calcd. $\delta_{\text{H}}$ <sup>b</sup> |
|-------|----------------------------------------------------|---------------------------------------------------------------------------------------------------------------------|---------------------------------------------------------------------------------------------------------------------|
| 1     | 4.2                                                | 3.96                                                                                                                | 4.02                                                                                                                |
| 2     | 6.74                                               | 7.01                                                                                                                | 6.99                                                                                                                |
| 3     | 6.39                                               | 7.07                                                                                                                | 6.85                                                                                                                |
| 5     | 2.53                                               | 1.60                                                                                                                | 1.94                                                                                                                |
| 6     | 2.47                                               | 2.73                                                                                                                | 2.62                                                                                                                |
|       | 2.61                                               | 2.86                                                                                                                | 2.82                                                                                                                |
| 9     | 1.4                                                | 2.16                                                                                                                | 2.23                                                                                                                |
|       | 2.26                                               | 3.29                                                                                                                | 2.60                                                                                                                |
| 13    | 1.79                                               | 1.95                                                                                                                | 1.78                                                                                                                |
| 14    | 1.61                                               | 0.67                                                                                                                | 1.19                                                                                                                |
| 15    | 4.37                                               | 3.66                                                                                                                | 3.92                                                                                                                |
|       | 4.43                                               | 4.88                                                                                                                | 4.50                                                                                                                |
| 4-OAc | 2.17                                               | 2.22                                                                                                                | 2.18                                                                                                                |
| 1'    | 3.15                                               | 3.37                                                                                                                | 3.03                                                                                                                |
|       | 3.46                                               | 3.62                                                                                                                | 3.59                                                                                                                |
| 2'    | 1.21                                               | 1.28                                                                                                                | 1.23                                                                                                                |

<sup>a</sup> Recorded in CDCl<sub>3</sub> at 600 MHz.<sup>b</sup> Calculated in CDCl<sub>3</sub>

**Table S6** Experimental and calculated  $^{13}\text{C}$  NMR data for compound **5**.

| No.   | <b>5</b> , exptl. $\delta_{\text{C}}$ <sup>a</sup> | 1 <i>R</i> ,4 <i>S</i> ,5 <i>R</i> ,8 <i>S</i> ,10 <i>S</i> - <b>5</b> ,<br>calcd. $\delta_{\text{C}}$ <sup>b</sup> | 1 <i>S</i> ,4 <i>R</i> ,5 <i>S</i> ,8 <i>S</i> ,10 <i>R</i> - <b>5</b> ,<br>calcd. $\delta_{\text{C}}$ <sup>b</sup> |
|-------|----------------------------------------------------|---------------------------------------------------------------------------------------------------------------------|---------------------------------------------------------------------------------------------------------------------|
| 1     | 79.5                                               | 76.06                                                                                                               | 74.25                                                                                                               |
| 2     | 135.8                                              | 135.54                                                                                                              | 134.13                                                                                                              |
| 3     | 129.2                                              | 137.27                                                                                                              | 135.89                                                                                                              |
| 4     | 79.8                                               | 75.79                                                                                                               | 75.45                                                                                                               |
| 5     | 42.5                                               | 44.36                                                                                                               | 43.80                                                                                                               |
| 6     | 22.8                                               | 18.67                                                                                                               | 17.55                                                                                                               |
| 7     | 155.8                                              | 163.69                                                                                                              | 156.63                                                                                                              |
| 8     | 105.3                                              | 103.90                                                                                                              | 100.25                                                                                                              |
| 9     | 43.8                                               | 39.23                                                                                                               | 38.05                                                                                                               |
| 10    | 38.7                                               | 33.46                                                                                                               | 35.02                                                                                                               |
| 11    | 124.2                                              | 126.51                                                                                                              | 121.86                                                                                                              |
| 12    | 171.1                                              | 172.11                                                                                                              | 168.83                                                                                                              |
| 13    | 8.3                                                | 5.42                                                                                                                | 4.83                                                                                                                |
| 14    | 29.2                                               | 24.27                                                                                                               | 23.57                                                                                                               |
| 15    | 62.8                                               | 58.50                                                                                                               | 58.99                                                                                                               |
| 4-OAc | 20.8                                               | 17.29                                                                                                               | 17.09                                                                                                               |
|       | 170.7                                              | 172.53                                                                                                              | 170.57                                                                                                              |
| 1'    | 59.1                                               | 54.70                                                                                                               | 52.74                                                                                                               |
| 2'    | 15.1                                               | 10.92                                                                                                               | 10.81                                                                                                               |

<sup>a</sup> Recorded in  $\text{CDCl}_3$  at 600 MHz.<sup>b</sup> Calculated in  $\text{CDCl}_3$

**Table S7** DP4+ analyses of calculated and experimental NMR chemical shifts of **5** (unscaled). Isomer 1: 1*R*,4*S*,5*R*,8*S*,10*S*-**5**; Isomer 2: 1*S*,4*R*,5*S*,8*S*,10*R*-**5**

| Functional       | Solvent? |          | Basis Set   |          | Type of Data    |          |
|------------------|----------|----------|-------------|----------|-----------------|----------|
| mPW1PW91         | PCM      |          | 6-311G(d,p) |          | Unscaled Shifts |          |
|                  | Isomer 1 | Isomer 2 | Isomer 3    | Isomer 4 | Isomer 5        | Isomer 6 |
| sDP4+ (H data)   | 0.02%    | 99.98%   | -           | -        | -               | -        |
| sDP4+ (C data)   | 0.54%    | 99.46%   | -           | -        | -               | -        |
| sDP4+ (all data) | 0.00%    | 100.00%  | -           | -        | -               | -        |
| uDP4+ (H data)   | 0.00%    | 100.00%  | -           | -        | -               | -        |
| uDP4+ (C data)   | 100.00%  | 0.00%    | -           | -        | -               | -        |
| uDP4+ (all data) | 83.93%   | 16.07%   | -           | -        | -               | -        |
| DP4+ (H data)    | 0.00%    | 100.00%  | -           | -        | -               | -        |
| DP4+ (C data)    | 100.00%  | 0.00%    | -           | -        | -               | -        |
| DP4+ (all data)  | 0.00%    | 100.00%  | -           | -        | -               | -        |

| Functional |      | Solvent?     |            | Basis Set   |          | Type of Data    |          |
|------------|------|--------------|------------|-------------|----------|-----------------|----------|
| mPW1PW91   |      | PCM          |            | 6-311G(d,p) |          | Unscaled Shifts |          |
|            |      | DP4+         | 0.00%      | 100.00%     | -        | -               | -        |
| Nuclei     | sp2? | Experimental | Isomer 1   | Isomer 2    | Isomer 3 | Isomer 4        | Isomer 5 |
| C          |      | 79.5         | 76.0622    | 74.2513     |          |                 |          |
| C          | x    | 135.8        | 135.5422   | 134.1323    |          |                 |          |
| C          | x    | 129.2        | 137.2658   | 135.8851    |          |                 |          |
| C          |      | 79.8         | 75.7858    | 75.4483     |          |                 |          |
| C          |      | 42.5         | 44.3624    | 43.8035     |          |                 |          |
| C          |      | 22.8         | 18.672     | 17.5512     |          |                 |          |
| C          | x    | 155.8        | 163.688    | 156.6318    |          |                 |          |
| C          |      | 105.3        | 103.9016   | 100.2476    |          |                 |          |
| C          |      | 43.8         | 39.2282    | 38.0503     |          |                 |          |
| C          |      | 38.7         | 33.4624    | 35.0231     |          |                 |          |
| C          | x    | 124.2        | 126.5138   | 121.8617    |          |                 |          |
| C          | x    | 171.1        | 172.1056   | 168.8265    |          |                 |          |
| C          |      | 8.3          | 5.415      | 4.8285      |          |                 |          |
| C          |      | 29.2         | 24.2716    | 23.5731     |          |                 |          |
| C          |      | 62.8         | 58.5036    | 58.9896     |          |                 |          |
| C          |      | 20.8         | 17.287     | 17.0932     |          |                 |          |
| C          | x    | 170.7        | 172.532    | 170.5733    |          |                 |          |
| C          |      | 59.1         | 54.7042    | 52.7385     |          |                 |          |
| C          |      | 15.1         | 10.9158    | 10.8119     |          |                 |          |
| H          |      | 4.2          | 3.9644     | 4.0166      |          |                 |          |
| H          | x    | 6.74         | 7.0112     | 6.9858      |          |                 |          |
| H          | x    | 6.39         | 7.07       | 6.8478      |          |                 |          |
| H          |      | 2.53         | 1.60       | 1.938       |          |                 |          |
| H          |      | 2.47         | 2.73       | 2.6221      |          |                 |          |
| H          |      | 2.61         | 2.86       | 2.8192      |          |                 |          |
| H          |      | 1.4          | 2.1576     | 2.2344      |          |                 |          |
| H          |      | 2.26         | 3.2894     | 2.6024      |          |                 |          |
| H          |      | 1.79         | 1.945733   | 1.78239962  |          |                 |          |
| H          |      | 1.61         | 0.674466   | 1.18653329  |          |                 |          |
| H          |      | 4.37         | 3.6628     | 3.9216      |          |                 |          |
| H          |      | 4.43         | 4.8826     | 4.4979      |          |                 |          |
| H          |      | 2.17         | 2.2174662  | 2.17953314  |          |                 |          |
| H          |      | 3.15         | 3.3732     | 3.0254      |          |                 |          |
| H          |      | 3.46         | 3.6174     | 3.5878      |          |                 |          |
| H          |      | 1.21         | 1.27806666 | 1.23139956  |          |                 |          |

**Table S8** Energy analyses of 1*R*,7*R*,8*R*,10*S*,12*R*-6 (six conformers)

| NO.                                                                              | 3D conformers<br>B3LYP/6-31G(d,p)                                                   | E (Hartree)  | $\Delta E$<br>(KJ/mol) | Boltzmann<br>distribution |
|----------------------------------------------------------------------------------|-------------------------------------------------------------------------------------|--------------|------------------------|---------------------------|
| 1 <i>R</i> ,7 <i>R</i> ,8 <i>R</i> ,10 <i>S</i> ,12 <i>R</i> -6<br>(conformer 1) | 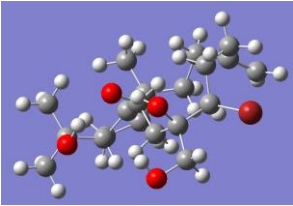   | -3654.063991 | 5.243121193            | 9.99%                     |
| 1 <i>R</i> ,7 <i>R</i> ,8 <i>R</i> ,10 <i>S</i> ,12 <i>R</i> -6<br>(conformer 2) |   | -3654.016987 | 128.6520689            | 0.00%                     |
| 1 <i>R</i> ,7 <i>R</i> ,8 <i>R</i> ,10 <i>S</i> ,12 <i>R</i> -6<br>(conformer 3) |  | -3654.063212 | 7.288384793            | 4.38%                     |
| 1 <i>R</i> ,7 <i>R</i> ,8 <i>R</i> ,10 <i>S</i> ,12 <i>R</i> -6<br>(conformer 4) |  | -3654.060185 | 15.2357698             | 0.18%                     |

---

*1R,7R,8R,10S,12R-6*  
(conformer 5)

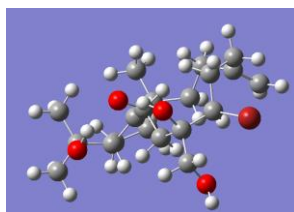

-3654.065988      0      82.81%

---

*1R,7R,8R,10S,12R-6*  
(conformer 6)

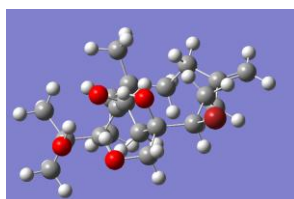

-3654.062738      8.532871245      2.65%

---

**Table S9** Cartesian coordinates of the low-energy re-optimized conformers of **1*R*,7*R*,8*R*,10*S*,12*R*-6** calculated at B3LYP/6-31G(d,p) level of theory

| 1 <i>R</i> ,7 <i>R</i> ,8 <i>R</i> ,10 <i>S</i> ,12 <i>R</i> -6 (conformer 1) |                           |           |           |        |                           |           |           |
|-------------------------------------------------------------------------------|---------------------------|-----------|-----------|--------|---------------------------|-----------|-----------|
| Atomic                                                                        | Standard Orientation (Å ) |           |           | Atomic | Standard Orientation (Å ) |           |           |
| Type                                                                          | X                         | Y         | Z         | Type   | X                         | Y         | Z         |
| C                                                                             | 2.119118                  | 0.819963  | 1.209604  | H      | -1.779646                 | 3.858751  | -0.684575 |
| C                                                                             | 2.324363                  | 2.32985   | 0.937619  | H      | 2.223916                  | 0.46707   | -0.939718 |
| C                                                                             | 1.302484                  | 2.958018  | 0.000753  | H      | 0.138285                  | 0.969146  | -0.420426 |
| C                                                                             | -0.131595                 | 3.081214  | 0.523357  | H      | -0.395416                 | -2.03342  | -0.802196 |
| C                                                                             | -1.27458                  | 2.897543  | -0.526553 | H      | 0.482626                  | -0.967847 | -1.907779 |
| C                                                                             | 2.382829                  | -0.082604 | -0.011045 | H      | -4.12088                  | 2.646917  | -1.307613 |
| C                                                                             | -2.383359                 | 1.861369  | -0.191344 | H      | -2.913804                 | 1.827079  | -2.302317 |
| C                                                                             | -1.912798                 | 0.379138  | -0.167606 | H      | -4.619893                 | 0.107473  | -2.086865 |
| C                                                                             | -0.479181                 | 0.085908  | -0.335052 | H      | -4.933655                 | 0.527329  | -0.410948 |
| C                                                                             | 0.225893                  | -1.137586 | -0.853585 | H      | -2.638102                 | -1.060013 | -1.573805 |
| C                                                                             | 1.547243                  | -1.404724 | -0.060772 | H      | 0.974002                  | 3.883014  | -1.890391 |
| C                                                                             | -3.429611                 | 1.796904  | -1.332704 | H      | 2.704016                  | 3.344672  | -1.540958 |
| C                                                                             | -4.141089                 | 0.44191   | -1.161658 | H      | -4.768272                 | -3.447274 | 0.142737  |
| C                                                                             | -3.039193                 | -0.54569  | -0.691654 | H      | -4.057301                 | -2.979248 | -1.410526 |
| C                                                                             | 1.672745                  | 3.411775  | -1.203746 | H      | -5.422105                 | -2.052164 | -0.74242  |
| C                                                                             | -3.509435                 | -1.695235 | 0.253833  | H      | -4.37085                  | -2.090706 | 2.188046  |
| C                                                                             | -4.504497                 | -2.592853 | -0.488546 | H      | -3.400614                 | -0.610027 | 2.150433  |
| C                                                                             | -4.115312                 | -1.214788 | 1.583213  | H      | -5.028483                 | -0.626627 | 1.442259  |
| O                                                                             | -2.388657                 | -2.544135 | 0.544723  | H      | -1.76005                  | -1.98873  | 1.037367  |
| C                                                                             | -3.06806                  | 2.238956  | 1.138514  | H      | -2.384669                 | 2.133061  | 1.985847  |
| O                                                                             | -1.104523                 | -0.020226 | 0.983827  | H      | -3.404695                 | 3.281869  | 1.099007  |
| C                                                                             | 2.281255                  | -2.595915 | -0.708096 | H      | -3.942312                 | 1.616623  | 1.34627   |
| O                                                                             | 1.240376                  | -1.882372 | 1.256456  | H      | 2.612228                  | -2.340805 | -1.718889 |
| O                                                                             | 1.431503                  | -3.72259  | -0.816288 | H      | 3.16906                   | -2.819886 | -0.104663 |
| Br                                                                            | 4.378164                  | -0.366482 | -0.096317 | H      | 0.512859                  | -1.348754 | 1.614611  |
| H                                                                             | 1.100705                  | 0.664821  | 1.576118  | H      | 1.097119                  | -3.882862 | 0.082739  |
| H                                                                             | 2.775682                  | 0.503877  | 2.024522  |        |                           |           |           |
| H                                                                             | 3.333837                  | 2.484692  | 0.540506  |        |                           |           |           |
| H                                                                             | 2.283375                  | 2.845129  | 1.908192  |        |                           |           |           |
| H                                                                             | -0.228921                 | 4.069079  | 0.994626  |        |                           |           |           |
| H                                                                             | -0.26628                  | 2.368192  | 1.342011  |        |                           |           |           |
| H                                                                             | -0.840411                 | 2.632096  | -1.497034 |        |                           |           |           |

| 1 <i>R</i> ,7 <i>R</i> ,8 <i>R</i> ,10 <i>S</i> ,12 <i>R</i> -6 (conformer 2) |                           |           |           |        |                           |           |           |
|-------------------------------------------------------------------------------|---------------------------|-----------|-----------|--------|---------------------------|-----------|-----------|
| Atomic                                                                        | Standard Orientation (Å ) |           |           | Atomic | Standard Orientation (Å ) |           |           |
| Type                                                                          | X                         | Y         | Z         | Type   | X                         | Y         | Z         |
| C                                                                             | 2.659352                  | 0.994019  | -1.216181 | H      | -0.885992                 | 3.655686  | -0.200797 |
| C                                                                             | 2.951429                  | 1.939896  | -0.006475 | H      | 2.463075                  | -1.038049 | -1.902749 |
| C                                                                             | 1.883223                  | 2.980733  | 0.282362  | H      | -0.528714                 | -0.077124 | 1.407973  |
| C                                                                             | 0.565911                  | 2.50069   | 0.890134  | H      | -0.26872                  | -1.270115 | -1.343165 |
| C                                                                             | -0.616437                 | 2.595816  | -0.103426 | H      | 0.188053                  | 0.401375  | -1.024506 |
| C                                                                             | 2.567268                  | -0.520168 | -0.94487  | H      | -3.437003                 | 3.355144  | -0.465996 |
| C                                                                             | -1.958033                 | 1.861033  | 0.198848  | H      | -2.586517                 | 2.52871   | -1.773056 |
| C                                                                             | -2.045213                 | 0.3462    | 0.036409  | H      | -4.679619                 | 1.308104  | -1.774205 |
| C                                                                             | -1.04296                  | -0.597425 | 0.575459  | H      | -4.806758                 | 1.365475  | -0.01973  |
| C                                                                             | 0.080152                  | -0.578718 | -0.569512 | H      | -2.858625                 | -0.276041 | -1.708489 |
| C                                                                             | 1.4701                    | -1.05288  | 0.013029  | H      | 1.356684                  | 5.040044  | 0.286128  |
| C                                                                             | -3.041402                 | 2.384923  | -0.783939 | H      | 3.031057                  | 4.63817   | -0.382133 |
| C                                                                             | -4.096734                 | 1.282325  | -0.850641 | H      | -5.81029                  | -2.381434 | -1.127553 |
| C                                                                             | -3.282656                 | -0.023618 | -0.714003 | H      | -5.017269                 | -1.368602 | -2.340537 |
| C                                                                             | 2.098559                  | 4.280171  | 0.047421  | H      | -6.044603                 | -0.622264 | -1.087804 |
| C                                                                             | -4.094663                 | -1.347628 | -0.364243 | H      | -5.154999                 | -2.231178 | 1.297819  |
| C                                                                             | -5.319207                 | -1.417131 | -1.288314 | H      | -3.644356                 | -1.42689  | 1.757336  |
| C                                                                             | -4.526765                 | -1.352984 | 1.115447  | H      | -5.107463                 | -0.461905 | 1.385777  |
| O                                                                             | -3.313833                 | -2.467849 | -0.672453 | H      | -2.524184                 | -2.425615 | -0.048274 |
| C                                                                             | -2.411177                 | 2.127934  | 1.670508  | H      | -1.685652                 | 1.738074  | 2.388301  |
| O                                                                             | -1.415476                 | -1.840982 | 0.926598  | H      | -2.498528                 | 3.211331  | 1.811891  |
| C                                                                             | 1.48016                   | -2.613122 | 0.139078  | H      | -3.383675                 | 1.678738  | 1.895656  |
| O                                                                             | 1.681684                  | -0.538265 | 1.310808  | H      | 0.964718                  | -3.065949 | -0.719363 |
| O                                                                             | 0.897234                  | -2.985191 | 1.369601  | H      | 2.512458                  | -2.967471 | 0.15416   |
| Br                                                                            | 4.380223                  | -1.099531 | -0.308892 | H      | 1.486557                  | -1.311932 | 1.893766  |
| H                                                                             | 3.457452                  | 1.116106  | -1.954843 | H      | -0.07129                  | -2.714999 | 1.300437  |
| H                                                                             | 1.747888                  | 1.311508  | -1.736123 |        |                           |           |           |
| H                                                                             | 3.894435                  | 2.460536  | -0.200247 |        |                           |           |           |
| H                                                                             | 3.110745                  | 1.329079  | 0.886727  |        |                           |           |           |
| H                                                                             | 0.332478                  | 3.115272  | 1.768212  |        |                           |           |           |
| H                                                                             | 0.708359                  | 1.483906  | 1.25525   |        |                           |           |           |
| H                                                                             | -0.289784                 | 2.303799  | -1.107619 |        |                           |           |           |

| 1 <i>R</i> ,7 <i>R</i> ,8 <i>R</i> ,10 <i>S</i> ,12 <i>R</i> -6 (conformer 3) |                           |           |           |        |                           |           |           |
|-------------------------------------------------------------------------------|---------------------------|-----------|-----------|--------|---------------------------|-----------|-----------|
| Atomic                                                                        | Standard Orientation (Å ) |           |           | Atomic | Standard Orientation (Å ) |           |           |
| Type                                                                          | X                         | Y         | Z         | Type   | X                         | Y         | Z         |
| C                                                                             | 2.301052                  | 1.37567   | -0.137433 | H      | -2.402785                 | 3.570023  | -0.179323 |
| C                                                                             | 1.284102                  | 2.05842   | -1.090822 | H      | 2.640455                  | -0.196729 | -1.610377 |
| C                                                                             | 0.712649                  | 3.345712  | -0.525528 | H      | 0.052068                  | 0.589932  | 1.128676  |
| C                                                                             | -0.388581                 | 3.206484  | 0.509258  | H      | -0.192869                 | -2.039956 | -0.289747 |
| C                                                                             | -1.739069                 | 2.701385  | -0.089418 | H      | 0.230476                  | -0.73696  | -1.353865 |
| C                                                                             | 2.64836                   | -0.077806 | -0.523477 | H      | -4.626319                 | 1.008302  | 0.762689  |
| C                                                                             | -2.53205                  | 1.586258  | 0.669819  | H      | -4.374412                 | 2.487933  | -0.161419 |
| C                                                                             | -1.948569                 | 0.182171  | 0.32772   | H      | -3.413686                 | 1.237678  | -2.037484 |
| C                                                                             | -0.529781                 | -0.136863 | 0.57823   | H      | -4.749576                 | 0.215779  | -1.543949 |
| C                                                                             | 0.289994                  | -1.059725 | -0.306174 | H      | -2.089586                 | -0.646433 | -1.674895 |
| C                                                                             | 1.788168                  | -1.198352 | 0.11512   | H      | 0.766496                  | 5.466507  | -0.508434 |
| C                                                                             | -3.951517                 | 1.499871  | 0.052043  | H      | 1.937968                  | 4.640949  | -1.67638  |
| C                                                                             | -3.796252                 | 0.633193  | -1.2071   | H      | -4.327369                 | -3.492201 | -1.586979 |
| C                                                                             | -2.763054                 | -0.463793 | -0.829012 | H      | -3.127706                 | -2.59987  | -2.536671 |
| C                                                                             | 1.159611                  | 4.541315  | -0.923203 | H      | -4.736881                 | -1.89874  | -2.253172 |
| C                                                                             | -3.402631                 | -1.863781 | -0.51257  | H      | -4.868304                 | -2.81782  | 0.749991  |
| C                                                                             | -3.935398                 | -2.49348  | -1.804445 | H      | -4.138416                 | -1.385751 | 1.491555  |
| C                                                                             | -4.513448                 | -1.801616 | 0.550247  | H      | -5.369645                 | -1.201278 | 0.2247    |
| O                                                                             | -2.388208                 | -2.774317 | -0.056872 | H      | -2.046694                 | -2.366213 | 0.762849  |
| C                                                                             | -2.594009                 | 1.859361  | 2.177618  | H      | -1.60872                  | 1.829605  | 2.652345  |
| O                                                                             | -1.562703                 | -0.691263 | 1.429992  | H      | -3.028007                 | 2.849365  | 2.363976  |
| C                                                                             | 2.269142                  | -2.607701 | -0.31836  | H      | -3.216077                 | 1.114297  | 2.682798  |
| O                                                                             | 1.915847                  | -1.104348 | 1.524028  | H      | 2.069586                  | -2.777918 | -1.38579  |
| O                                                                             | 1.658029                  | -3.605849 | 0.498794  | H      | 3.340506                  | -2.698307 | -0.14196  |
| Br                                                                            | 4.582684                  | -0.36474  | -0.054195 | H      | 1.716695                  | -1.999142 | 1.858828  |
| H                                                                             | 1.967209                  | 1.392301  | 0.90392   | H      | 0.76531                   | -3.787046 | 0.164398  |
| H                                                                             | 3.21596                   | 1.971617  | -0.164193 |        |                           |           |           |
| H                                                                             | 0.459418                  | 1.378171  | -1.326659 |        |                           |           |           |
| H                                                                             | 1.791148                  | 2.263051  | -2.041622 |        |                           |           |           |
| H                                                                             | -0.549937                 | 4.175754  | 0.992756  |        |                           |           |           |
| H                                                                             | -0.046176                 | 2.540238  | 1.307221  |        |                           |           |           |
| H                                                                             | -1.570129                 | 2.364647  | -1.119561 |        |                           |           |           |

| 1 <i>R</i> ,7 <i>R</i> ,8 <i>R</i> ,10 <i>S</i> ,12 <i>R</i> -6 (conformer 4) |                           |           |           |        |                           |           |           |
|-------------------------------------------------------------------------------|---------------------------|-----------|-----------|--------|---------------------------|-----------|-----------|
| Atomic                                                                        | Standard Orientation (Å ) |           |           | Atomic | Standard Orientation (Å ) |           |           |
| Type                                                                          | X                         | Y         | Z         | Type   | X                         | Y         | Z         |
| C                                                                             | 2.288735                  | 1.333555  | -0.126005 | H      | -2.398753                 | 3.503108  | -0.454375 |
| C                                                                             | 1.306178                  | 1.930251  | -1.168793 | H      | 2.732142                  | -0.355969 | -1.442904 |
| C                                                                             | 0.719509                  | 3.259928  | -0.73245  | H      | 0.031291                  | 0.661281  | 1.067196  |
| C                                                                             | -0.396346                 | 3.209185  | 0.294693  | H      | -0.198659                 | -2.108413 | -0.111152 |
| C                                                                             | -1.736192                 | 2.647453  | -0.276203 | H      | 0.243208                  | -0.896598 | -1.265601 |
| C                                                                             | 2.654473                  | -0.14097  | -0.376584 | H      | -4.644103                 | 1.063437  | 0.699013  |
| C                                                                             | -2.541224                 | 1.603234  | 0.567582  | H      | -4.367241                 | 2.454112  | -0.3472   |
| C                                                                             | -1.968782                 | 0.169394  | 0.340746  | H      | -3.409556                 | 1.03325   | -2.101188 |
| C                                                                             | -0.546061                 | -0.123184 | 0.596908  | H      | -4.76777                  | 0.080223  | -1.534562 |
| C                                                                             | 0.27602                   | -1.125693 | -0.195089 | H      | -2.133481                 | -0.8512   | -1.567824 |
| C                                                                             | 1.762529                  | -1.236597 | 0.264558  | H      | 0.761603                  | 5.374038  | -0.906831 |
| C                                                                             | -3.959314                 | 1.482406  | -0.0473   | H      | 1.955453                  | 4.453759  | -1.977433 |
| C                                                                             | -3.809943                 | 0.50878   | -1.225906 | H      | -4.442322                 | -3.615573 | -1.200787 |
| C                                                                             | -2.800738                 | -0.569411 | -0.74503  | H      | -3.241701                 | -2.837586 | -2.244366 |
| C                                                                             | 1.166206                  | 4.417693  | -1.229933 | H      | -4.834825                 | -2.082846 | -2.005136 |
| C                                                                             | -3.471706                 | -1.915737 | -0.292525 | H      | -4.94438                  | -2.712784 | 1.066287  |
| C                                                                             | -4.036555                 | -2.648631 | -1.51508  | H      | -4.171845                 | -1.238029 | 1.667161  |
| C                                                                             | -4.568083                 | -1.72799  | 0.771047  | H      | -5.413917                 | -1.138709 | 0.40084   |
| O                                                                             | -2.474992                 | -2.804127 | 0.230116  | H      | -2.095531                 | -2.329942 | 0.994182  |
| C                                                                             | -2.606669                 | 1.995805  | 2.048668  | H      | -1.624075                 | 1.993591  | 2.529811  |
| O                                                                             | -1.565525                 | -0.602651 | 1.51379   | H      | -3.030785                 | 3.001918  | 2.153822  |
| C                                                                             | 2.271311                  | -2.639383 | -0.121251 | H      | -3.239571                 | 1.299988  | 2.607924  |
| O                                                                             | 1.865847                  | -1.0891   | 1.679633  | H      | 3.303944                  | -2.754866 | 0.223281  |
| O                                                                             | 2.160086                  | -2.782223 | -1.533592 | H      | 1.645614                  | -3.380767 | 0.403794  |
| Br                                                                            | 4.550767                  | -0.384484 | 0.260913  | H      | 1.184432                  | -1.646173 | 2.089917  |
| H                                                                             | 1.920244                  | 1.439598  | 0.898541  | H      | 2.644733                  | -3.578424 | -1.79578  |
| H                                                                             | 3.202995                  | 1.929588  | -0.172224 |        |                           |           |           |
| H                                                                             | 0.489842                  | 1.230896  | -1.376071 |        |                           |           |           |
| H                                                                             | 1.845749                  | 2.054682  | -2.115266 |        |                           |           |           |
| H                                                                             | -0.567985                 | 4.217141  | 0.68711   |        |                           |           |           |
| H                                                                             | -0.063886                 | 2.619259  | 1.154835  |        |                           |           |           |
| H                                                                             | -1.551136                 | 2.219242  | -1.268859 |        |                           |           |           |

| 1 <i>R</i> ,7 <i>R</i> ,8 <i>R</i> ,10 <i>S</i> ,12 <i>R</i> -6 (conformer 5) |                           |           |           |        |                           |           |           |
|-------------------------------------------------------------------------------|---------------------------|-----------|-----------|--------|---------------------------|-----------|-----------|
| Atomic                                                                        | Standard Orientation (Å ) |           |           | Atomic | Standard Orientation (Å ) |           |           |
| Type                                                                          | X                         | Y         | Z         | Type   | X                         | Y         | Z         |
| C                                                                             | -2.018357                 | 0.805505  | -1.284758 | H      | 1.838992                  | 3.756181  | 0.809724  |
| C                                                                             | -2.216813                 | 2.312392  | -0.99123  | H      | -2.198128                 | 0.408641  | 0.856125  |
| C                                                                             | -1.221681                 | 2.909697  | -0.006957 | H      | -0.08583                  | 0.887533  | 0.395643  |
| C                                                                             | 0.229012                  | 3.031084  | -0.479895 | H      | 0.430597                  | -2.126741 | 0.620317  |
| C                                                                             | 1.334813                  | 2.804301  | 0.600506  | H      | -0.452567                 | -1.133768 | 1.798121  |
| C                                                                             | -2.324083                 | -0.11625  | -0.09108  | H      | 4.153083                  | 2.503985  | 1.461769  |
| C                                                                             | 2.447301                  | 1.773804  | 0.262084  | H      | 2.911051                  | 1.653495  | 2.385378  |
| C                                                                             | 1.96813                   | 0.297194  | 0.166411  | H      | 4.612455                  | -0.06817  | 2.155605  |
| C                                                                             | 0.52938                   | 0.004971  | 0.286016  | H      | 4.983646                  | 0.416301  | 0.509267  |
| C                                                                             | -0.19146                  | -1.234524 | 0.737405  | H      | 2.646171                  | -1.20437  | 1.531196  |
| C                                                                             | -1.521381                 | -1.460291 | -0.05216  | H      | -0.946781                 | 3.783887  | 1.916222  |
| C                                                                             | 3.456814                  | 1.658175  | 1.431862  | H      | -2.669393                 | 3.271692  | 1.49793   |
| C                                                                             | 4.16614                   | 0.306277  | 1.229444  | H      | 4.821005                  | -3.524271 | -0.22181  |
| C                                                                             | 3.075212                  | -0.654595 | 0.684251  | H      | 4.069487                  | -3.117796 | 1.329823  |
| C                                                                             | -1.627215                 | 3.337236  | 1.195658  | H      | 5.453855                  | -2.16901  | 0.73759   |
| C                                                                             | 3.569756                  | -1.764693 | -0.294898 | H      | 4.486024                  | -2.081597 | -2.218496 |
| C                                                                             | 4.542238                  | -2.695531 | 0.436698  | H      | 3.515518                  | -0.602249 | -2.14693  |
| C                                                                             | 4.213649                  | -1.231098 | -1.58539  | H      | 5.122526                  | -0.650596 | -1.393821 |
| O                                                                             | 2.456306                  | -2.597772 | -0.651914 | H      | 1.842776                  | -2.022788 | -1.14177  |
| C                                                                             | 3.175645                  | 2.197593  | -1.030348 | H      | 2.51889                   | 2.127965  | -1.902175 |
| O                                                                             | 1.187236                  | -0.050969 | -1.019014 | H      | 3.515657                  | 3.236306  | -0.940482 |
| C                                                                             | -2.278839                 | -2.615686 | 0.63699   | H      | 4.053172                  | 1.578727  | -1.234362 |
| O                                                                             | -1.265474                 | -1.946495 | -1.366396 | H      | -3.116422                 | -2.909533 | -0.005765 |
| O                                                                             | -2.697877                 | -2.297126 | 1.95257   | H      | -1.593106                 | -3.464542 | 0.711573  |
| Br                                                                            | -4.335055                 | -0.387066 | -0.086847 | H      | -0.543403                 | -1.42306  | -1.748466 |
| H                                                                             | -0.991055                 | 0.64456   | -1.623781 | H      | -3.517779                 | -1.781168 | 1.863853  |
| H                                                                             | -2.652227                 | 0.510744  | -2.125366 |        |                           |           |           |
| H                                                                             | -3.237766                 | 2.47122   | -0.625935 |        |                           |           |           |
| H                                                                             | -2.136908                 | 2.845591  | -1.949559 |        |                           |           |           |
| H                                                                             | 0.35227                   | 4.030327  | -0.920158 |        |                           |           |           |
| H                                                                             | 0.382695                  | 2.338958  | -1.312971 |        |                           |           |           |
| H                                                                             | 0.867325                  | 2.506394  | 1.545748  |        |                           |           |           |

| 1 <i>R</i> ,7 <i>R</i> ,8 <i>R</i> ,10 <i>S</i> ,12 <i>R</i> -6 (conformer 6) |                           |           |           |        |                           |           |           |
|-------------------------------------------------------------------------------|---------------------------|-----------|-----------|--------|---------------------------|-----------|-----------|
| Atomic                                                                        | Standard Orientation (Å ) |           |           | Atomic | Standard Orientation (Å ) |           |           |
| Type                                                                          | X                         | Y         | Z         | Type   | X                         | Y         | Z         |
| C                                                                             | 2.29113                   | 1.369772  | 0.147809  | H      | -2.400185                 | 3.560229  | -0.112455 |
| C                                                                             | 1.258383                  | 2.037489  | -1.092014 | H      | 2.604335                  | -0.219213 | -1.611614 |
| C                                                                             | 0.699564                  | 3.326553  | -0.520277 | H      | 0.03472                   | 0.525782  | 1.181673  |
| C                                                                             | -0.37729                  | 3.181427  | 0.537464  | H      | -0.12828                  | -2.119193 | -0.20335  |
| C                                                                             | -1.737365                 | 2.688698  | -0.045919 | H      | 0.222594                  | -0.827483 | -1.316444 |
| C                                                                             | 2.641069                  | -0.08253  | -0.528031 | H      | -4.616221                 | 0.984633  | 0.79972   |
| C                                                                             | -2.522403                 | 1.564271  | 0.705895  | H      | -4.370971                 | 2.493911  | -0.077797 |
| C                                                                             | -1.953194                 | 0.159559  | 0.334782  | H      | -3.414801                 | 1.301842  | -1.998017 |
| C                                                                             | -0.54171                  | -0.186924 | 0.605115  | H      | -4.755082                 | 0.272309  | -1.534424 |
| C                                                                             | 0.296516                  | -1.114865 | -0.259354 | H      | -2.101975                 | -0.610347 | -1.692386 |
| C                                                                             | 1.807121                  | -1.195555 | 0.153603  | H      | 0.751762                  | 5.447179  | -0.506224 |
| C                                                                             | -3.947118                 | 1.49908   | 0.100132  | H      | 1.894661                  | 4.621681  | -1.702474 |
| C                                                                             | -3.79891                  | 0.67331   | -1.186462 | H      | -4.391492                 | -3.416993 | -1.68987  |
| C                                                                             | -2.773931                 | -0.442634 | -0.842108 | H      | -3.189071                 | -2.508187 | -2.618889 |
| C                                                                             | 1.135581                  | 4.522056  | -0.92982  | H      | -4.787543                 | -1.796778 | -2.297481 |
| C                                                                             | -3.434805                 | -1.841416 | -0.567336 | H      | -4.907407                 | -2.815053 | 0.670393  |
| C                                                                             | -3.989426                 | -2.416097 | -1.876832 | H      | -4.150867                 | -1.421889 | 1.457438  |
| C                                                                             | -4.538894                 | -1.797503 | 0.50466   | H      | -5.388661                 | -1.173655 | 0.207174  |
| O                                                                             | -2.437042                 | -2.783802 | -0.159159 | H      | -2.07347                  | -2.424347 | 0.672175  |
| C                                                                             | -2.565561                 | 1.814668  | 2.2179    | H      | -1.574756                 | 1.772596  | 2.680606  |
| O                                                                             | -1.601643                 | -0.742093 | 1.423358  | H      | -2.991202                 | 2.804408  | 2.424405  |
| C                                                                             | 2.308869                  | -2.600003 | -0.241092 | H      | -3.185761                 | 1.065333  | 2.718761  |
| O                                                                             | 1.956337                  | -1.047226 | 1.557252  | H      | 2.114303                  | -2.79012  | -1.307578 |
| O                                                                             | 1.587637                  | -3.516822 | 0.58732   | H      | 3.383371                  | -2.672505 | -0.054592 |
| Br                                                                            | 4.596668                  | -0.342294 | -0.115053 | H      | 1.688291                  | -1.905156 | 1.93437   |
| H                                                                             | 1.965936                  | 1.388837  | 0.896017  | H      | 2.049156                  | -4.36748  | 0.575645  |
| H                                                                             | 3.200827                  | 1.972673  | -0.187344 |        |                           |           |           |
| H                                                                             | 0.431194                  | 1.351638  | -1.303083 |        |                           |           |           |
| H                                                                             | 1.747052                  | 2.234784  | -2.053976 |        |                           |           |           |
| H                                                                             | -0.525285                 | 4.144748  | 1.03696   |        |                           |           |           |
| H                                                                             | -0.02237                  | 2.501078  | 1.317831  |        |                           |           |           |
| H                                                                             | -1.584274                 | 2.368463  | -1.083471 |        |                           |           |           |

**Table S10** Energy analyses of 1*R*,7*R*,8*S*,10*S*,12*R*-**6** (eight conformers)

| NO.                                                                                      | 3D conformers<br>B3LYP/6-31G(d,p)                                                   | E (Hartree)  | $\Delta E$<br>(KJ/mol) | Boltzmann<br>distribution |
|------------------------------------------------------------------------------------------|-------------------------------------------------------------------------------------|--------------|------------------------|---------------------------|
| 1 <i>R</i> ,7 <i>R</i> ,8 <i>S</i> ,10 <i>S</i> ,12 <i>R</i> - <b>6</b><br>(conformer 1) | 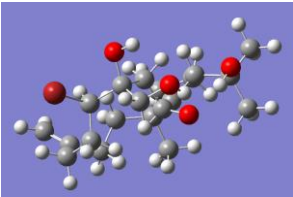   | -3654.064038 | 0.270426381            | 45.59%                    |
| 1 <i>R</i> ,7 <i>R</i> ,8 <i>S</i> ,10 <i>S</i> ,12 <i>R</i> - <b>6</b><br>(conformer 2) |   | -3654.059541 | 12.07729469            | 0.39%                     |
| 1 <i>R</i> ,7 <i>R</i> ,8 <i>S</i> ,10 <i>S</i> ,12 <i>R</i> - <b>6</b><br>(conformer 3) |  | -3654.059542 | 12.07466919            | 0.39%                     |
| 1 <i>R</i> ,7 <i>R</i> ,8 <i>S</i> ,10 <i>S</i> ,12 <i>R</i> - <b>6</b><br>(conformer 4) |  | -3654.061290 | 7.485297206            | 2.48%                     |

---

1*R*,7*R*,8*S*,10*S*,12*R*-6  
(conformer 5)

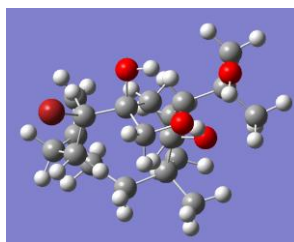

-3654.059215    12.93320731    0.28%

---

1*R*,7*R*,8*S*,10*S*,12*R*-6  
(conformer 6)

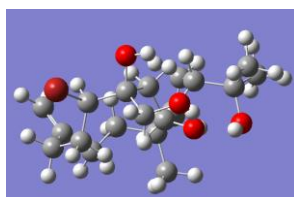

-3654.053768    27.23429952    0.00%

---

1*R*,7*R*,8*S*,10*S*,12*R*-6  
(conformer 7)

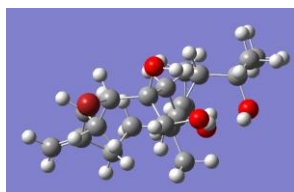

-3654.056647    19.67548834    0.02%

---

1*R*,7*R*,8*S*,10*S*,12*R*-6  
(conformer 8)

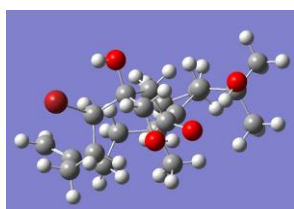

-3654.064141    0    50.85%

---

**Table S11** Cartesian coordinates of the low-energy re-optimized conformers of **1R,7R,8S,10S,12R-6** calculated at B3LYP/6-31G(d,p) level of theory.

| 1R,7R,8S,10S,12R-6 (conformer 1) |           |           |           |                                  |           |           |           |
|----------------------------------|-----------|-----------|-----------|----------------------------------|-----------|-----------|-----------|
| Atomic Standard Orientation (Å ) |           |           |           | Atomic Standard Orientation (Å ) |           |           |           |
| Type                             | X         | Y         | Z         | Type                             | X         | Y         | Z         |
| C                                | 2.076147  | 0.801367  | 1.119422  | H                                | -1.993835 | 3.915337  | -0.421708 |
| C                                | 2.212506  | 2.338556  | 0.952384  | H                                | 2.403813  | 0.618035  | -1.038916 |
| C                                | 1.16328   | 3.019355  | 0.081804  | H                                | 0.10288   | 1.130389  | -0.446006 |
| C                                | -0.259492 | 3.114993  | 0.64822   | H                                | -0.375715 | -1.810226 | -1.143132 |
| C                                | -1.439728 | 2.969683  | -0.372164 | H                                | 0.463183  | -0.589661 | -2.099991 |
| C                                | 2.443417  | -0.011749 | -0.147433 | H                                | -4.306977 | 2.558944  | -1.119427 |
| C                                | -2.482542 | 1.851121  | -0.085736 | H                                | -3.069607 | 1.883487  | -2.183679 |
| C                                | -1.91044  | 0.414872  | -0.160537 | H                                | -4.647908 | 0.035025  | -2.012706 |
| C                                | -0.471737 | 0.217942  | -0.393236 | H                                | -4.929425 | 0.341829  | -0.306425 |
| C                                | 0.24147   | -0.911517 | -1.075162 | H                                | -2.55734  | -0.985701 | -1.636462 |
| C                                | 1.61663   | -1.298134 | -0.439171 | H                                | 0.787003  | 4.07047   | -1.732936 |
| C                                | -3.553741 | 1.767634  | -1.204364 | H                                | 2.525277  | 3.512761  | -1.465755 |
| C                                | -4.160948 | 0.352544  | -1.085583 | H                                | -4.249652 | -3.744995 | -0.023766 |
| C                                | -2.970295 | -0.570907 | -0.70823  | H                                | -3.51998  | -3.142523 | -1.522884 |
| C                                | 1.50338   | 3.555508  | -1.097543 | H                                | -5.048739 | -2.44758  | -0.937396 |
| C                                | -3.288438 | -1.818427 | 0.182658  | H                                | -4.140471 | -2.408221 | 2.0706    |
| C                                | -4.077684 | -2.848132 | -0.62748  | H                                | -3.455344 | -0.776709 | 2.09875   |
| C                                | -4.024658 | -1.487288 | 1.490719  | H                                | -5.022111 | -1.070377 | 1.316949  |
| O                                | -2.044388 | -2.466808 | 0.536665  | H                                | -1.547968 | -1.775003 | 1.018702  |
| C                                | -3.158059 | 2.104522  | 1.278337  | H                                | -2.448321 | 1.997345  | 2.103625  |
| O                                | -1.042159 | 0.006422  | 0.935347  | H                                | -3.564612 | 3.122514  | 1.307605  |
| C                                | 1.441149  | -2.197866 | 0.805678  | H                                | -3.984326 | 1.413736  | 1.467453  |
| O                                | 0.87575   | -3.452473 | 0.427783  | H                                | 0.845959  | -1.708683 | 1.584763  |
| O                                | 2.29917   | -2.063556 | -1.422093 | H                                | 2.433789  | -2.416303 | 1.210166  |
| Br                               | 4.396272  | -0.440501 | -0.030921 | H                                | -0.092483 | -3.355416 | 0.360765  |
| H                                | 1.0656    | 0.561442  | 1.45587   | H                                | 1.973267  | -2.974373 | -1.290289 |
| H                                | 2.738372  | 0.490171  | 1.932078  |                                  |           |           |           |
| H                                | 3.212281  | 2.555266  | 0.558324  |                                  |           |           |           |
| H                                | 2.17046   | 2.777852  | 1.959566  |                                  |           |           |           |
| H                                | -0.344312 | 4.084146  | 1.158559  |                                  |           |           |           |
| H                                | -0.365704 | 2.369101  | 1.441129  |                                  |           |           |           |
| H                                | -1.034842 | 2.812299  | -1.378299 |                                  |           |           |           |

| 1 <i>R</i> ,7 <i>R</i> ,8 <i>S</i> ,10 <i>S</i> ,12 <i>R</i> -6 (conformer 2) |                           |           |           |        |                           |           |           |
|-------------------------------------------------------------------------------|---------------------------|-----------|-----------|--------|---------------------------|-----------|-----------|
| Atomic                                                                        | Standard Orientation (Å ) |           |           | Atomic | Standard Orientation (Å ) |           |           |
| Type                                                                          | X                         | Y         | Z         | Type   | X                         | Y         | Z         |
| C                                                                             | 2.50924                   | 1.511507  | 0.346047  | H      | -2.505186                 | 3.654086  | 0.607604  |
| C                                                                             | 1.951762                  | 2.665814  | -0.531629 | H      | 2.723666                  | 0.309601  | -1.471866 |
| C                                                                             | 0.471306                  | 2.657347  | -0.874842 | H      | 0.037213                  | 0.753108  | 1.018673  |
| C                                                                             | -0.455874                 | 3.144326  | 0.234768  | H      | -0.09239                  | -1.75299  | -0.710627 |
| C                                                                             | -1.964046                 | 2.814236  | 0.153146  | H      | 0.399495                  | -0.264033 | -1.477616 |
| C                                                                             | 2.7505                    | 0.167133  | -0.390291 | H      | -4.571067                 | 0.804067  | 1.143132  |
| C                                                                             | -2.542183                 | 1.538863  | 0.858164  | H      | -4.523879                 | 2.38201   | 0.356234  |
| C                                                                             | -1.928383                 | 0.216116  | 0.319133  | H      | -3.731745                 | 1.396892  | -1.742549 |
| C                                                                             | -0.482984                 | -0.008222 | 0.450207  | H      | -4.922166                 | 0.230968  | -1.2062   |
| C                                                                             | 0.377392                  | -0.786    | -0.515611 | H      | -2.232726                 | -0.395585 | -1.73403  |
| C                                                                             | 1.848452                  | -1.050855 | -0.071529 | H      | -0.97898                  | 2.373544  | -2.416012 |
| C                                                                             | -4.020335                 | 1.410109  | 0.414247  | H      | 0.777979                  | 2.106912  | -2.89413  |
| C                                                                             | -3.964117                 | 0.686367  | -0.941302 | H      | -4.289129                 | -3.380374 | -1.764397 |
| C                                                                             | -2.822112                 | -0.361633 | -0.810522 | H      | -3.251724                 | -2.306479 | -2.716132 |
| C                                                                             | 0.064232                  | 2.363462  | -2.115101 | H      | -4.858314                 | -1.753646 | -2.18883  |
| C                                                                             | -3.344166                 | -1.827585 | -0.601393 | H      | -4.604652                 | -3.01958  | 0.679285  |
| C                                                                             | -3.980256                 | -2.338972 | -1.89923  | H      | -3.879573                 | -1.636164 | 1.512383  |
| C                                                                             | -4.332521                 | -1.964825 | 0.570696  | H      | -5.252761                 | -1.39245  | 0.413028  |
| O                                                                             | -2.238637                 | -2.710232 | -0.372056 | H      | -1.832693                 | -2.385064 | 0.451456  |
| C                                                                             | -2.410794                 | 1.669107  | 2.381997  | H      | -2.860915                 | 0.812261  | 2.890712  |
| O                                                                             | -1.400856                 | -0.727583 | 1.321696  | H      | -1.367334                 | 1.728153  | 2.710625  |
| C                                                                             | 1.931737                  | -1.506337 | 1.399967  | H      | -2.918725                 | 2.578525  | 2.724322  |
| O                                                                             | 1.17941                   | -2.703988 | 1.58849   | H      | 1.603601                  | -0.72208  | 2.094291  |
| O                                                                             | 2.328725                  | -2.110603 | -0.89381  | H      | 2.97089                   | -1.751013 | 1.62754   |
| Br                                                                            | 4.676319                  | -0.354358 | -0.102752 | H      | 0.249735                  | -2.450115 | 1.706901  |
| H                                                                             | 1.889456                  | 1.364418  | 1.236044  | H      | 1.958458                  | -2.922402 | -0.501656 |
| H                                                                             | 3.473001                  | 1.853367  | 0.727953  |        |                           |           |           |
| H                                                                             | 2.541449                  | 2.703884  | -1.455432 |        |                           |           |           |
| H                                                                             | 2.168904                  | 3.599697  | 0.006988  |        |                           |           |           |
| H                                                                             | -0.358963                 | 4.241297  | 0.240407  |        |                           |           |           |
| H                                                                             | -0.051936                 | 2.842539  | 1.209824  |        |                           |           |           |
| H                                                                             | -2.27039                  | 2.818683  | -0.897705 |        |                           |           |           |

| 1 <i>R</i> ,7 <i>R</i> ,8 <i>S</i> ,10 <i>S</i> ,12 <i>R</i> -6 (conformer 3) |                           |           |           |        |                           |           |           |
|-------------------------------------------------------------------------------|---------------------------|-----------|-----------|--------|---------------------------|-----------|-----------|
| Atomic                                                                        | Standard Orientation (Å ) |           |           | Atomic | Standard Orientation (Å ) |           |           |
| Type                                                                          | X                         | Y         | Z         | Type   | X                         | Y         | Z         |
| C                                                                             | 2.509272                  | 1.511517  | 0.34596   | H      | -2.505227                 | 3.654088  | 0.607421  |
| C                                                                             | 1.951777                  | 2.665854  | -0.531684 | H      | 2.723873                  | 0.309612  | -1.471914 |
| C                                                                             | 0.471328                  | 2.657489  | -0.874907 | H      | 0.03721                   | 0.753284  | 1.018332  |
| C                                                                             | -0.455873                 | 3.144344  | 0.234748  | H      | -0.092349                 | -1.752875 | -0.710963 |
| C                                                                             | -1.964038                 | 2.814202  | 0.153088  | H      | 0.399523                  | -0.263814 | -1.477798 |
| C                                                                             | 2.75055                   | 0.167143  | -0.390336 | H      | -4.571016                 | 0.804175  | 1.143476  |
| C                                                                             | -2.542125                 | 1.538889  | 0.858234  | H      | -4.523872                 | 2.38206   | 0.356474  |
| C                                                                             | -1.928409                 | 0.216119  | 0.319136  | H      | -3.732181                 | 1.396814  | -1.742367 |
| C                                                                             | -0.482987                 | -0.008157 | 0.450009  | H      | -4.922402                 | 0.23084   | -1.205706 |
| C                                                                             | 0.377375                  | -0.785885 | -0.515851 | H      | -2.232944                 | -0.395482 | -1.733986 |
| C                                                                             | 1.848423                  | -1.050816 | -0.071677 | H      | -0.978945                 | 2.374021  | -2.416147 |
| C                                                                             | -4.02035                  | 1.410147  | 0.414486  | H      | 0.778008                  | 2.107362  | -2.894276 |
| C                                                                             | -3.964331                 | 0.68632   | -0.941031 | H      | -4.288958                 | -3.38047  | -1.764432 |
| C                                                                             | -2.822237                 | -0.361608 | -0.810416 | H      | -3.251868                 | -2.306274 | -2.716162 |
| C                                                                             | 0.064261                  | 2.363826  | -2.115221 | H      | -4.8585                   | -1.753807 | -2.188585 |
| C                                                                             | -3.344167                 | -1.827652 | -0.601337 | H      | -4.604497                 | -3.019825 | 0.679345  |
| C                                                                             | -3.98029                  | -2.338991 | -1.899168 | H      | -3.879467                 | -1.636419 | 1.512489  |
| C                                                                             | -4.332444                 | -1.965044 | 0.570803  | H      | -5.252739                 | -1.392732 | 0.41323   |
| O                                                                             | -2.238571                 | -2.710213 | -0.372166 | H      | -1.832538                 | -2.385034 | 0.451303  |
| C                                                                             | -2.410552                 | 1.669153  | 2.382029  | H      | -2.86078                  | 0.812401  | 2.890814  |
| O                                                                             | -1.400707                 | -0.727595 | 1.32163   | H      | -1.367054                 | 1.728012  | 2.710572  |
| C                                                                             | 1.931568                  | -1.506301 | 1.399828  | H      | -2.91829                  | 2.578661  | 2.724404  |
| O                                                                             | 1.179342                  | -2.704054 | 1.588136  | H      | 1.60318                   | -0.722099 | 2.094077  |
| O                                                                             | 2.328723                  | -2.110566 | -0.893902 | H      | 2.970728                  | -1.750797 | 1.627585  |
| Br                                                                            | 4.676296                  | -0.354477 | -0.102566 | H      | 0.24967                   | -2.450302 | 1.706821  |
| H                                                                             | 1.889523                  | 1.364447  | 1.235986  | H      | 1.958479                  | -2.922361 | -0.501712 |
| H                                                                             | 3.473042                  | 1.853403  | 0.727827  |        |                           |           |           |
| H                                                                             | 2.541465                  | 2.70395   | -1.455488 |        |                           |           |           |
| H                                                                             | 2.168981                  | 3.599699  | 0.006977  |        |                           |           |           |
| H                                                                             | -0.35898                  | 4.241314  | 0.240484  |        |                           |           |           |
| H                                                                             | -0.051924                 | 2.84247   | 1.20977   |        |                           |           |           |
| H                                                                             | -2.27034                  | 2.818496  | -0.897773 |        |                           |           |           |

| 1 <i>R</i> ,7 <i>R</i> ,8 <i>S</i> ,10 <i>S</i> ,12 <i>R</i> -6 (conformer 4) |                           |           |           |        |                           |           |           |
|-------------------------------------------------------------------------------|---------------------------|-----------|-----------|--------|---------------------------|-----------|-----------|
| Atomic                                                                        | Standard Orientation (Å ) |           |           | Atomic | Standard Orientation (Å ) |           |           |
| Type                                                                          | X                         | Y         | Z         | Type   | X                         | Y         | Z         |
| C                                                                             | 2.380173                  | 1.296101  | -0.125001 | H      | -2.269689                 | 3.586901  | -0.080662 |
| C                                                                             | 1.400913                  | 2.068097  | -1.051601 | H      | 2.71992                   | -0.189747 | -1.682571 |
| C                                                                             | 0.844099                  | 3.330797  | -0.418464 | H      | 0.093049                  | 0.57701   | 0.938905  |
| C                                                                             | -0.267853                 | 3.161944  | 0.602192  | H      | -0.203235                 | -2.039316 | -0.559001 |
| C                                                                             | -1.625398                 | 2.70181   | -0.019316 | H      | 0.265713                  | -0.687301 | -1.541953 |
| C                                                                             | 2.68906                   | -0.141346 | -0.591923 | H      | -4.564825                 | 1.090127  | 0.813786  |
| C                                                                             | -2.448554                 | 1.576244  | 0.696525  | H      | -4.264171                 | 2.592891  | -0.05533  |
| C                                                                             | -1.924631                 | 0.171615  | 0.260967  | H      | -3.398694                 | 1.377964  | -2.000655 |
| C                                                                             | -0.498183                 | -0.159459 | 0.409853  | H      | -4.773765                 | 0.401987  | -1.520078 |
| C                                                                             | 0.291785                  | -1.065954 | -0.513167 | H      | -2.176008                 | -0.597636 | -1.7492   |
| C                                                                             | 1.781636                  | -1.304154 | -0.115383 | H      | 0.930826                  | 5.446879  | -0.289015 |
| C                                                                             | -3.883115                 | 1.578875  | 0.10824   | H      | 2.100125                  | 4.665097  | -1.488559 |
| C                                                                             | -3.795004                 | 0.758969  | -1.187492 | H      | -4.566408                 | -3.315309 | -1.655767 |
| C                                                                             | -2.811199                 | -0.402155 | -0.877552 | H      | -3.393691                 | -2.430852 | -2.644037 |
| C                                                                             | 1.313651                  | 4.538478  | -0.74814  | H      | -4.952621                 | -1.680711 | -2.228809 |
| C                                                                             | -3.509261                 | -1.775376 | -0.577494 | H      | -4.946011                 | -2.706316 | 0.734003  |
| C                                                                             | -4.148832                 | -2.323992 | -1.858202 | H      | -4.10287                  | -1.343113 | 1.484942  |
| C                                                                             | -4.551469                 | -1.70159  | 0.551775  | H      | -5.393169                 | -1.04723  | 0.300631  |
| O                                                                             | -2.517146                 | -2.749557 | -0.227601 | H      | -2.098747                 | -2.401702 | 0.580479  |
| C                                                                             | -2.471265                 | 1.764412  | 2.218505  | H      | -1.480596                 | 1.666353  | 2.672345  |
| O                                                                             | -1.475339                 | -0.748743 | 1.312185  | H      | -2.859236                 | 2.75909   | 2.469379  |
| C                                                                             | 1.903592                  | -1.621262 | 1.391794  | H      | -3.116769                 | 1.018924  | 2.692962  |
| O                                                                             | 1.124242                  | -2.772256 | 1.714515  | H      | 1.627001                  | -0.764706 | 2.019904  |
| O                                                                             | 2.224165                  | -2.444613 | -0.84534  | H      | 2.940337                  | -1.880173 | 1.608808  |
| Br                                                                            | 4.597503                  | -0.550184 | -0.107713 | H      | 0.202525                  | -2.487923 | 1.825375  |
| H                                                                             | 2.027779                  | 1.287198  | 0.912063  | H      | 1.866139                  | -3.212061 | -0.363116 |
| H                                                                             | 3.316409                  | 1.858243  | -0.104422 |        |                           |           |           |
| H                                                                             | 0.569742                  | 1.424025  | -1.355622 |        |                           |           |           |
| H                                                                             | 1.937038                  | 2.321827  | -1.973593 |        |                           |           |           |
| H                                                                             | -0.418206                 | 4.113469  | 1.123018  |        |                           |           |           |
| H                                                                             | 0.060622                  | 2.463369  | 1.379079  |        |                           |           |           |
| H                                                                             | -1.459367                 | 2.398195  | -1.060093 |        |                           |           |           |

| 1 <i>R</i> ,7 <i>R</i> ,8 <i>S</i> ,10 <i>S</i> ,12 <i>R</i> -6 (conformer 5) |                           |           |           |        |                           |           |           |
|-------------------------------------------------------------------------------|---------------------------|-----------|-----------|--------|---------------------------|-----------|-----------|
| Atomic                                                                        | Standard Orientation (Å ) |           |           | Atomic | Standard Orientation (Å ) |           |           |
| Type                                                                          | X                         | Y         | Z         | Type   | X                         | Y         | Z         |
| C                                                                             | 1.898832                  | 1.250355  | 0.845136  | H      | -0.611983                 | 2.050086  | 2.060167  |
| C                                                                             | 1.632729                  | 2.625016  | 0.198208  | H      | 1.446372                  | 0.237511  | -1.030529 |
| C                                                                             | 0.316029                  | 2.73604   | -0.55121  | H      | -0.248315                 | -0.318295 | 2.147126  |
| C                                                                             | -0.9036                   | 3.201721  | 0.227234  | H      | 0.323434                  | -2.64992  | 0.985533  |
| C                                                                             | -1.445588                 | 2.370632  | 1.424453  | H      | 0.029881                  | -1.849469 | -0.52604  |
| C                                                                             | 2.09266                   | 0.112799  | -0.161143 | H      | -4.471512                 | 0.986568  | 0.50609   |
| C                                                                             | -2.43456                  | 1.171411  | 1.233581  | H      | -3.801485                 | 2.589416  | 0.230376  |
| C                                                                             | -1.808142                 | -0.118428 | 0.613165  | H      | -2.44434                  | 1.785458  | -1.62706  |
| C                                                                             | -0.615249                 | -0.767519 | 1.221749  | H      | -3.902145                 | 0.840782  | -1.828612 |
| C                                                                             | 0.373112                  | -1.66634  | 0.493699  | H      | -1.323348                 | -0.230702 | -1.498235 |
| C                                                                             | 1.892316                  | -1.311749 | 0.401368  | H      | -0.635239                 | 2.667967  | -2.454522 |
| C                                                                             | -3.556288                 | 1.520825  | 0.225031  | H      | 1.178173                  | 2.319709  | -2.444511 |
| C                                                                             | -3.068348                 | 1.029044  | -1.14685  | H      | -3.573817                 | -2.609248 | -3.06651  |
| C                                                                             | -2.226685                 | -0.248541 | -0.878297 | H      | -2.112011                 | -1.629308 | -3.25968  |
| C                                                                             | 0.280209                  | 2.557829  | -1.878954 | H      | -3.708257                 | -0.845528 | -3.212986 |
| C                                                                             | -2.980141                 | -1.571259 | -1.27083  | H      | -4.804627                 | -2.661183 | -0.90242  |
| C                                                                             | -3.104315                 | -1.657758 | -2.797345 | H      | -4.291203                 | -1.680619 | 0.478951  |
| C                                                                             | -4.366756                 | -1.700267 | -0.613334 | H      | -5.055444                 | -0.90787  | -0.925334 |
| O                                                                             | -2.193386                 | -2.712746 | -0.915852 | H      | -2.115351                 | -2.673544 | 0.05503   |
| C                                                                             | -3.025589                 | 0.873099  | 2.62585   | H      | -2.246428                 | 0.6368    | 3.360117  |
| O                                                                             | -1.926617                 | -1.330399 | 1.424531  | H      | -3.574367                 | 1.748373  | 2.992464  |
| C                                                                             | 2.641256                  | -1.506329 | 1.740485  | H      | -3.713892                 | 0.025117  | 2.592992  |
| O                                                                             | 2.763219                  | -2.895864 | 2.053615  | H      | 2.166357                  | -0.958046 | 2.564246  |
| O                                                                             | 2.433969                  | -2.238099 | -0.528777 | H      | 3.664539                  | -1.141134 | 1.621143  |
| Br                                                                            | 3.925825                  | 0.321554  | -0.941473 | H      | 1.921023                  | -3.202282 | 2.424005  |
| H                                                                             | 1.068049                  | 1.005318  | 1.508461  | H      | 2.69747                   | -3.011267 | 0.00462   |
| H                                                                             | 2.789242                  | 1.324826  | 1.478527  |        |                           |           |           |
| H                                                                             | 2.463383                  | 2.843143  | -0.481299 |        |                           |           |           |
| H                                                                             | 1.664611                  | 3.383054  | 0.99217   |        |                           |           |           |
| H                                                                             | -1.719703                 | 3.417509  | -0.469426 |        |                           |           |           |
| H                                                                             | -0.627864                 | 4.17689   | 0.657553  |        |                           |           |           |
| H                                                                             | -2.00386                  | 3.088865  | 2.039042  |        |                           |           |           |

| 1 <i>R</i> ,7 <i>R</i> ,8 <i>S</i> ,10 <i>S</i> ,12 <i>R</i> -6 (conformer 6) |                           |           |           |             |                           |           |           |
|-------------------------------------------------------------------------------|---------------------------|-----------|-----------|-------------|---------------------------|-----------|-----------|
| Atomic Type                                                                   | Standard Orientation (Å ) |           |           | Atomic Type | Standard Orientation (Å ) |           |           |
|                                                                               | X                         | Y         | Z         |             | X                         | Y         | Z         |
| C                                                                             | 2.56698                   | 1.460846  | 0.42954   | H           | -2.448596                 | 3.63884   | 0.714879  |
| C                                                                             | 2.036594                  | 2.682825  | -0.373956 | H           | 2.877127                  | 0.383412  | -1.45169  |
| C                                                                             | 0.565575                  | 2.740111  | -0.755544 | H           | 0.080477                  | 0.802713  | 0.826778  |
| C                                                                             | -0.392542                 | 3.151733  | 0.360724  | H           | -0.047599                 | -1.643181 | -0.999929 |
| C                                                                             | -1.899857                 | 2.833339  | 0.210416  | H           | 0.507907                  | -0.107973 | -1.6357   |
| C                                                                             | 2.817121                  | 0.162466  | -0.384474 | H           | -4.575314                 | 0.801053  | 0.920673  |
| C                                                                             | -2.519695                 | 1.512537  | 0.789246  | H           | -4.451127                 | 2.420054  | 0.204919  |
| C                                                                             | -1.891685                 | 0.208904  | 0.202641  | H           | -3.412032                 | 1.455839  | -1.838713 |
| C                                                                             | -0.435899                 | 0.031705  | 0.272376  | H           | -4.790151                 | 0.42422   | -1.520976 |
| C                                                                             | 0.427505                  | -0.701105 | -0.719311 | H           | -2.271685                 | -0.605736 | -1.793792 |
| C                                                                             | 1.862895                  | -1.04686  | -0.220536 | H           | -0.838328                 | 2.640437  | -2.361202 |
| C                                                                             | -3.974903                 | 1.434275  | 0.259628  | H           | 0.926695                  | 2.36908   | -2.806713 |
| C                                                                             | -3.836008                 | 0.754728  | -1.10878  | H           | -3.031568                 | -3.875971 | -0.326469 |
| C                                                                             | -2.830944                 | -0.401576 | -0.872672 | H           | -1.61147                  | -2.848537 | -0.098148 |
| C                                                                             | 0.193415                  | 2.572479  | -2.02998  | H           | -2.291443                 | -3.064516 | -1.719585 |
| C                                                                             | -3.496455                 | -1.765179 | -0.429772 | H           | -5.126276                 | -3.068045 | -0.984289 |
| C                                                                             | -2.542387                 | -2.954069 | -0.657725 | H           | -5.592785                 | -1.37056  | -0.895006 |
| C                                                                             | -4.792469                 | -2.048651 | -1.201358 | H           | -4.644136                 | -1.956834 | -2.28303  |
| O                                                                             | -3.895014                 | -1.719134 | 0.947781  | H           | -3.07606                  | -1.68625  | 1.469383  |
| C                                                                             | -2.467025                 | 1.531803  | 2.323401  | H           | -2.959934                 | 0.649578  | 2.741096  |
| O                                                                             | -1.291017                 | -0.72449  | 1.165802  | H           | -1.441453                 | 1.547373  | 2.708757  |
| C                                                                             | 1.832062                  | -1.618378 | 1.212715  | H           | -2.982012                 | 2.422026  | 2.703519  |
| O                                                                             | 0.971821                  | -2.754797 | 1.271103  | H           | 1.532586                  | -0.861426 | 1.948516  |
| O                                                                             | 2.359734                  | -2.055478 | -1.097567 | H           | 2.834959                  | -1.964981 | 1.468905  |
| Br                                                                            | 4.697927                  | -0.450034 | 0.007173  | H           | 0.064016                  | -2.420978 | 1.375743  |
| H                                                                             | 1.939306                  | 1.259832  | 1.30337   | H           | 1.956066                  | -2.884747 | -0.783574 |
| H                                                                             | 3.529238                  | 1.77078   | 0.841324  |             |                           |           |           |
| H                                                                             | 2.648759                  | 2.780336  | -1.278721 |             |                           |           |           |
| H                                                                             | 2.258057                  | 3.569144  | 0.238429  |             |                           |           |           |
| H                                                                             | -0.296179                 | 4.245594  | 0.443716  |             |                           |           |           |
| H                                                                             | -0.018455                 | 2.783497  | 1.325153  |             |                           |           |           |
| H                                                                             | -2.1739                   | 2.926718  | -0.845084 |             |                           |           |           |

| 1 <i>R</i> ,7 <i>R</i> ,8 <i>S</i> ,10 <i>S</i> ,12 <i>R</i> -6 (conformer 7) |                           |           |           |        |                           |           |           |
|-------------------------------------------------------------------------------|---------------------------|-----------|-----------|--------|---------------------------|-----------|-----------|
| Atomic                                                                        | Standard Orientation (Å ) |           |           | Atomic | Standard Orientation (Å ) |           |           |
| Type                                                                          | X                         | Y         | Z         | Type   | X                         | Y         | Z         |
| C                                                                             | 2.475368                  | 1.265338  | -0.046793 | H      | -2.149141                 | 3.606357  | -0.11043  |
| C                                                                             | 1.562121                  | 2.136691  | -0.955826 | H      | 2.875103                  | -0.121037 | -1.683017 |
| C                                                                             | 0.969068                  | 3.340639  | -0.24078  | H      | 0.140278                  | 0.650469  | 0.654407  |
| C                                                                             | -0.211905                 | 3.107171  | 0.689374  | H      | -0.154853                 | -1.976814 | -0.848815 |
| C                                                                             | -1.528216                 | 2.704767  | -0.05248  | H      | 0.394143                  | -0.586009 | -1.752442 |
| C                                                                             | 2.769536                  | -0.147386 | -0.596149 | H      | -4.568026                 | 1.164089  | 0.450504  |
| C                                                                             | -2.428314                 | 1.562689  | 0.533197  | H      | -4.114524                 | 2.637333  | -0.421724 |
| C                                                                             | -1.888542                 | 0.15246   | 0.107057  | H      | -3.009498                 | 1.277737  | -2.184525 |
| C                                                                             | -0.445695                 | -0.121494 | 0.17993   | H      | -4.557631                 | 0.491874  | -1.935585 |
| C                                                                             | 0.349918                  | -1.013484 | -0.74348  | H      | -2.254348                 | -0.923656 | -1.761471 |
| C                                                                             | 1.802592                  | -1.312341 | -0.259797 | H      | 1.066469                  | 5.435549  | 0.083409  |
| C                                                                             | -3.80302                  | 1.612739  | -0.191287 | H      | 2.305226                  | 4.74655   | -1.102899 |
| C                                                                             | -3.6177                   | 0.745139  | -1.441749 | H      | -3.552666                 | -3.774011 | 0.081808  |
| C                                                                             | -2.833506                 | -0.489148 | -0.937992 | H      | -1.999402                 | -2.927199 | 0.169607  |
| C                                                                             | 1.470555                  | 4.565955  | -0.429419 | H      | -2.721348                 | -3.287339 | -1.408948 |
| C                                                                             | -3.712847                 | -1.654325 | -0.334908 | H      | -5.542598                 | -2.731451 | -0.716354 |
| C                                                                             | -2.943292                 | -2.988667 | -0.377483 | H      | -5.705829                 | -0.986203 | -0.918934 |
| C                                                                             | -5.036627                 | -1.834278 | -1.086359 | H      | -4.873419                 | -1.948723 | -2.163628 |
| O                                                                             | -4.097726                 | -1.364488 | 1.018323  | H      | -3.287848                 | -1.407081 | 1.553045  |
| C                                                                             | -2.596775                 | 1.693698  | 2.052412  | H      | -1.65394                  | 1.566289  | 2.592916  |
| O                                                                             | -1.34473                  | -0.723397 | 1.145129  | H      | -3.000833                 | 2.682049  | 2.303148  |
| C                                                                             | 1.79486                   | -1.71179  | 1.233346  | H      | -3.295722                 | 0.938846  | 2.424422  |
| O                                                                             | 0.909819                  | -2.810766 | 1.442319  | H      | 1.536103                  | -0.865978 | 1.882638  |
| O                                                                             | 2.268384                  | -2.423601 | -1.021143 | H      | 2.793746                  | -2.055347 | 1.505281  |
| Br                                                                            | 4.625359                  | -0.654284 | -0.009843 | H      | 0.011173                  | -2.448649 | 1.527793  |
| H                                                                             | 2.078005                  | 1.195156  | 0.971482  | H      | 1.869317                  | -3.207039 | -0.601645 |
| H                                                                             | 3.425588                  | 1.794175  | 0.054765  |        |                           |           |           |
| H                                                                             | 0.75248                   | 1.536883  | -1.383549 |        |                           |           |           |
| H                                                                             | 2.161524                  | 2.476722  | -1.808248 |        |                           |           |           |
| H                                                                             | -0.392115                 | 4.024305  | 1.260032  |        |                           |           |           |
| H                                                                             | 0.05807                   | 2.359219  | 1.443673  |        |                           |           |           |
| H                                                                             | -1.292504                 | 2.454647  | -1.094143 |        |                           |           |           |

| 1 <i>R</i> ,7 <i>R</i> ,8 <i>S</i> ,10 <i>S</i> ,12 <i>R</i> -6 (conformer 8) |                           |           |           |                |                           |           |           |
|-------------------------------------------------------------------------------|---------------------------|-----------|-----------|----------------|---------------------------|-----------|-----------|
| Atomic<br>Type                                                                | Standard Orientation (Å ) |           |           | Atomic<br>Type | Standard Orientation (Å ) |           |           |
|                                                                               | X                         | Y         | Z         |                | X                         | Y         | Z         |
| C                                                                             | 2.166223                  | 0.653562  | 1.118642  | H              | -1.736007                 | 3.854785  | -0.425067 |
| C                                                                             | 2.378326                  | 2.180235  | 0.974883  | H              | 2.319392                  | 0.507921  | -1.062077 |
| C                                                                             | 1.335693                  | 2.895588  | 0.129818  | H              | 0.139239                  | 0.921099  | -0.338989 |
| C                                                                             | -0.0838                   | 2.970115  | 0.699297  | H              | -0.43272                  | -2.025576 | -0.957504 |
| C                                                                             | -1.245007                 | 2.877007  | -0.340801 | H              | 0.32164                   | -0.866962 | -2.054301 |
| C                                                                             | 2.417435                  | -0.134295 | -0.184037 | H              | -4.097244                 | 2.741594  | -1.105592 |
| C                                                                             | -2.367733                 | 1.837436  | -0.070666 | H              | -2.905052                 | 1.996132  | -2.173546 |
| C                                                                             | -1.923424                 | 0.348392  | -0.165654 | H              | -4.633537                 | 0.290284  | -2.107676 |
| C                                                                             | -0.491115                 | 0.04397   | -0.331495 | H              | -4.938667                 | 0.563306  | -0.399916 |
| C                                                                             | 0.182737                  | -1.121724 | -0.996074 | H              | -2.663029                 | -0.941302 | -1.704963 |
| C                                                                             | 1.616091                  | -1.450076 | -0.459385 | H              | 0.957758                  | 3.990007  | -1.659248 |
| C                                                                             | -3.418856                 | 1.887108  | -1.2086   | H              | 2.695046                  | 3.422213  | -1.40817  |
| C                                                                             | -4.148778                 | 0.534189  | -1.157589 | H              | -4.853551                 | -3.439624 | -0.236837 |
| C                                                                             | -3.061508                 | -0.506926 | -0.779386 | H              | -4.108495                 | -2.849267 | -1.731639 |
| C                                                                             | 1.673493                  | 3.457557  | -1.038029 | H              | -5.465511                 | -1.957859 | -1.003102 |
| C                                                                             | -3.563373                 | -1.730712 | 0.048988  | H              | -4.449559                 | -2.287312 | 1.931917  |
| C                                                                             | -4.563055                 | -2.537934 | -0.785097 | H              | -3.463028                 | -0.820187 | 2.036204  |
| C                                                                             | -4.17783                  | -1.364087 | 1.410263  | H              | -5.082642                 | -0.754789 | 1.313479  |
| O                                                                             | -2.461346                 | -2.624725 | 0.274321  | H              | -1.853904                 | -2.139591 | 0.857483  |
| C                                                                             | -3.035008                 | 2.120701  | 1.290515  | H              | -2.34428                  | 1.941262  | 2.11936   |
| O                                                                             | -1.135912                 | -0.163426 | 0.95865   | H              | -3.3586                   | 3.167534  | 1.334757  |
| C                                                                             | 1.589143                  | -2.425309 | 0.74152   | H              | -3.915423                 | 1.494466  | 1.458983  |
| O                                                                             | 1.005349                  | -1.939968 | 1.939417  | H              | 2.622056                  | -2.681715 | 1.000522  |
| O                                                                             | 2.183915                  | -2.158322 | -1.559312 | H              | 1.095639                  | -3.343005 | 0.38819   |
| Br                                                                            | 4.398434                  | -0.557089 | -0.230203 | H              | 0.118231                  | -1.594433 | 1.74576   |
| H                                                                             | 1.16248                   | 0.453467  | 1.492101  | H              | 3.132415                  | -2.277918 | -1.371334 |
| H                                                                             | 2.827531                  | 0.268831  | 1.898211  |                |                           |           |           |
| H                                                                             | 3.377575                  | 2.366745  | 0.563836  |                |                           |           |           |
| H                                                                             | 2.369861                  | 2.606     | 1.988664  |                |                           |           |           |
| H                                                                             | -0.170517                 | 3.913034  | 1.256774  |                |                           |           |           |
| H                                                                             | -0.19955                  | 2.188515  | 1.45638   |                |                           |           |           |
| H                                                                             | -0.826715                 | 2.673217  | -1.332851 |                |                           |           |           |

**Table S12** Experimental and calculated <sup>1</sup>H NMR data for compound **6**

| No. | <b>6</b> , exptl. $\delta_{\text{H}}$ <sup>a</sup> | 1 <i>R</i> ,7 <i>R</i> ,8 <i>S</i> ,10 <i>R</i> ,12 <i>R</i> - <b>6</b> ,<br>calcd. $\delta_{\text{H}}$ <sup>b</sup> | 1 <i>R</i> ,7 <i>R</i> ,8 <i>S</i> ,10,12 <i>R</i> - <b>6</b> ,<br>calcd. $\delta_{\text{H}}$ <sup>b</sup> |
|-----|----------------------------------------------------|----------------------------------------------------------------------------------------------------------------------|------------------------------------------------------------------------------------------------------------|
| 2   | 1.25                                               | 1.38                                                                                                                 | 1.28                                                                                                       |
|     | 1.96                                               | 2.04                                                                                                                 | 2.06                                                                                                       |
| 3   | 1.63                                               | 1.91                                                                                                                 | 1.82                                                                                                       |
|     | 2.11                                               | 2.10                                                                                                                 | 2.08                                                                                                       |
| 5   | 2.28                                               | 2.32                                                                                                                 | 2.26                                                                                                       |
|     | 2.42                                               | 2.65                                                                                                                 | 2.47                                                                                                       |
| 6   | 1.9                                                | 2.01                                                                                                                 | 2.05                                                                                                       |
|     | 2.11                                               | 2.59                                                                                                                 | 2.81                                                                                                       |
| 7   | 4.04                                               | 4.53                                                                                                                 | 4.61                                                                                                       |
| 9   | 2.25                                               | 1.94                                                                                                                 | 1.81                                                                                                       |
|     | 2.25                                               | 2.45                                                                                                                 | 2.47                                                                                                       |
| 10  | 2.89                                               | 2.53                                                                                                                 | 2.50                                                                                                       |
| 12  | 2.21                                               | 2.34                                                                                                                 | 2.35                                                                                                       |
| 13  | 1.63                                               | 1.74                                                                                                                 | 1.76                                                                                                       |
|     | 1.9                                                | 1.85                                                                                                                 | 1.82                                                                                                       |
| 14  | 1.76                                               | 1.51                                                                                                                 | 1.50                                                                                                       |
|     | 1.76                                               | 1.63                                                                                                                 | 1.62                                                                                                       |
| 15  | 0.86                                               | 1.13                                                                                                                 | 1.13                                                                                                       |
| 16  | 4.84                                               | 5.36                                                                                                                 | 5.34                                                                                                       |
|     | 5.03                                               | 5.54                                                                                                                 | 5.52                                                                                                       |
| 17  | 3.65                                               | 3.34                                                                                                                 | 3.61                                                                                                       |
|     | 3.87                                               | 4.11                                                                                                                 | 3.91                                                                                                       |
| 18  | 1.21                                               | 1.15                                                                                                                 | 1.17                                                                                                       |
| 19  | 1.27                                               | 1.38                                                                                                                 | 1.39                                                                                                       |

<sup>a</sup> Recorded in CDCl<sub>3</sub> at 600 MHz.<sup>b</sup> Calculated in CDCl<sub>3</sub>

**Table S13** Experimental and calculated  $^{13}\text{C}$  NMR data for compound **6**

| No. | <b>6</b> , exptl. $\delta_{\text{C}}$ <sup>a</sup> | 1 <i>R</i> ,7 <i>R</i> ,8 <i>S</i> ,10 <i>R</i> ,12 <i>R</i> - <b>6</b> ,<br>calcd. $\delta_{\text{H}}$ <sup>b</sup> | 1 <i>R</i> ,7 <i>R</i> ,8 <i>S</i> ,10,12 <i>R</i> - <b>6</b> ,<br>calcd. $\delta_{\text{H}}$ <sup>b</sup> |
|-----|----------------------------------------------------|----------------------------------------------------------------------------------------------------------------------|------------------------------------------------------------------------------------------------------------|
| 1   | 44.6                                               | 44.50                                                                                                                | 44.03                                                                                                      |
| 2   | 42.4                                               | 37.97                                                                                                                | 38.00                                                                                                      |
| 3   | 25.1                                               | 21.86                                                                                                                | 21.45                                                                                                      |
| 4   | 147.4                                              | 156.41                                                                                                               | 155.29                                                                                                     |
| 5   | 35.4                                               | 33.49                                                                                                                | 34.34                                                                                                      |
| 6   | 29.7                                               | 30.38                                                                                                                | 30.53                                                                                                      |
| 7   | 63                                                 | 76.01                                                                                                                | 76.58                                                                                                      |
| 8   | 75                                                 | 77.02                                                                                                                | 72.27                                                                                                      |
| 9   | 33.3                                               | 33.62                                                                                                                | 33.82                                                                                                      |
| 10  | 54.7                                               | 59.19                                                                                                                | 58.19                                                                                                      |
| 11  | 76.2                                               | 77.82                                                                                                                | 80.65                                                                                                      |
| 12  | 50.2                                               | 46.50                                                                                                                | 45.38                                                                                                      |
| 13  | 27.7                                               | 23.61                                                                                                                | 23.33                                                                                                      |
| 14  | 38.8                                               | 35.42                                                                                                                | 34.95                                                                                                      |
| 15  | 24.1                                               | 14.73                                                                                                                | 14.50                                                                                                      |
| 16  | 113.8                                              | 114.99                                                                                                               | 113.97                                                                                                     |
| 17  | 67                                                 | 67.08                                                                                                                | 62.42                                                                                                      |
| 18  | 75.4                                               | 71.35                                                                                                                | 72.18                                                                                                      |
| 19  | 29.6                                               | 24.40                                                                                                                | 24.15                                                                                                      |
| 20  | 26                                                 | 21.53                                                                                                                | 21.38                                                                                                      |

<sup>a</sup> Recorded in  $\text{CDCl}_3$  at 600 MHz.<sup>b</sup> Calculated in  $\text{CDCl}_3$

**Table S 14** DP4+ analyses of calculated and experimental NMR chemical shifts of **6** (unscaled). Isomer 1: 1*R*,7*R*,8*S*,10*R*,12*R*-**6**; Isomer 2: 1*R*,7*R*,8*S*,10*S*,12*R*-**6**

| Functional       | Solvent? |          | Basis Set   |          | Type of Data    |          |
|------------------|----------|----------|-------------|----------|-----------------|----------|
| mPW1PW91         | PCM      |          | 6-311G(d,p) |          | Unscaled Shifts |          |
|                  | Isomer 1 | Isomer 2 | Isomer 3    | Isomer 4 | Isomer 5        | Isomer 6 |
| sDP4+ (H data)   | 84.50%   | 15.50%   | -           | -        | -               | -        |
| sDP4+ (C data)   | 99.99%   | 0.01%    | -           | -        | -               | -        |
| sDP4+ (all data) | 100.00%  | 0.00%    | -           | -        | -               | -        |
| uDP4+ (H data)   | 0.80%    | 99.20%   | -           | -        | -               | -        |
| uDP4+ (C data)   | 99.95%   | 0.05%    | -           | -        | -               | -        |
| uDP4+ (all data) | 94.52%   | 5.48%    | -           | -        | -               | -        |
| DP4+ (H data)    | 4.23%    | 95.77%   | -           | -        | -               | -        |
| DP4+ (C data)    | 100.00%  | 0.00%    | -           | -        | -               | -        |
| DP4+ (all data)  | 100.00%  | 0.00%    | -           | -        | -               | -        |

| Functional<br>mPW1PW91 |      | Solvent?<br>PCM |            | Basis Set<br>6-311G(d,p) |          | Type of Data<br>Unscaled Shifts |          |
|------------------------|------|-----------------|------------|--------------------------|----------|---------------------------------|----------|
|                        |      | DP4+            | 100.00%    | 0.00%                    | -        | -                               | -        |
| Nuclei                 | sp2? | Experimental    | Isomer 1   | Isomer 2                 | Isomer 3 | Isomer 4                        | Isomer 5 |
| C                      |      | 44.6            | 44.4954    | 44.0338                  |          |                                 |          |
| C                      |      | 42.4            | 37.9731    | 38.0005                  |          |                                 |          |
| C                      |      | 25.1            | 21.8622    | 21.4497                  |          |                                 |          |
| C                      | x    | 147.4           | 156.4149   | 155.2911                 |          |                                 |          |
| C                      |      | 35.4            | 33.4935    | 34.344                   |          |                                 |          |
| C                      |      | 29.7            | 30.3811    | 30.5338                  |          |                                 |          |
| C                      |      | 63              | 76.0138    | 76.5803                  |          |                                 |          |
| C                      |      | 75              | 77.0199    | 72.2694                  |          |                                 |          |
| C                      |      | 33.3            | 33.6197    | 33.8159                  |          |                                 |          |
| C                      |      | 54.7            | 59.1888    | 58.1856                  |          |                                 |          |
| C                      |      | 76.2            | 77.8232    | 80.6474                  |          |                                 |          |
| C                      |      | 50.2            | 46.5004    | 45.3765                  |          |                                 |          |
| C                      |      | 27.7            | 23.614     | 23.3259                  |          |                                 |          |
| C                      |      | 38.8            | 35.418     | 34.9465                  |          |                                 |          |
| C                      |      | 24.1            | 14.7326    | 14.499                   |          |                                 |          |
| C                      | x    | 113.8           | 114.992    | 113.9682                 |          |                                 |          |
| C                      |      | 67              | 67.0767    | 62.417                   |          |                                 |          |
| C                      |      | 75.4            | 71.3471    | 72.1775                  |          |                                 |          |
| C                      |      | 29.6            | 24.3962    | 24.1539                  |          |                                 |          |
| C                      |      | 26              | 21.5274    | 21.3832                  |          |                                 |          |
| H                      |      | 1.25            | 1.3819     | 1.2792                   |          |                                 |          |
| H                      |      | 1.96            | 2.0432     | 2.0601                   |          |                                 |          |
| H                      |      | 1.63            | 1.9091     | 1.8248                   |          |                                 |          |
| H                      |      | 2.11            | 2.1012     | 2.0765                   |          |                                 |          |
| H                      |      | 2.28            | 2.3217     | 2.2561                   |          |                                 |          |
| H                      |      | 2.42            | 2.6501     | 2.4668                   |          |                                 |          |
| H                      |      | 1.9             | 2.0126     | 2.0459                   |          |                                 |          |
| H                      |      | 2.11            | 2.5913     | 2.8141                   |          |                                 |          |
| H                      |      | 4.04            | 4.5341     | 4.6118                   |          |                                 |          |
| H                      |      | 2.25            | 1.9405     | 1.806                    |          |                                 |          |
| H                      |      | 2.25            | 2.4485     | 2.4734                   |          |                                 |          |
| H                      |      | 2.89            | 2.5307     | 2.4959                   |          |                                 |          |
| H                      |      | 2.21            | 2.339      | 2.3474                   |          |                                 |          |
| H                      |      | 1.63            | 1.7374     | 1.7576                   |          |                                 |          |
| H                      |      | 1.9             | 1.847      | 1.8244                   |          |                                 |          |
| H                      |      | 1.76            | 1.5056     | 1.5045                   |          |                                 |          |
| H                      |      | 1.76            | 1.6255     | 1.6152                   |          |                                 |          |
| H                      | x    | 0.86            | 1.13126601 | 1.129                    |          |                                 |          |
| H                      | x    | 4.84            | 5.3612     | 5.3401                   |          |                                 |          |
| H                      |      | 5.03            | 5.5369     | 5.5154                   |          |                                 |          |
| H                      |      | 3.65            | 3.3435     | 3.608                    |          |                                 |          |
| H                      |      | 3.87            | 4.1124     | 3.9077                   |          |                                 |          |
| H                      |      | 1.21            | 1.14853272 | 1.16979934               |          |                                 |          |
| H                      |      | 1.27            | 1.37696631 | 1.39223302               |          |                                 |          |

**Table S15** Energy analyses of 1*R*,7*R*,8*S*,10*R*-**8** (four conformers)

| NO.                                                                         | 3D conformers<br>B3LYP/6-31G(d,p)                                                   | E (Hartree)  | $\Delta E$<br>(KJ/mol) | Boltzmann<br>distribution |
|-----------------------------------------------------------------------------|-------------------------------------------------------------------------------------|--------------|------------------------|---------------------------|
| 1 <i>R</i> ,7 <i>R</i> ,8 <i>S</i> ,10 <i>R</i> - <b>8</b><br>(conformer 1) | 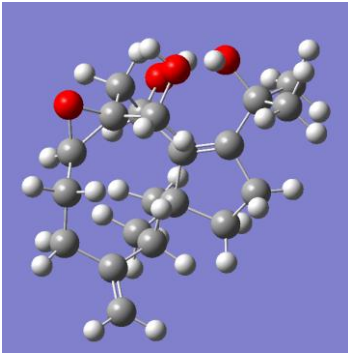   | -1081.750344 | 0                      | 96.27%                    |
| 1 <i>R</i> ,7 <i>R</i> ,8 <i>S</i> ,10 <i>R</i> - <b>8</b><br>(conformer 2) |   | -1081.744634 | 14.9915984             | 0.23%                     |
| 1 <i>R</i> ,7 <i>R</i> ,8 <i>S</i> ,10 <i>R</i> - <b>8</b><br>(conformer 3) |  | -1081.747207 | 8.236189876            | 3.47%                     |
| 1 <i>R</i> ,7 <i>R</i> ,8 <i>S</i> ,10 <i>R</i> - <b>8</b><br>(conformer 4) |  | -1081.742677 | 20.12969964            | 0.03%                     |

**Table S16** Cartesian coordinates of the low-energy re-optimized conformers of 1*R*,7*R*,8*S*,10*R*-**8** calculated at B3LYP/6-31G(d,p) level of theory

| 1 <i>R</i> ,7 <i>R</i> ,8 <i>S</i> ,10 <i>R</i> - <b>8</b> (conformer 1) |                           |           |           |        |                           |           |           |
|--------------------------------------------------------------------------|---------------------------|-----------|-----------|--------|---------------------------|-----------|-----------|
| Atomic                                                                   | Standard Orientation (Å ) |           |           | Atomic | Standard Orientation (Å ) |           |           |
| Type                                                                     | X                         | Y         | Z         | Type   | X                         | Y         | Z         |
| C                                                                        | 3.450372                  | 1.381008  | -0.146959 | H      | 2.41802                   | 1.379802  | 1.780163  |
| C                                                                        | 4.023386                  | -0.047126 | 0.045493  | H      | -0.197979                 | -0.088978 | 2.501219  |
| C                                                                        | 3.411057                  | -1.134861 | -0.818721 | H      | 0.148255                  | 2.145641  | 2.356366  |
| C                                                                        | 1.917152                  | -1.377861 | -0.742748 | H      | -1.069566                 | 2.408882  | 1.139014  |
| C                                                                        | 1.415684                  | -1.825124 | 0.642038  | H      | -1.385868                 | -3.682879 | 0.179699  |
| C                                                                        | 2.267729                  | 1.710303  | 0.746881  | H      | 0.037481                  | -3.528028 | -0.835285 |
| C                                                                        | -0.118617                 | -2.019818 | 0.790801  | H      | -1.034455                 | -1.824807 | -2.170189 |
| C                                                                        | -0.939176                 | -0.716773 | 0.627676  | H      | -2.501536                 | -2.538503 | -1.529623 |
| C                                                                        | -0.840922                 | 0.341665  | 1.729196  | H      | 3.772089                  | -2.649374 | -2.260955 |
| C                                                                        | -0.2424                   | 1.750671  | 1.412955  | H      | 5.255515                  | -1.693983 | -1.712143 |
| C                                                                        | 0.851472                  | 1.925197  | 0.368385  | H      | -3.868365                 | 1.013036  | -2.557632 |
| C                                                                        | -0.726226                 | -2.952437 | -0.301825 | H      | -2.108994                 | 0.859258  | -2.702856 |
| C                                                                        | -1.562002                 | -2.055717 | -1.232669 | H      | -3.140289                 | -0.572091 | -2.885868 |
| C                                                                        | -1.783765                 | -0.78494  | -0.42435  | H      | -5.09906                  | 0.140626  | -0.571087 |
| C                                                                        | 4.183295                  | -1.859631 | -1.636486 | H      | -4.21668                  | -0.614777 | 0.778649  |
| C                                                                        | -2.944705                 | 0.131501  | -0.813456 | H      | -4.418159                 | -1.492361 | -0.752043 |
| C                                                                        | -3.015087                 | 0.364584  | -2.334183 | H      | -2.216243                 | 1.966656  | -0.595436 |
| C                                                                        | -4.254395                 | -0.505214 | -0.309248 | H      | 0.127704                  | -2.098458 | 2.99171   |
| O                                                                        | -2.894049                 | 1.409534  | -0.157421 | H      | -1.436218                 | -2.689032 | 2.410288  |
| C                                                                        | -0.365601                 | -2.649773 | 2.183555  | H      | 0.028491                  | -3.67355  | 2.201921  |
| O                                                                        | -2.092076                 | 0.539672  | 2.3863    | H      | -2.64995                  | 0.973656  | 1.709195  |
| C                                                                        | 0.414156                  | 1.945005  | -1.086372 | H      | 1.256472                  | 2.215457  | -1.731432 |
| O                                                                        | 1.73997                   | 3.041777  | 0.671356  | H      | 0.029369                  | 0.972972  | -1.394495 |
| O                                                                        | -0.674374                 | 2.85399   | -1.301758 | H      | -0.394531                 | 3.729229  | -0.985322 |
| H                                                                        | 3.222742                  | 1.562004  | -1.202239 |        |                           |           |           |
| H                                                                        | 4.234179                  | 2.101334  | 0.122575  |        |                           |           |           |
| H                                                                        | 5.098403                  | -0.016409 | -0.161254 |        |                           |           |           |
| H                                                                        | 3.933288                  | -0.316583 | 1.108766  |        |                           |           |           |
| H                                                                        | 1.649578                  | -2.131826 | -1.491485 |        |                           |           |           |
| H                                                                        | 1.389135                  | -0.463317 | -1.030186 |        |                           |           |           |
| H                                                                        | 1.743928                  | -1.104307 | 1.402886  |        |                           |           |           |
| H                                                                        | 1.909019                  | -2.773037 | 0.899495  |        |                           |           |           |

| 1R,7R,8S,10R-8 (conformer 2) |                           |           |           |        |                           |           |           |
|------------------------------|---------------------------|-----------|-----------|--------|---------------------------|-----------|-----------|
| Atomic                       | Standard Orientation (Å ) |           |           | Atomic | Standard Orientation (Å ) |           |           |
| Type                         | X                         | Y         | Z         | Type   | X                         | Y         | Z         |
| C                            | -3.88103                  | -1.092555 | 0.07022   | H      | -2.676699                 | -1.256856 | 1.897441  |
| C                            | -4.253906                 | 0.409359  | 0.13219   | H      | -0.252134                 | 0.381767  | 2.096014  |
| C                            | -3.261834                 | 1.32315   | -0.564345 | H      | -0.348656                 | -2.029765 | 2.167433  |
| C                            | -2.055537                 | 1.714282  | 0.26816   | H      | 0.739214                  | -2.18553  | 0.791631  |
| C                            | -0.805442                 | 2.172428  | -0.498844 | H      | 2.364937                  | 3.303546  | 0.07083   |
| C                            | -2.627287                 | -1.487134 | 0.827521  | H      | 1.243391                  | 3.554338  | -1.269316 |
| C                            | 0.540941                  | 2.139684  | 0.289475  | H      | 1.883271                  | 1.414959  | -2.268639 |
| C                            | 1.111982                  | 0.704165  | 0.492858  | H      | 3.399349                  | 1.875064  | -1.514072 |
| C                            | 0.544994                  | -0.183896 | 1.608154  | H      | -2.759563                 | 2.370012  | -2.347521 |
| C                            | -0.053152                 | -1.567357 | 1.219263  | H      | -4.360047                 | 1.451734  | -2.370532 |
| C                            | -1.255953                 | -1.64392  | 0.284804  | H      | 3.725931                  | -2.229472 | -1.856977 |
| C                            | 1.644097                  | 2.799111  | -0.584212 | H      | 1.974781                  | -1.918465 | -1.811126 |
| C                            | 2.351381                  | 1.643977  | -1.298923 | H      | 3.07634                   | -0.780651 | -2.629907 |
| C                            | 2.16094                   | 0.478961  | -0.333797 | H      | 5.275899                  | -1.038784 | -0.264558 |
| C                            | -3.465752                 | 1.735371  | -1.820195 | H      | 4.716029                  | 0.39572   | 0.621277  |
| C                            | 3.143325                  | -0.681284 | -0.443878 | H      | 4.909996                  | 0.443586  | -1.146984 |
| C                            | 2.960373                  | -1.446077 | -1.768022 | H      | 3.501829                  | -2.354337 | 0.53221   |
| C                            | 4.596851                  | -0.177419 | -0.303526 | H      | -0.375485                 | 2.513713  | 2.271791  |
| O                            | 2.912205                  | -1.593244 | 0.652375  | H      | 1.350997                  | 2.864125  | 2.181331  |
| C                            | 0.411186                  | 2.906832  | 1.62087   | H      | 0.176473                  | 3.961076  | 1.423721  |
| O                            | 1.501092                  | -0.373273 | 2.652298  | H      | 2.237764                  | -0.856622 | 2.232785  |
| C                            | -0.970892                 | -1.544199 | -1.205812 | H      | -1.893771                 | -1.391648 | -1.777285 |
| O                            | -2.105688                 | -2.799027 | 0.567646  | H      | -0.301702                 | -0.706558 | -1.410885 |
| O                            | -0.289177                 | -2.713327 | -1.653579 | H      | -0.818519                 | -3.464567 | -1.335867 |
| H                            | -3.802737                 | -1.406304 | -0.974771 |        |                           |           |           |
| H                            | -4.707707                 | -1.67205  | 0.504698  |        |                           |           |           |
| H                            | -5.244181                 | 0.523605  | -0.323328 |        |                           |           |           |
| H                            | -4.358713                 | 0.709758  | 1.185317  |        |                           |           |           |
| H                            | -1.806787                 | 0.866643  | 0.908968  |        |                           |           |           |
| H                            | -2.370282                 | 2.505467  | 0.965568  |        |                           |           |           |
| H                            | -0.965042                 | 3.202258  | -0.845787 |        |                           |           |           |
| H                            | -0.693351                 | 1.564335  | -1.405143 |        |                           |           |           |

| 1R,7R,8S,10R-8 (conformer 3) |                           |           |           |        |                           |           |           |
|------------------------------|---------------------------|-----------|-----------|--------|---------------------------|-----------|-----------|
| Atomic                       | Standard Orientation (Å ) |           |           | Atomic | Standard Orientation (Å ) |           |           |
| Type                         | X                         | Y         | Z         | Type   | X                         | Y         | Z         |
| C                            | -3.490319                 | -1.571645 | -0.465854 | H      | -2.728224                 | -1.312479 | 1.587622  |
| C                            | -3.468733                 | -0.234556 | -1.248775 | H      | -0.099996                 | 0.577199  | 2.239713  |
| C                            | -3.583169                 | 1.025171  | -0.40957  | H      | -0.508253                 | -1.654419 | 2.467893  |
| C                            | -2.360237                 | 1.486774  | 0.362563  | H      | 0.824732                  | -2.15039  | 1.467266  |
| C                            | -1.201196                 | 1.974166  | -0.534891 | H      | 1.79261                   | 3.569206  | -0.268226 |
| C                            | -2.435047                 | -1.72199  | 0.618482  | H      | 0.605183                  | 3.501138  | -1.569221 |
| C                            | 0.185351                  | 2.164555  | 0.153865  | H      | 1.598506                  | 1.450419  | -2.434551 |
| C                            | 0.951003                  | 0.832988  | 0.421008  | H      | 3.024805                  | 2.151918  | -1.693458 |
| C                            | 0.615849                  | -0.0092   | 1.659805  | H      | -4.835304                 | 2.609925  | 0.242793  |
| C                            | -0.005347                 | -1.442489 | 1.518642  | H      | -5.609575                 | 1.401585  | -0.921967 |
| C                            | -0.974121                 | -1.816444 | 0.40367   | H      | 4.272604                  | -1.526396 | -1.84868  |
| C                            | 1.144451                  | 2.8912    | -0.836221 | H      | 2.586656                  | -1.304737 | -2.349338 |
| C                            | 2.009637                  | 1.799011  | -1.474858 | H      | 3.750082                  | 0.022613  | -2.53922  |
| C                            | 1.980836                  | 0.681237  | -0.44369  | H      | 5.184927                  | -0.41476  | 0.195909  |
| C                            | -4.730754                 | 1.711285  | -0.360729 | H      | 4.132665                  | 0.595076  | 1.219028  |
| C                            | 3.121154                  | -0.336457 | -0.461296 | H      | 4.6826                    | 1.198682  | -0.357519 |
| C                            | 3.448938                  | -0.806499 | -1.891921 | H      | 2.181674                  | -2.038991 | -0.131155 |
| C                            | 4.36106                   | 0.306669  | 0.188845  | H      | -0.656922                 | 2.601689  | 2.160726  |
| O                            | 2.84994                   | -1.496779 | 0.340742  | H      | 1.008572                  | 3.138369  | 1.925078  |
| C                            | 0.039183                  | 3.021899  | 1.42876   | H      | -0.330901                 | 4.021238  | 1.164933  |
| O                            | 1.743015                  | -0.133391 | 2.527645  | H      | 2.356418                  | -0.72015  | 2.040401  |
| C                            | -0.403956                 | -1.927746 | -0.997699 | H      | -1.172902                 | -2.266968 | -1.699464 |
| O                            | -1.772369                 | -2.990475 | 0.744406  | H      | -0.009379                 | -0.969408 | -1.337024 |
| O                            | 0.71153                   | -2.831362 | -1.031764 | H      | 0.397474                  | -3.683805 | -0.685251 |
| H                            | -3.376417                 | -2.39689  | -1.177536 |        |                           |           |           |
| H                            | -4.475659                 | -1.695999 | 0.000165  |        |                           |           |           |
| H                            | -2.548723                 | -0.19805  | -1.846571 |        |                           |           |           |
| H                            | -4.296789                 | -0.261622 | -1.966406 |        |                           |           |           |
| H                            | -2.00395                  | 0.675501  | 1.003798  |        |                           |           |           |
| H                            | -2.657751                 | 2.298349  | 1.035149  |        |                           |           |           |
| H                            | -1.504247                 | 2.936788  | -0.967993 |        |                           |           |           |
| H                            | -1.068947                 | 1.293861  | -1.385947 |        |                           |           |           |

| 1R,7R,8S,10R-8 (conformer 4) |                           |           |           |             |                           |           |           |
|------------------------------|---------------------------|-----------|-----------|-------------|---------------------------|-----------|-----------|
| Atomic Type                  | Standard Orientation (Å ) |           |           | Atomic Type | Standard Orientation (Å ) |           |           |
|                              | X                         | Y         | Z         |             | X                         | Y         | Z         |
| C                            | -3.514045                 | -1.117597 | -0.901018 | H           | -3.039236                 | -0.44992  | 1.12501   |
| C                            | -3.18269                  | 0.08072   | -1.831124 | H           | 1.034845                  | -0.208277 | 2.737555  |
| C                            | -2.893689                 | 1.394776  | -1.119948 | H           | -1.214446                 | -0.544068 | 2.378215  |
| C                            | -1.432363                 | 1.674506  | -0.780135 | H           | -0.467746                 | -2.113092 | 2.483692  |
| C                            | -1.137048                 | 1.928     | 0.710837  | H           | 1.988424                  | 3.31421   | 0.986894  |
| C                            | -2.716032                 | -1.188536 | 0.388563  | H           | 0.594453                  | 3.770927  | 0.008073  |
| C                            | 0.363079                  | 1.880684  | 1.13677   | H           | 1.23404                   | 2.190775  | -1.730011 |
| C                            | 1.082375                  | 0.540666  | 0.778802  | H           | 2.824422                  | 2.527508  | -1.076054 |
| C                            | 0.85969                   | -0.631432 | 1.741365  | H           | -3.678572                 | 3.204861  | -0.328488 |
| C                            | -0.56846                  | -1.237099 | 1.830744  | H           | -4.906767                 | 2.063879  | -1.102799 |
| C                            | -1.335313                 | -1.700927 | 0.580804  | H           | 3.337171                  | -0.824277 | -3.058749 |
| C                            | 1.196983                  | 2.917352  | 0.33944   | H           | 1.640908                  | -0.354134 | -2.843856 |
| C                            | 1.834904                  | 2.136786  | -0.812151 | H           | 2.902595                  | 0.892749  | -2.942134 |
| C                            | 1.895191                  | 0.700156  | -0.29663  | H           | 5.014962                  | -0.487795 | -1.212464 |
| C                            | -3.8712                   | 2.262021  | -0.835278 | H           | 4.48259                   | 0.01849   | 0.405045  |
| C                            | 2.871251                  | -0.218293 | -1.046144 | H           | 4.560423                  | 1.203346  | -0.912068 |
| C                            | 2.671942                  | -0.10776  | -2.56698  | H           | 2.714342                  | -1.672059 | 0.225892  |
| C                            | 4.32227                   | 0.162956  | -0.669055 | H           | -0.226851                 | 1.580531  | 3.249209  |
| O                            | 2.71422                   | -1.611389 | -0.758239 | H           | 1.444306                  | 2.139267  | 3.028282  |
| C                            | 0.421994                  | 2.221548  | 2.641307  | H           | 0.090302                  | 3.255182  | 2.798361  |
| O                            | 1.812006                  | -1.707699 | 1.660246  | H           | 1.331801                  | -2.45345  | 1.231636  |
| C                            | -0.565529                 | -2.220312 | -0.618843 | H           | -1.264527                 | -2.73265  | -1.288382 |
| O                            | -2.491575                 | -2.482894 | 0.960763  | H           | -0.13229                  | -1.367282 | -1.154568 |
| O                            | 0.479043                  | -3.125471 | -0.247157 | H           | 1.272005                  | -2.824643 | -0.741994 |
| H                            | -3.40334                  | -2.054337 | -1.456652 |             |                           |           |           |
| H                            | -4.570669                 | -1.054448 | -0.609671 |             |                           |           |           |
| H                            | -2.315933                 | -0.181564 | -2.451155 |             |                           |           |           |
| H                            | -4.026464                 | 0.208774  | -2.518951 |             |                           |           |           |
| H                            | -1.098065                 | 2.540443  | -1.367016 |             |                           |           |           |
| H                            | -0.823698                 | 0.831681  | -1.119731 |             |                           |           |           |
| H                            | -1.704098                 | 1.212972  | 1.312158  |             |                           |           |           |
| H                            | -1.524308                 | 2.916729  | 0.991869  |             |                           |           |           |

**Table S17** Energy analyses of 1*S*,7*S*,8*R*,10*S*-**8** (four conformers)

| NO.                                                                         | 3D conformers<br>B3LYP/6-31G(d,p)                                                   | E (Hartree)  | $\Delta E$<br>(KJ/mol) | Boltzmann<br>distribution |
|-----------------------------------------------------------------------------|-------------------------------------------------------------------------------------|--------------|------------------------|---------------------------|
| 1 <i>S</i> ,7 <i>S</i> ,8 <i>R</i> ,10 <i>S</i> - <b>8</b><br>(conformer 1) | 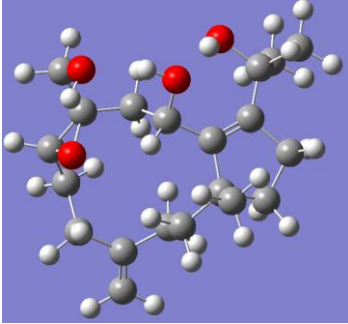   | -1081.756891 | 0                      | 88.45%                    |
| 1 <i>S</i> ,7 <i>S</i> ,8 <i>R</i> ,10 <i>S</i> - <b>8</b><br>(conformer 2) |   | -1081.753153 | 9.814114681            | 1.69%                     |
| 1 <i>S</i> ,7 <i>S</i> ,8 <i>R</i> ,10 <i>S</i> - <b>8</b><br>(conformer 3) |  | -1081.754016 | 7.548309178            | 4.21%                     |
| 1 <i>S</i> ,7 <i>S</i> ,8 <i>R</i> ,10 <i>S</i> - <b>8</b><br>(conformer 4) |  | -1081.754294 | 6.8184205              | 5.65%                     |

**Table S18** Cartesian coordinates of the low-energy re-optimized conformers of 1*S*,7*S*,8*R*,10*S*-**8** calculated at B3LYP/6-31G(d,p) level of theory

| 1 <i>S</i> ,7 <i>S</i> ,8 <i>R</i> ,10 <i>S</i> - <b>8</b> (conformer 1) |                           |           |           |        |                           |           |           |
|--------------------------------------------------------------------------|---------------------------|-----------|-----------|--------|---------------------------|-----------|-----------|
| Atomic                                                                   | Standard Orientation (Å ) |           |           | Atomic | Standard Orientation (Å ) |           |           |
| Type                                                                     | X                         | Y         | Z         | Type   | X                         | Y         | Z         |
| C                                                                        | -3.314475                 | 0.22175   | -1.25856  | H      | -3.818856                 | 2.332618  | -0.773084 |
| C                                                                        | -3.598069                 | -0.9237   | -0.239825 | H      | -0.430773                 | 0.548505  | 1.443159  |
| C                                                                        | -2.921407                 | -2.243562 | -0.566773 | H      | 0.265565                  | 1.80833   | -1.214293 |
| C                                                                        | -1.404906                 | -2.319463 | -0.471353 | H      | -0.723218                 | 0.37475   | -1.146043 |
| C                                                                        | -0.851945                 | -2.104919 | 0.957411  | H      | 1.802852                  | -3.682358 | 1.055156  |
| C                                                                        | -3.041391                 | 1.582819  | -0.610601 | H      | 1.065672                  | -3.236294 | -0.483819 |
| C                                                                        | 0.663073                  | -1.787231 | 1.097879  | H      | 3.248772                  | -2.456457 | -0.96942  |
| C                                                                        | 1.135773                  | -0.467643 | 0.441245  | H      | 3.61261                   | -2.100274 | 0.709931  |
| C                                                                        | 0.324209                  | 0.790061  | 0.685988  | H      | -3.175788                 | -4.271779 | -1.140013 |
| C                                                                        | -0.436847                 | 1.259928  | -0.579401 | H      | -4.727413                 | -3.279924 | -0.982083 |
| C                                                                        | -1.678726                 | 2.095776  | -0.298682 | H      | 5.169809                  | 1.29657   | -0.599216 |
| C                                                                        | 1.569055                  | -2.834259 | 0.401586  | H      | 4.34001                   | 0.892913  | 0.919089  |
| C                                                                        | 2.815471                  | -2.053696 | -0.046863 | H      | 5.099555                  | -0.391348 | -0.044681 |
| C                                                                        | 2.319618                  | -0.619684 | -0.189724 | H      | 4.079585                  | 0.764499  | -2.828088 |
| C                                                                        | -3.64246                  | -3.315763 | -0.91396  | H      | 2.564566                  | -0.155947 | -2.885726 |
| C                                                                        | 3.216717                  | 0.404913  | -0.885758 | H      | 4.074705                  | -0.955945 | -2.388374 |
| C                                                                        | 4.541801                  | 0.54998   | -0.102066 | H      | 2.285156                  | 1.946905  | -0.119549 |
| C                                                                        | 3.502568                  | -0.025157 | -2.336259 | H      | 0.457843                  | -0.887573 | 3.095826  |
| O                                                                        | 2.616877                  | 1.691092  | -1.009187 | H      | 0.686897                  | -2.643847 | 3.117895  |
| C                                                                        | 0.985836                  | -1.717523 | 2.611216  | H      | 2.057908                  | -1.566602 | 2.778316  |
| O                                                                        | 1.160745                  | 1.830432  | 1.229416  | H      | 0.59695                   | 2.631017  | 1.317891  |
| C                                                                        | -1.472199                 | 3.588375  | -0.104704 | H      | -0.799867                 | 4.003977  | -0.859462 |
| O                                                                        | -2.554412                 | 1.587548  | 0.744441  | H      | -2.430529                 | 4.121806  | -0.155414 |
| O                                                                        | -0.847765                 | 3.832593  | 1.164676  | H      | -1.459626                 | 3.469278  | 1.829147  |
| H                                                                        | -4.171674                 | 0.334435  | -1.930676 |        |                           |           |           |
| H                                                                        | -2.474911                 | -0.053884 | -1.904544 |        |                           |           |           |
| H                                                                        | -3.273017                 | -0.583926 | 0.748218  |        |                           |           |           |
| H                                                                        | -4.67897                  | -1.084746 | -0.168994 |        |                           |           |           |
| H                                                                        | -0.951508                 | -1.583501 | -1.148029 |        |                           |           |           |
| H                                                                        | -1.085767                 | -3.297466 | -0.847329 |        |                           |           |           |
| H                                                                        | -1.065444                 | -3.009059 | 1.543759  |        |                           |           |           |
| H                                                                        | -1.414827                 | -1.304016 | 1.450896  |        |                           |           |           |

| 1S,7S,8R,10S-8 (conformer 2) |                           |           |           |        |                           |           |           |
|------------------------------|---------------------------|-----------|-----------|--------|---------------------------|-----------|-----------|
| Atomic                       | Standard Orientation (Å ) |           |           | Atomic | Standard Orientation (Å ) |           |           |
| Type                         | X                         | Y         | Z         | Type   | X                         | Y         | Z         |
| C                            | -3.395991                 | 0.091977  | -1.476613 | H      | -3.93233                  | 2.111179  | -0.76574  |
| C                            | -3.833185                 | -1.181798 | -0.680456 | H      | -0.358688                 | 0.553589  | 1.562739  |
| C                            | -2.728243                 | -2.214302 | -0.520408 | H      | 0.088701                  | 1.627995  | -1.237166 |
| C                            | -1.721227                 | -1.961749 | 0.590151  | H      | -0.793748                 | 0.140222  | -0.983933 |
| C                            | -0.28671                  | -2.474015 | 0.333904  | H      | 2.785408                  | -2.466594 | 1.859793  |
| C                            | -3.149467                 | 1.356986  | -0.656219 | H      | 2.01688                   | -3.630299 | 0.779288  |
| C                            | 0.85805                   | -1.77129  | 1.134585  | H      | 2.711905                  | -2.355921 | -1.175754 |
| C                            | 1.237831                  | -0.394769 | 0.528287  | H      | 4.015416                  | -1.913624 | -0.087246 |
| C                            | 0.325559                  | 0.797811  | 0.742867  | H      | -1.881973                 | -4.019013 | -1.262264 |
| C                            | -0.539111                 | 1.093637  | -0.517331 | H      | -3.422366                 | -3.445205 | -2.101125 |
| C                            | -1.817091                 | 1.866983  | -0.23688  | H      | 4.98554                   | 1.751396  | -0.68378  |
| C                            | 2.18579                   | -2.560612 | 0.946187  | H      | 4.136097                  | 1.390048  | 0.836531  |
| C                            | 2.926185                  | -1.875091 | -0.209655 | H      | 5.070699                  | 0.120928  | 0.020012  |
| C                            | 2.373698                  | -0.457029 | -0.199095 | H      | 4.04205                   | 0.956749  | -2.883108 |
| C                            | -2.671756                 | -3.276203 | -1.332246 | H      | 2.63195                   | -0.117086 | -2.927491 |
| C                            | 3.148663                  | 0.629298  | -0.949152 | H      | 4.194186                  | -0.724856 | -2.329127 |
| C                            | 4.41883                   | 0.986644  | -0.141805 | H      | 2.077704                  | 2.125424  | -0.294104 |
| C                            | 3.530223                  | 0.144147  | -2.357997 | H      | -0.430732                 | -1.178695 | 2.835943  |
| O                            | 2.403655                  | 1.8242    | -1.171067 | H      | 0.40789                   | -2.716852 | 3.043337  |
| C                            | 0.508751                  | -1.703117 | 2.634367  | H      | 1.302452                  | -1.192931 | 3.191722  |
| O                            | 1.094304                  | 1.942218  | 1.156291  | H      | 0.446632                  | 2.649484  | 1.371839  |
| C                            | -1.688075                 | 3.351415  | 0.069963  | H      | -0.9922                   | 3.840137  | -0.616941 |
| O                            | -2.720991                 | 1.235107  | 0.71484   | H      | -2.664617                 | 3.846114  | -0.01232  |
| O                            | -1.157789                 | 3.556016  | 1.387183  | H      | -1.755476                 | 3.077902  | 1.988804  |
| H                            | -4.187286                 | 0.341808  | -2.192542 |        |                           |           |           |
| H                            | -2.517518                 | -0.152283 | -2.082684 |        |                           |           |           |
| H                            | -4.2126                   | -0.87929  | 0.30335   |        |                           |           |           |
| H                            | -4.669724                 | -1.644644 | -1.214429 |        |                           |           |           |
| H                            | -2.112202                 | -2.421817 | 1.510435  |        |                           |           |           |
| H                            | -1.723091                 | -0.892731 | 0.804202  |        |                           |           |           |
| H                            | -0.057917                 | -2.387828 | -0.735848 |        |                           |           |           |
| H                            | -0.250817                 | -3.547168 | 0.564899  |        |                           |           |           |

| 1S,7S,8R,10S-8 (conformer 3) |                           |           |           |        |                           |           |           |
|------------------------------|---------------------------|-----------|-----------|--------|---------------------------|-----------|-----------|
| Atomic                       | Standard Orientation (Å ) |           |           | Atomic | Standard Orientation (Å ) |           |           |
| Type                         | X                         | Y         | Z         | Type   | X                         | Y         | Z         |
| C                            | 2.936646                  | 0.224495  | 1.946072  | H      | 3.89248                   | 1.892359  | 0.866572  |
| C                            | 3.5474                    | -1.154498 | 1.595589  | H      | 0.474952                  | 0.380992  | -1.41157  |
| C                            | 2.905305                  | -1.928238 | 0.453999  | H      | -0.246724                 | 2.216793  | 0.841735  |
| C                            | 1.396325                  | -2.140685 | 0.496699  | H      | 0.392738                  | 0.664874  | 1.290671  |
| C                            | 0.715638                  | -2.194835 | -0.887556 | H      | -1.94802                  | -3.692051 | -0.617608 |
| C                            | 2.990207                  | 1.274638  | 0.847087  | H      | -1.139721                 | -3.056988 | 0.819033  |
| C                            | -0.791823                 | -1.835334 | -0.950336 | H      | -3.312683                 | -2.189926 | 1.270219  |
| C                            | -1.185392                 | -0.441932 | -0.402383 | H      | -3.715406                 | -2.031349 | -0.430561 |
| C                            | -0.318637                 | 0.750138  | -0.754358 | H      | 3.262125                  | -3.043699 | -1.321312 |
| C                            | 0.377827                  | 1.394885  | 0.481874  | H      | 4.749621                  | -2.30525  | -0.518481 |
| C                            | 1.793472                  | 1.871475  | 0.189834  | H      | -5.178345                 | 1.499989  | 0.528274  |
| C                            | -1.678676                 | -2.769144 | -0.091135 | H      | -4.459796                 | 0.825563  | -0.949038 |
| C                            | -2.896733                 | -1.912535 | 0.294363  | H      | -5.154213                 | -0.259638 | 0.27368   |
| C                            | -2.362486                 | -0.48542  | 0.256213  | H      | -3.972696                 | 1.303313  | 2.745205  |
| C                            | 3.672338                  | -2.452486 | -0.507596 | H      | -2.431456                 | 0.432211  | 2.854077  |
| C                            | -3.214683                 | 0.643036  | 0.834685  | H      | -3.944738                 | -0.465785 | 2.588207  |
| C                            | -4.58997                  | 0.668073  | 0.127849  | H      | -2.290728                 | 2.026298  | -0.217274 |
| C                            | -3.403588                 | 0.455024  | 2.351089  | H      | -0.722136                 | -1.119696 | -3.026855 |
| O                            | -2.615237                 | 1.928891  | 0.704744  | H      | -0.95887                  | -2.870483 | -2.879335 |
| C                            | -1.219358                 | -1.899777 | -2.438203 | H      | -2.299381                 | -1.753301 | -2.546966 |
| O                            | -1.079847                 | 1.719592  | -1.503643 | H      | -0.445562                 | 2.435565  | -1.722725 |
| C                            | 1.919612                  | 3.240324  | -0.452491 | H      | 1.385255                  | 3.998546  | 0.12689   |
| O                            | 2.623373                  | 0.894474  | -0.489437 | H      | 2.974884                  | 3.534826  | -0.524046 |
| O                            | 1.320537                  | 3.250477  | -1.757405 | H      | 1.824582                  | 2.611355  | -2.289902 |
| H                            | 3.486588                  | 0.628677  | 2.805601  |        |                           |           |           |
| H                            | 1.910415                  | 0.083496  | 2.29546   |        |                           |           |           |
| H                            | 4.617346                  | -1.03825  | 1.384322  |        |                           |           |           |
| H                            | 3.48246                   | -1.757755 | 2.514809  |        |                           |           |           |
| H                            | 0.931612                  | -1.34752  | 1.088307  |        |                           |           |           |
| H                            | 1.187965                  | -3.064648 | 1.056282  |        |                           |           |           |
| H                            | 0.830969                  | -3.200581 | -1.313646 |        |                           |           |           |
| H                            | 1.265328                  | -1.528632 | -1.561879 |        |                           |           |           |

| 1S,7S,8R,10S-8 (conformer 4) |                           |           |           |        |                           |           |           |
|------------------------------|---------------------------|-----------|-----------|--------|---------------------------|-----------|-----------|
| Atomic                       | Standard Orientation (Å ) |           |           | Atomic | Standard Orientation (Å ) |           |           |
| Type                         | X                         | Y         | Z         | Type   | X                         | Y         | Z         |
| C                            | -3.30308                  | 0.331883  | -1.18387  | H      | -3.779431                 | 2.430847  | -0.637498 |
| C                            | -3.617829                 | -0.829643 | -0.195306 | H      | -0.470868                 | 0.45883   | 1.463706  |
| C                            | -2.998457                 | -2.161098 | -0.579652 | H      | 0.330545                  | 1.89636   | -1.066982 |
| C                            | -1.48436                  | -2.285114 | -0.516197 | H      | -0.692062                 | 0.487395  | -1.147012 |
| C                            | -0.906104                 | -2.169112 | 0.913642  | H      | 1.71682                   | -3.789173 | 0.896643  |
| C                            | -3.008643                 | 1.668674  | -0.498423 | H      | 0.969236                  | -3.257972 | -0.610444 |
| C                            | 0.613632                  | -1.877599 | 1.041687  | H      | 3.164996                  | -2.4948   | -1.084261 |
| C                            | 1.095056                  | -0.538568 | 0.432797  | H      | 3.54878                   | -2.223405 | 0.606473  |
| C                            | 0.310434                  | 0.723176  | 0.743086  | H      | -3.33113                  | -4.158017 | -1.218502 |
| C                            | -0.402702                 | 1.315997  | -0.499765 | H      | -4.845756                 | -3.122792 | -0.991754 |
| C                            | -1.636762                 | 2.158712  | -0.18353  | H      | 5.191396                  | 1.131475  | -0.612359 |
| C                            | 1.49112                   | -2.907354 | 0.286205  | H      | 4.430788                  | 0.61603   | 0.907566  |
| C                            | 2.74603                   | -2.128565 | -0.139597 | H      | 5.075291                  | -0.59806  | -0.217514 |
| C                            | 2.273545                  | -0.681386 | -0.211249 | H      | 3.980989                  | 0.824459  | -2.817782 |
| C                            | -3.761375                 | -3.196144 | -0.948949 | H      | 2.402733                  | 0.015677  | -2.868336 |
| C                            | 3.187237                  | 0.354547  | -0.86682  | H      | 3.874008                  | -0.923409 | -2.521742 |
| C                            | 4.558649                  | 0.365763  | -0.151838 | H      | 2.323033                  | 1.844631  | 0.066703  |
| C                            | 3.373133                  | 0.035974  | -2.361922 | H      | 0.461628                  | -1.051036 | 3.074338  |
| O                            | 2.656727                  | 1.676727  | -0.844071 | H      | 0.651263                  | -2.812326 | 3.026479  |
| C                            | 0.962696                  | -1.873699 | 2.550724  | H      | 2.040456                  | -1.752693 | 2.705358  |
| O                            | 1.171055                  | 1.689891  | 1.379712  | H      | 0.656974                  | 2.523964  | 1.434136  |
| C                            | -1.425158                 | 3.654486  | -0.088819 | H      | -1.058895                 | 4.030078  | -1.054983 |
| O                            | -2.507309                 | 1.64217   | 0.845723  | H      | -2.37658                  | 4.149263  | 0.145238  |
| O                            | -0.470231                 | 3.918823  | 0.948924  | H      | -0.104791                 | 4.806666  | 0.822033  |
| H                            | -4.151366                 | 0.478022  | -1.861107 |        |                           |           |           |
| H                            | -2.463369                 | 0.052529  | -1.828096 |        |                           |           |           |
| H                            | -3.259092                 | -0.533239 | 0.795332  |        |                           |           |           |
| H                            | -4.703005                 | -0.948593 | -0.106855 |        |                           |           |           |
| H                            | -1.021287                 | -1.519756 | -1.152639 |        |                           |           |           |
| H                            | -1.196341                 | -3.246564 | -0.954974 |        |                           |           |           |
| H                            | -1.119292                 | -3.106    | 1.446195  |        |                           |           |           |
| H                            | -1.449986                 | -1.394856 | 1.467124  |        |                           |           |           |

**Table S19** Experimental and calculated <sup>1</sup>H NMR data for compound **8**

| No. | <b>8</b> , exptl. $\delta_{\text{H}}$ <sup>a</sup> | 1 <i>R</i> ,7 <i>R</i> ,8 <i>S</i> ,10 <i>R</i> - <b>8</b> , calcd. $\delta_{\text{H}}$ <sup>b</sup> | 1 <i>S</i> ,7 <i>S</i> ,8 <i>R</i> ,10 <i>S</i> - <b>8</b> , calcd. $\delta_{\text{H}}$ <sup>b</sup> |
|-----|----------------------------------------------------|------------------------------------------------------------------------------------------------------|------------------------------------------------------------------------------------------------------|
| 2   | 1.32                                               | 1.17                                                                                                 | 1.26                                                                                                 |
|     | 1.74                                               | 1.68                                                                                                 | 1.73                                                                                                 |
| 3   | 1.79                                               | 1.79                                                                                                 | 2.03                                                                                                 |
|     | 2.04                                               | 2.22                                                                                                 | 2.16                                                                                                 |
| 5   | 2.27                                               | 2.40                                                                                                 | 2.27                                                                                                 |
|     | 2.46                                               | 2.45                                                                                                 | 2.66                                                                                                 |
| 6   | 1.49                                               | 1.18                                                                                                 | 1.44                                                                                                 |
|     | 1.96                                               | 2.13                                                                                                 | 2.04                                                                                                 |
| 7   | 3.13                                               | 3.04                                                                                                 | 3.34                                                                                                 |
| 9   | 1.96                                               | 1.63                                                                                                 | 1.83                                                                                                 |
|     | 2.58                                               | 2.83                                                                                                 | 3.01                                                                                                 |
| 10  | 4.37                                               | 4.18                                                                                                 | 4.44                                                                                                 |
| 13  | 2.2                                                | 2.29                                                                                                 | 2.32                                                                                                 |
|     | 2.35                                               | 2.50                                                                                                 | 2.54                                                                                                 |
| 14  | 1.43                                               | 1.71                                                                                                 | 1.44                                                                                                 |
|     | 1.74                                               | 1.98                                                                                                 | 1.89                                                                                                 |
| 15  | 1.05                                               | 1.22                                                                                                 | 1.11                                                                                                 |
| 16  | 4.67                                               | 5.02                                                                                                 | 5.00                                                                                                 |
|     | 4.71                                               | 5.06                                                                                                 | 5.08                                                                                                 |
| 17  | 3.32                                               | 3.52                                                                                                 | 3.53                                                                                                 |
|     | 3.98                                               | 4.52                                                                                                 | 4.00                                                                                                 |
| 19  | 1.35                                               | 1.42                                                                                                 | 1.35                                                                                                 |
| 20  | 1.38                                               | 1.41                                                                                                 | 1.38                                                                                                 |

<sup>a</sup> Recorded in CDCl<sub>3</sub> at 600 MHz.<sup>b</sup> Calculated in CDCl<sub>3</sub>

**Table S20** Experimental and calculated  $^{13}\text{C}$  NMR data for compound **8**

| No. | <b>8</b> , exptl. $\delta_{\text{C}}$ <sup>a</sup> | 1 <i>R</i> ,7 <i>R</i> ,8 <i>S</i> ,10 <i>R</i> - <b>8</b> , calcd. $\delta_{\text{C}}$ <sup>b</sup> | 1 <i>S</i> ,7 <i>S</i> ,8 <i>R</i> ,10 <i>S</i> - <b>8</b> , calcd. $\delta_{\text{C}}$ <sup>b</sup> |
|-----|----------------------------------------------------|------------------------------------------------------------------------------------------------------|------------------------------------------------------------------------------------------------------|
| 1   | 53.1                                               | 52.88                                                                                                | 53.00                                                                                                |
| 2   | 35.7                                               | 35.70                                                                                                | 32.59                                                                                                |
| 3   | 29.9                                               | 29.84                                                                                                | 28.88                                                                                                |
| 4   | 150.3                                              | 153.27                                                                                               | 154.83                                                                                               |
| 5   | 28.7                                               | 29.02                                                                                                | 24.95                                                                                                |
| 6   | 22.3                                               | 24.65                                                                                                | 20.58                                                                                                |
| 7   | 60.2                                               | 61.36                                                                                                | 62.17                                                                                                |
| 8   | 63.8                                               | 59.06                                                                                                | 62.89                                                                                                |
| 9   | 37.8                                               | 39.73                                                                                                | 36.33                                                                                                |
| 10  | 65                                                 | 60.95                                                                                                | 63.32                                                                                                |
| 11  | 141.2                                              | 145.47                                                                                               | 143.22                                                                                               |
| 12  | 144.7                                              | 150.72                                                                                               | 152.53                                                                                               |
| 13  | 32.8                                               | 32.66                                                                                                | 31.03                                                                                                |
| 14  | 32.7                                               | 31.42                                                                                                | 29.44                                                                                                |
| 15  | 26.8                                               | 26.93                                                                                                | 21.18                                                                                                |
| 16  | 111.1                                              | 110.33                                                                                               | 111.98                                                                                               |
| 17  | 68.6                                               | 61.37                                                                                                | 68.24                                                                                                |
| 18  | 72.3                                               | 71.84                                                                                                | 70.58                                                                                                |
| 19  | 31                                                 | 22.68                                                                                                | 26.44                                                                                                |
| 20  | 29.7                                               | 24.56                                                                                                | 24.37                                                                                                |

<sup>a</sup> Recorded in  $\text{CDCl}_3$  at 600 MHz.<sup>b</sup> Calculated in  $\text{CDCl}_3$

**Table S21** DP4+ analyses of calculated and experimental NMR chemical shifts of **8** (unscaled). Isomer 1: 1*R*-7*R*-8*S*-10*R*-**8**; Isomer 2: 1*S*-7*S*-8*R*-10*S*-**8**

| Functional       | Solvent?                                                                                 |                                                                                           | Basis Set   |          | Type of Data    |          |
|------------------|------------------------------------------------------------------------------------------|-------------------------------------------------------------------------------------------|-------------|----------|-----------------|----------|
| mPW1PW91         | PCM                                                                                      |                                                                                           | 6-311G(d,p) |          | Unscaled Shifts |          |
|                  | Isomer 1                                                                                 | Isomer 2                                                                                  | Isomer 3    | Isomer 4 | Isomer 5        | Isomer 6 |
| sDP4+ (H data)   |  0.00%  |  100.00% | -           | -        | -               | -        |
| sDP4+ (C data)   |  0.00%  |  100.00% | -           | -        | -               | -        |
| sDP4+ (all data) |  0.00%  |  100.00% | -           | -        | -               | -        |
| uDP4+ (H data)   |  0.04%  |  99.96%  | -           | -        | -               | -        |
| uDP4+ (C data)   |  99.97% |  0.03%   | -           | -        | -               | -        |
| uDP4+ (all data) |  62.82% |  37.18%  | -           | -        | -               | -        |
| DP4+ (H data)    |  0.00%  |  100.00% | -           | -        | -               | -        |
| DP4+ (C data)    |  0.00%  |  100.00% | -           | -        | -               | -        |
| DP4+ (all data)  |  0.00%  |  100.00% | -           | -        | -               | -        |

| Functional<br>mPW1PW91 |      | Solvent?<br>PCM |                                                                                         | Basis Set<br>6-311G(d,p)                                                                  |          | Type of Data<br>Unscaled Shifts |          |
|------------------------|------|-----------------|-----------------------------------------------------------------------------------------|-------------------------------------------------------------------------------------------|----------|---------------------------------|----------|
|                        |      | DP4+            |  0.00% |  100.00% | -        | -                               | -        |
| Nuclei                 | sp2? | Experimental    | Isomer 1                                                                                | Isomer 2                                                                                  | Isomer 3 | Isomer 4                        | Isomer 5 |
| C                      |      | 53.1            | 52.8765                                                                                 | 52.998                                                                                    |          |                                 |          |
| C                      |      | 35.7            | 35.7018                                                                                 | 32.5932                                                                                   |          |                                 |          |
| C                      |      | 29.9            | 29.8413                                                                                 | 28.8842                                                                                   |          |                                 |          |
| C                      | x    | 150.3           | 153.2658                                                                                | 154.8336                                                                                  |          |                                 |          |
| C                      |      | 28.7            | 29.0241                                                                                 | 24.9488                                                                                   |          |                                 |          |
| C                      |      | 22.3            | 24.6492                                                                                 | 20.5768                                                                                   |          |                                 |          |
| C                      |      | 60.2            | 61.3587                                                                                 | 62.1674                                                                                   |          |                                 |          |
| C                      |      | 63.8            | 59.055                                                                                  | 62.887                                                                                    |          |                                 |          |
| C                      |      | 37.8            | 39.7287                                                                                 | 36.3324                                                                                   |          |                                 |          |
| C                      |      | 65              | 60.9468                                                                                 | 63.3236                                                                                   |          |                                 |          |
| C                      | x    | 141.2           | 145.4745                                                                                | 143.2214                                                                                  |          |                                 |          |
| C                      | x    | 144.7           | 150.717                                                                                 | 152.5332                                                                                  |          |                                 |          |
| C                      |      | 32.8            | 32.664                                                                                  | 31.0284                                                                                   |          |                                 |          |
| C                      |      | 32.7            | 31.419                                                                                  | 29.4386                                                                                   |          |                                 |          |
| C                      |      | 26.8            | 26.9277                                                                                 | 21.1754                                                                                   |          |                                 |          |
| C                      | x    | 111.1           | 110.3292                                                                                | 111.9846                                                                                  |          |                                 |          |
| C                      |      | 68.6            | 61.3713                                                                                 | 68.2414                                                                                   |          |                                 |          |
| C                      |      | 72.3            | 71.835                                                                                  | 70.5804                                                                                   |          |                                 |          |
| C                      |      | 31              | 22.6776                                                                                 | 26.4434                                                                                   |          |                                 |          |
| C                      |      | 29.7            | 24.5574                                                                                 | 24.368                                                                                    |          |                                 |          |
| H                      |      | 1.32            | 1.1742                                                                                  | 1.2562                                                                                    |          |                                 |          |
| H                      |      | 1.74            | 1.6818                                                                                  | 1.7252                                                                                    |          |                                 |          |
| H                      |      | 1.79            | 1.7907                                                                                  | 2.0314                                                                                    |          |                                 |          |
| H                      |      | 2.04            | 2.2218                                                                                  | 2.1616                                                                                    |          |                                 |          |
| H                      |      | 2.27            | 2.3967                                                                                  | 2.2684                                                                                    |          |                                 |          |
| H                      |      | 2.46            | 2.4456                                                                                  | 2.6622                                                                                    |          |                                 |          |
| H                      |      | 1.49            | 1.1787                                                                                  | 1.4376                                                                                    |          |                                 |          |
| H                      |      | 1.96            | 2.1279                                                                                  | 2.0406                                                                                    |          |                                 |          |
| H                      |      | 3.13            | 3.0423                                                                                  | 3.3376                                                                                    |          |                                 |          |
| H                      |      | 1.96            | 1.6332                                                                                  | 1.833                                                                                     |          |                                 |          |
| H                      |      | 2.58            | 2.8323                                                                                  | 3.0124                                                                                    |          |                                 |          |
| H                      |      | 4.37            | 4.1838                                                                                  | 4.4444                                                                                    |          |                                 |          |
| H                      |      | 2.2             | 2.2929                                                                                  | 2.3236                                                                                    |          |                                 |          |
| H                      |      | 2.35            | 2.4999                                                                                  | 2.5426                                                                                    |          |                                 |          |
| H                      |      | 1.43            | 1.7133                                                                                  | 1.4384                                                                                    |          |                                 |          |
| H                      |      | 1.74            | 1.9767                                                                                  | 1.8928                                                                                    |          |                                 |          |
| H                      |      | 1.05            | 1.2177                                                                                  | 1.11466632                                                                                |          |                                 |          |
| H                      | x    | 4.67            | 5.0229                                                                                  | 5.0086                                                                                    |          |                                 |          |
| H                      | x    | 4.71            | 5.0631                                                                                  | 5.0822                                                                                    |          |                                 |          |
| H                      |      | 3.32            | 3.5232                                                                                  | 3.5272                                                                                    |          |                                 |          |
| H                      |      | 3.98            | 4.515                                                                                   | 3.995                                                                                     |          |                                 |          |
| H                      |      | 1.35            | 1.4159                                                                                  | 1.34653326                                                                                |          |                                 |          |
| H                      |      | 1.38            | 1.412299                                                                                | 1.38059994                                                                                |          |                                 |          |

**Table S22** Cytotoxicity of active compounds against Human Oral Cancer (Ca9-22)

| Compound/tumor cell | Ca9-22 ( $\mu\text{M}$ ) | Compound/tumor cell | Ca9-22 ( $\mu\text{M}$ ) |
|---------------------|--------------------------|---------------------|--------------------------|
| <b>1</b>            | $212.64 \pm 2.64$        | <b>11</b>           | $238.51 \pm 9.24$        |
| <b>3</b>            | $239.09 \pm 2.17$        | <b>13</b>           | $112.45 \pm 1.4$         |
| <b>4</b>            | $231.02 \pm 11.72$       | <b>15</b>           | $24.87 \pm 3.0$          |
| <b>5</b>            | $87.39 \pm 4.42$         | <b>16</b>           | $166.7 \pm 2.97$         |
| <b>6</b>            | $31.51 \pm 16.03$        | <b>17</b>           | $156.99 \pm 20.47$       |
| <b>7</b>            | $15.65 \pm 0.37$         | <b>19</b>           | $190.26 \pm 13.59$       |
| <b>8</b>            | $118.72 \pm 4.14$        | <b>21</b>           | $72.23 \pm 12.74$        |
| <b>10</b>           | $194.62 \pm 4.97$        | <b>22</b>           | $43.62 \pm 5.79$         |

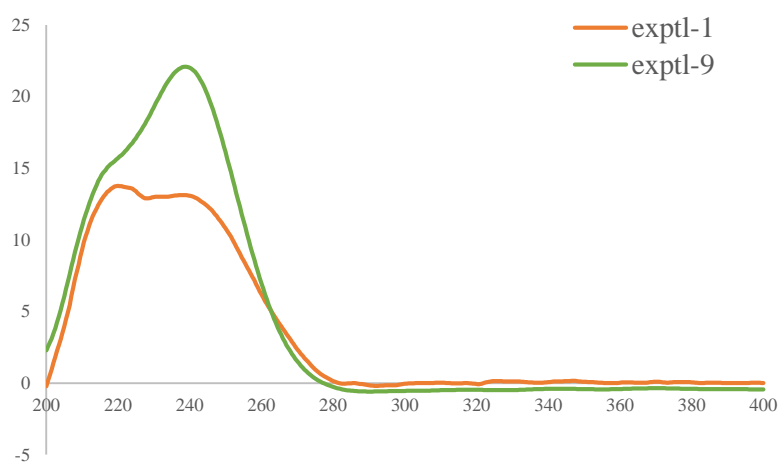

**Figure S1** Experimental ECD spectra of **1** and **9**

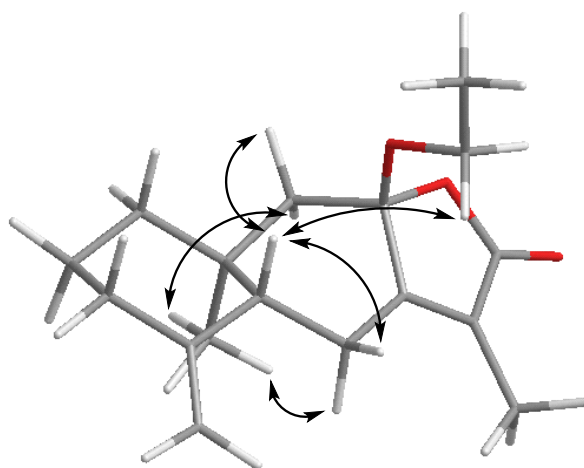

**Figure S2** NOESY (double arrow) correlations of **2**

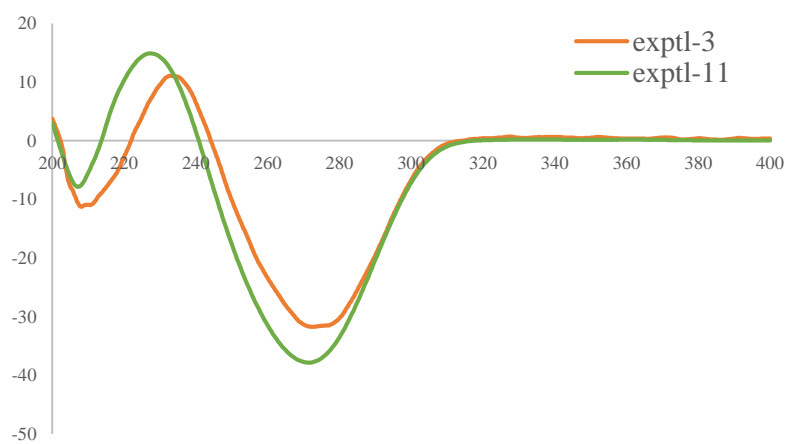

**Figure S3** Experimental ECD spectra of **3** and **11**

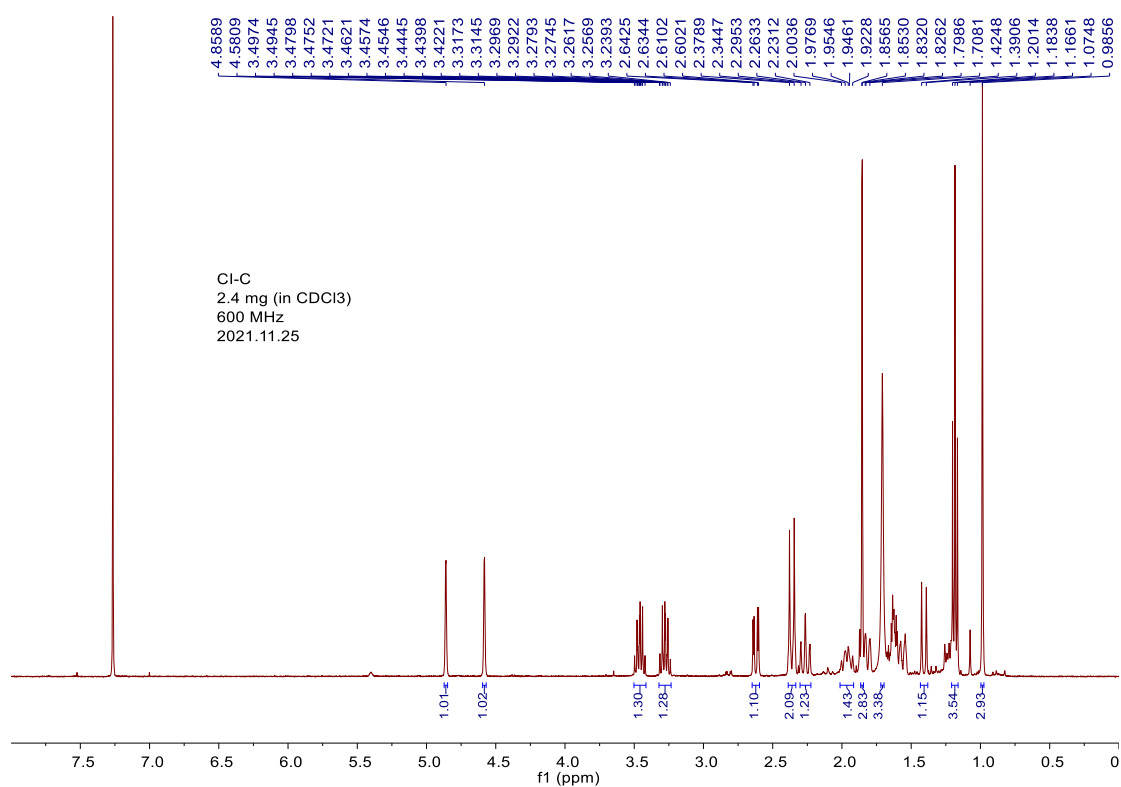

**Figure S4** <sup>1</sup>H NMR spectrum of **1** (600 MHz, CDCl<sub>3</sub>)

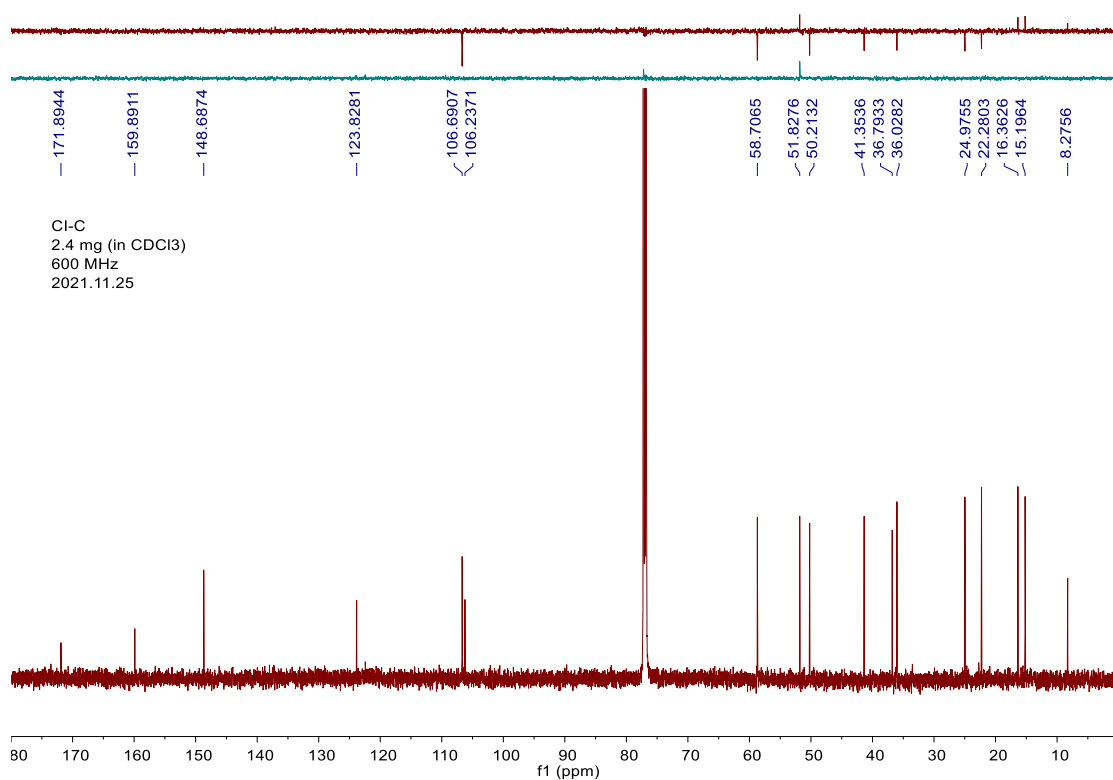

**Figure S5** <sup>13</sup>C NMR spectrum of **1** (125 MHz, CDCl<sub>3</sub>)

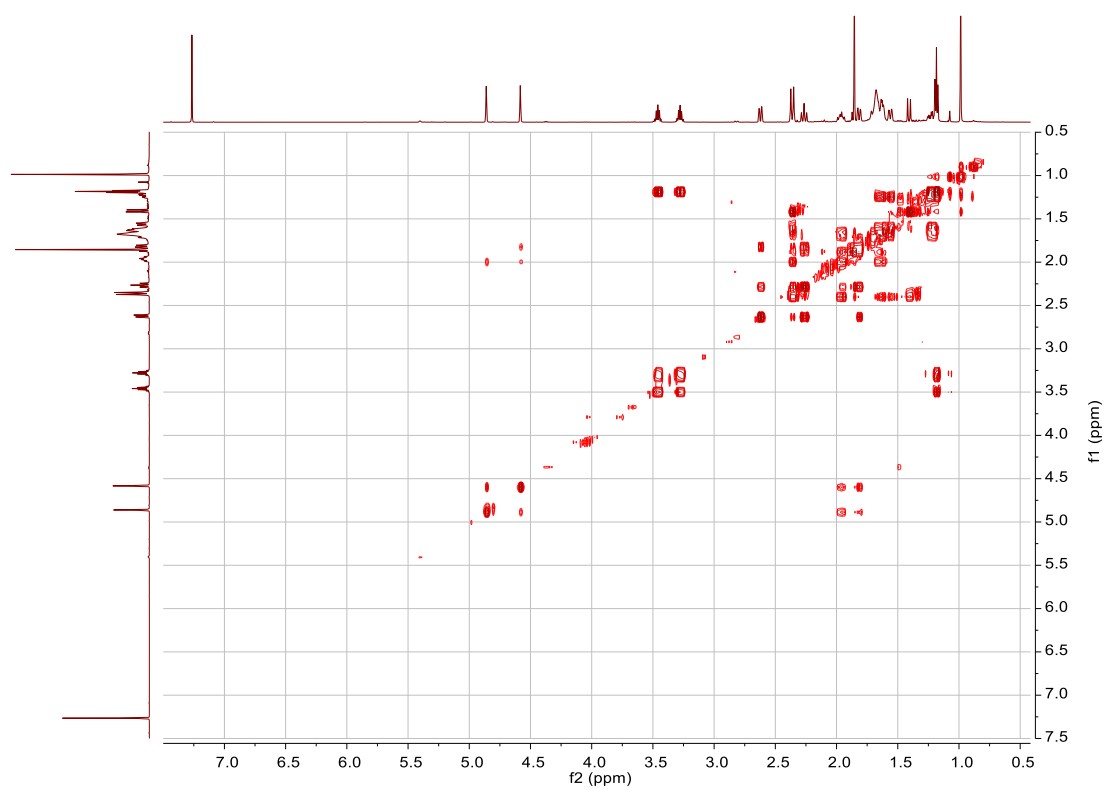

**Figure S6 COSY spectrum of 1**

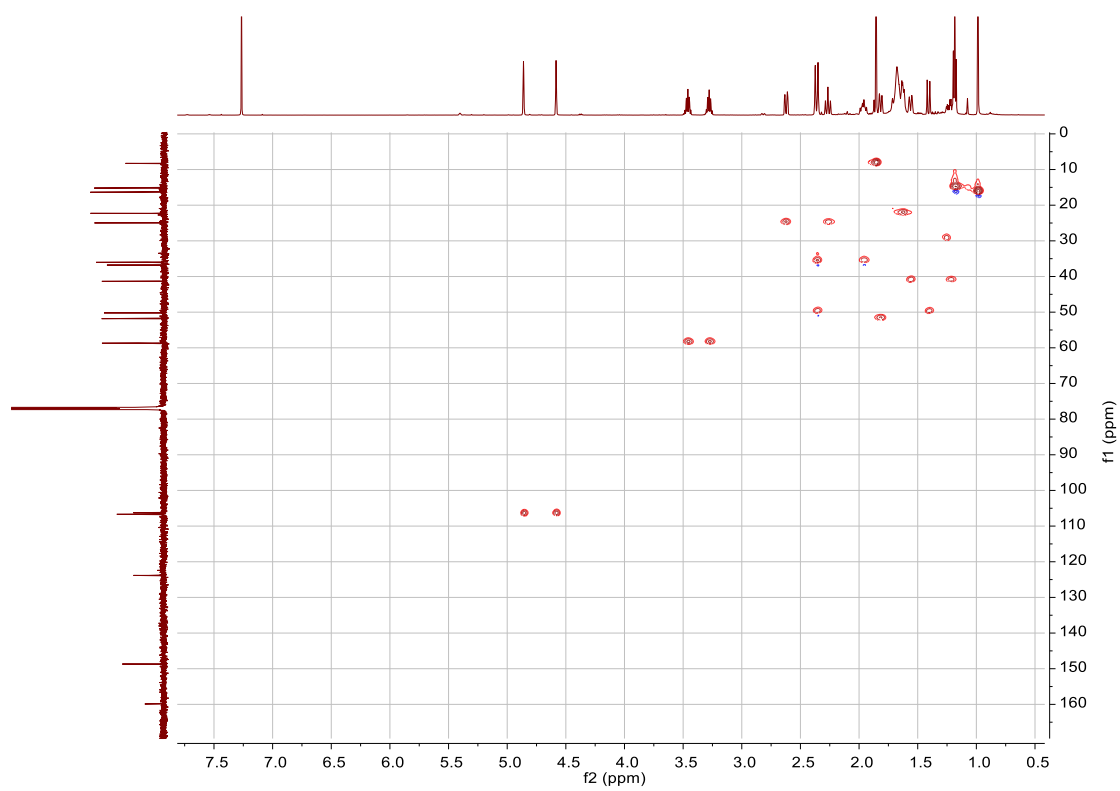

**Figure S7 HSQC spectrum of 1**

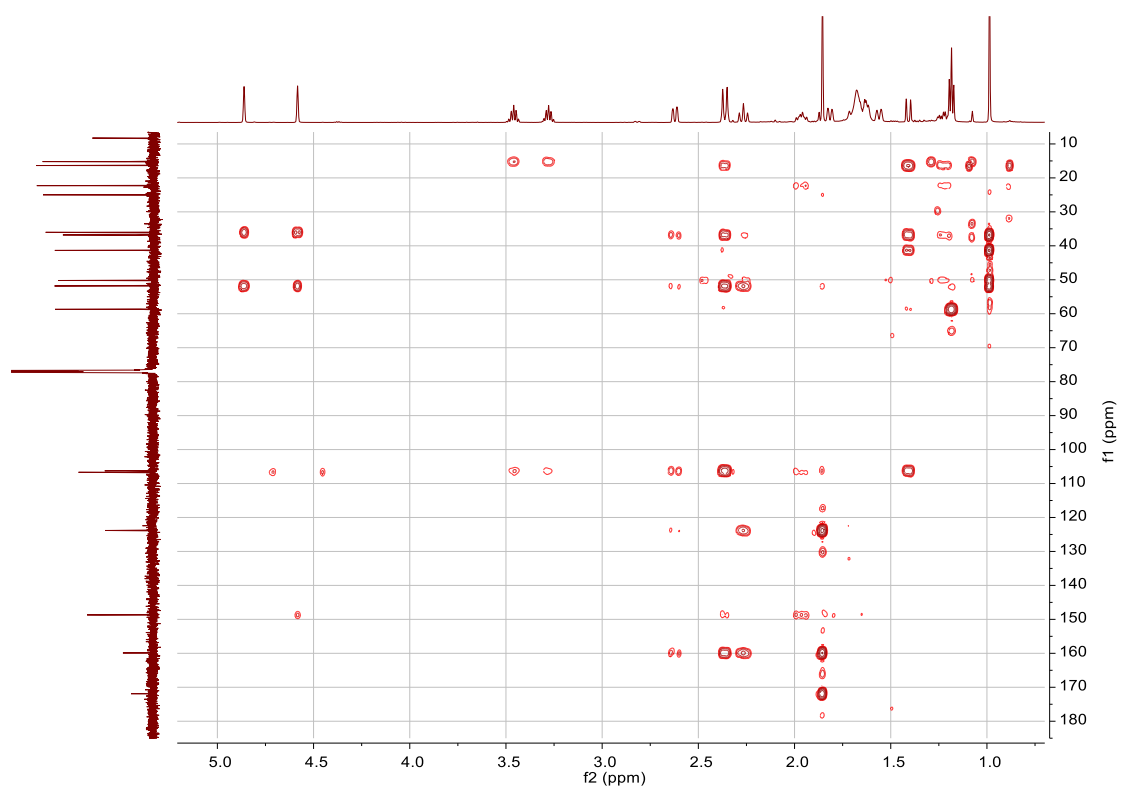

**Figure S8** HMBC spectrum of **1**

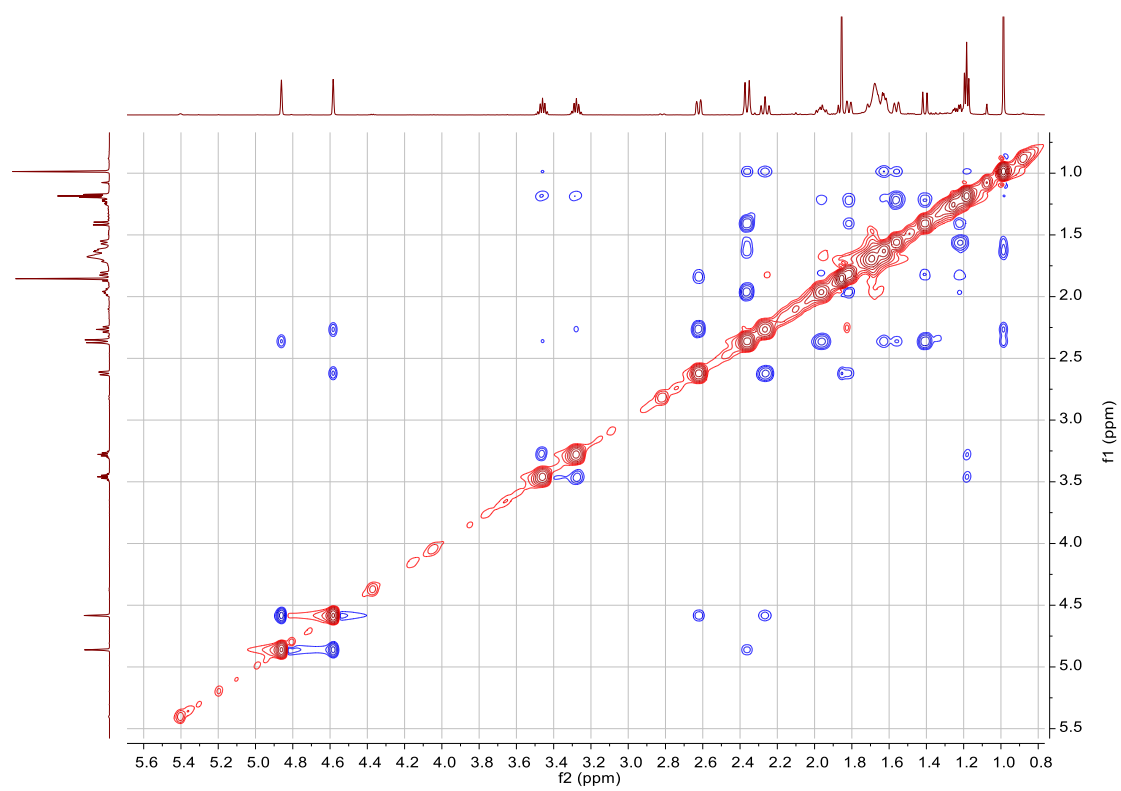

**Figure S9** NOESY spectrum of **1**

## Mass Spectrum SmartFormula Report

### Analysis Info

Analysis Name D:\QTOF\CICR.d  
Method \_tune\_low\_pos(50-1000)\_20170502\_Liao lab.m  
Sample Name Cl-C  
Comment ESI Positive

12/23/2021 1:03:53 PM  
Operator: YU HSIAO-CHING  
Instrument: BRUKER micrOTOF-Q

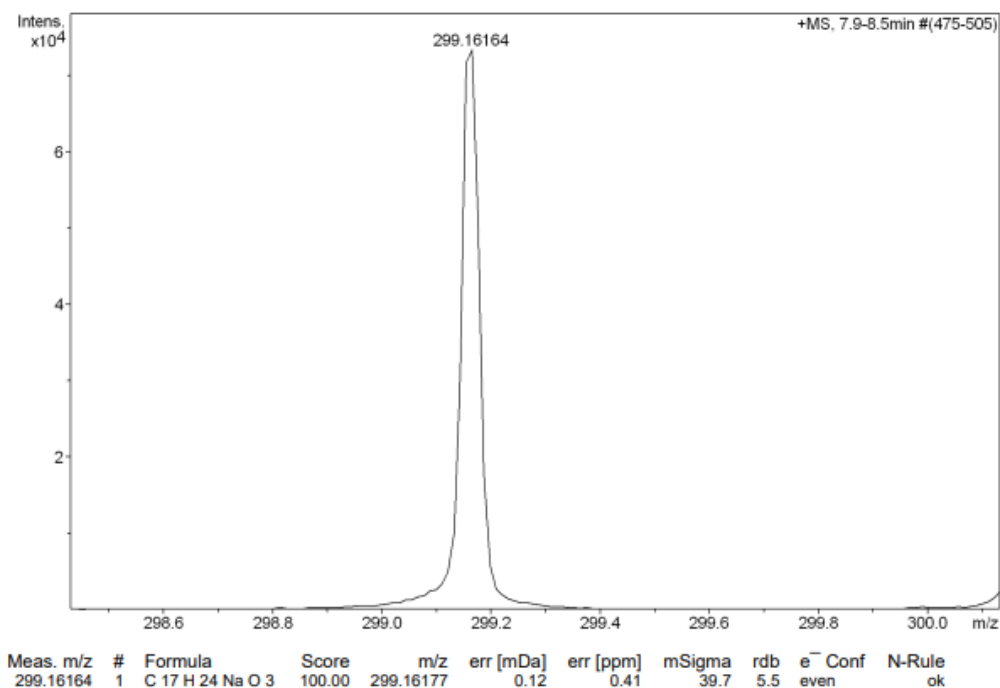

**Figure S10** HRESIMS spectrum of **1**

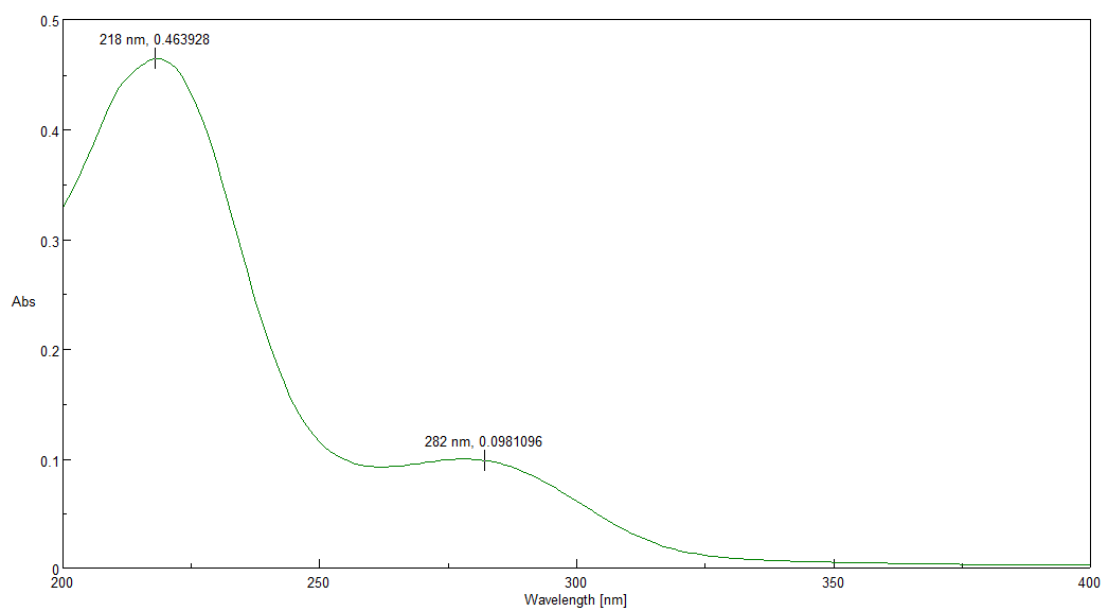

**Figure S11** UV spectrum of **1**

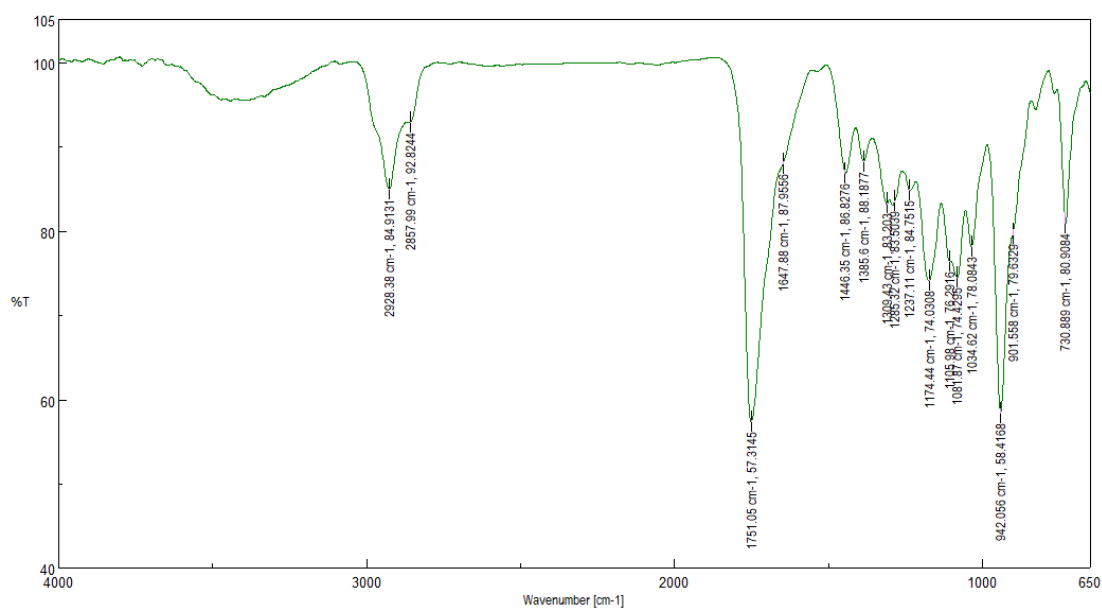

**Figure S12** IR spectrum of **1**

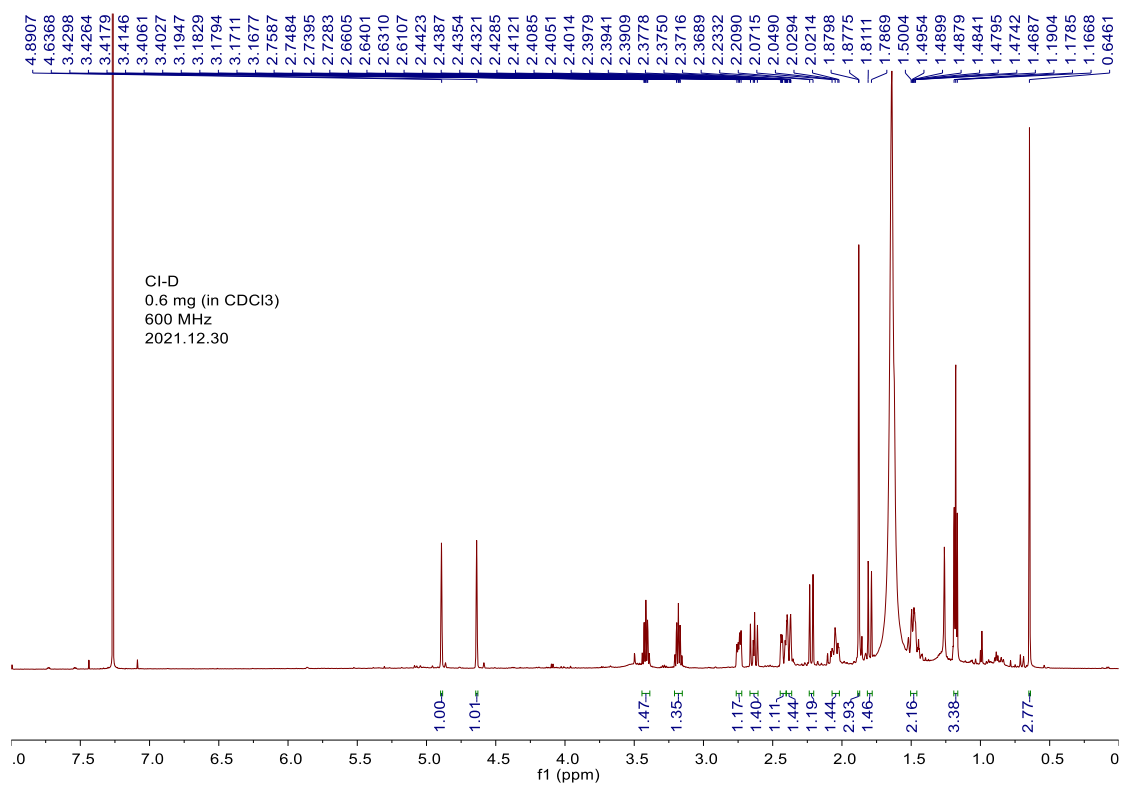

Figure S13 <sup>1</sup>H NMR spectrum of **2** (600 MHz, CDCl<sub>3</sub>)

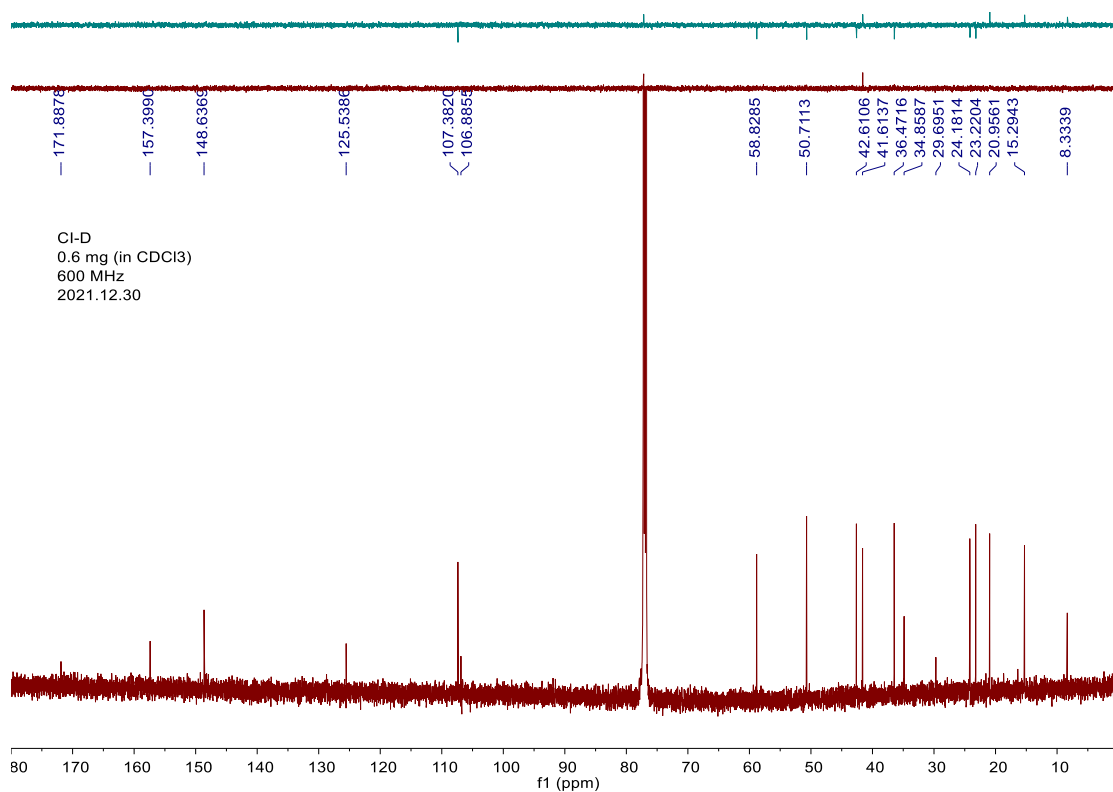

Figure S14 <sup>13</sup>C NMR spectrum of **2** (125 MHz, CDCl<sub>3</sub>)

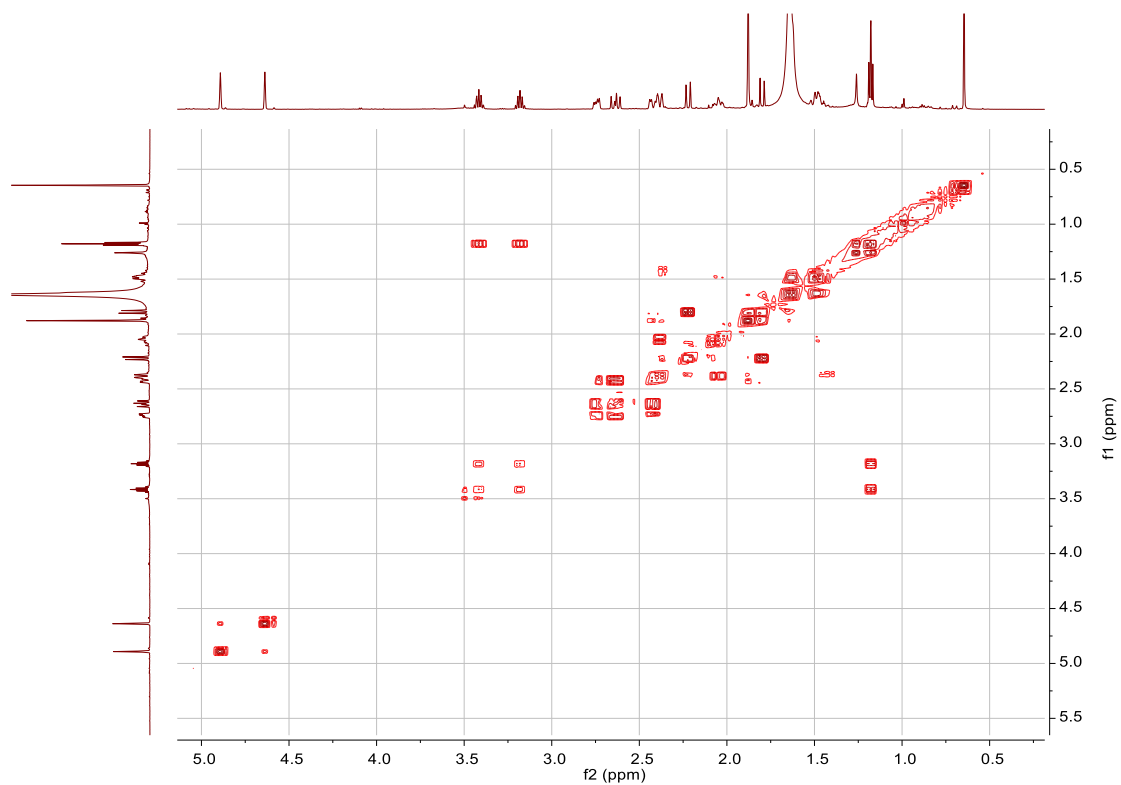

**Figure S15** COSY spectrum of **2**

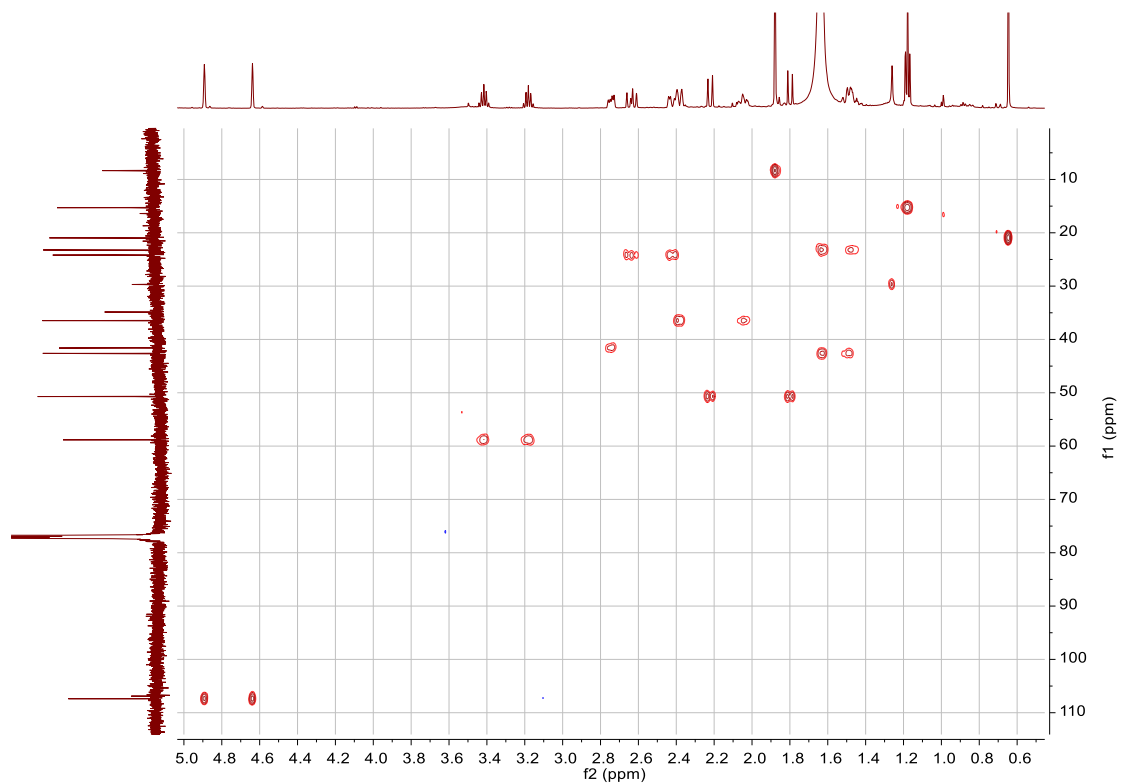

**Figure S16** HSQC spectrum of **2**

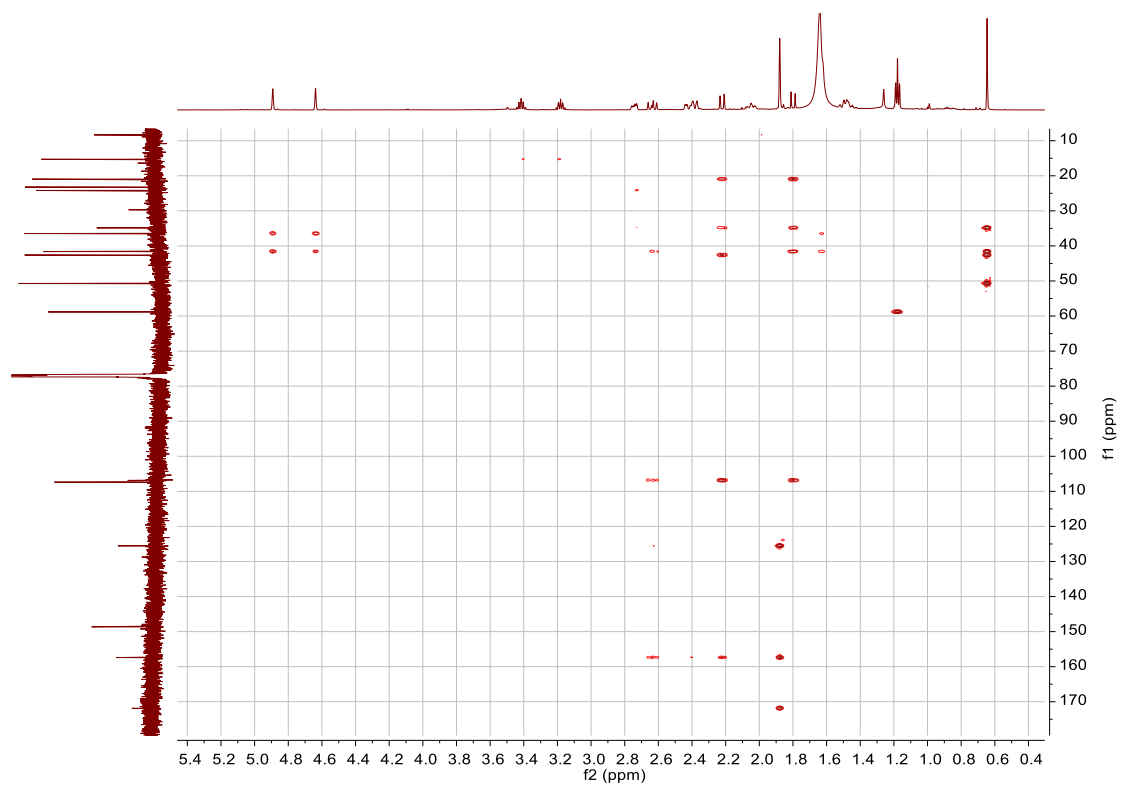

**Figure S17** HMBC spectrum of **2**

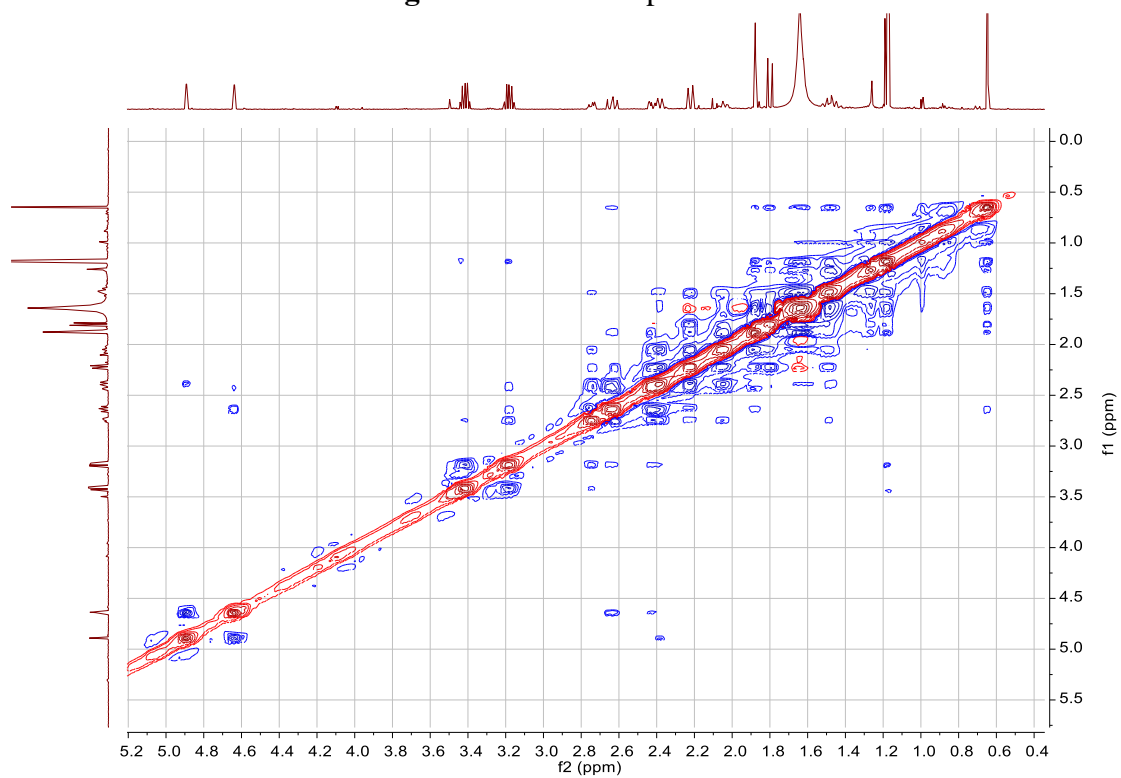

**Figure S18** NOESY spectrum of **2**

## Mass Spectrum SmartFormula Report

### Analysis Info

Analysis Name D:\1107\CIDR1.d  
Method tune\_wide\_pos\_20220422.m  
Sample Name CI-D  
Comment ESI Positive

11/8/2022 2:41:15 PM  
Operator: YU HSIAO-CHING  
Instrument: BRUKER microTOF-Q

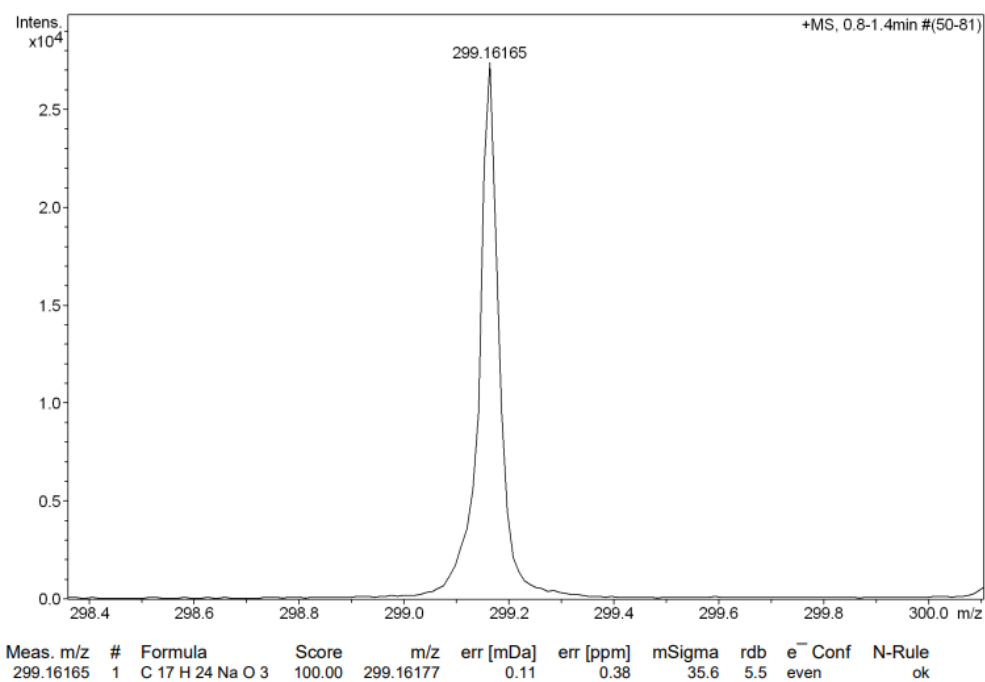

**Figure S19** HRESIMS spectrum of **2**

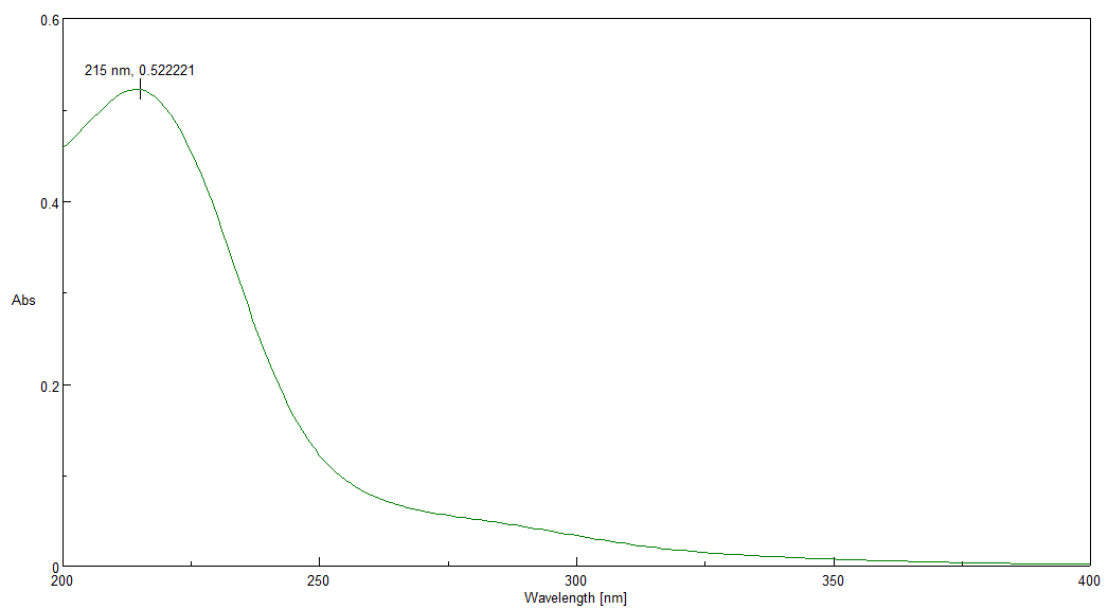

**Figure S20 UV spectrum of 2**

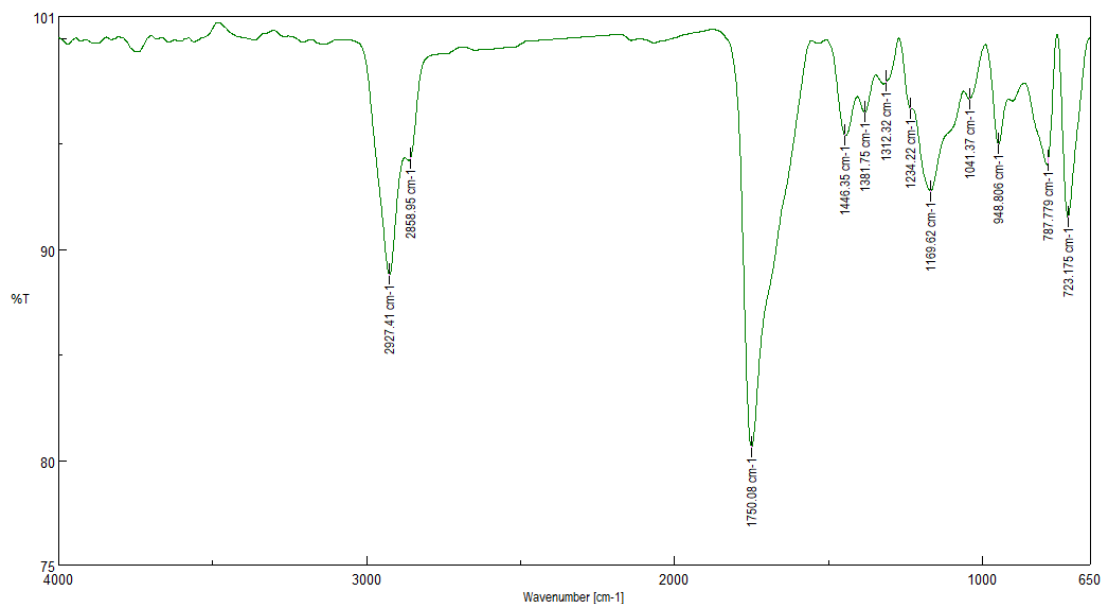

**Figure S21 IR spectrum of 2**

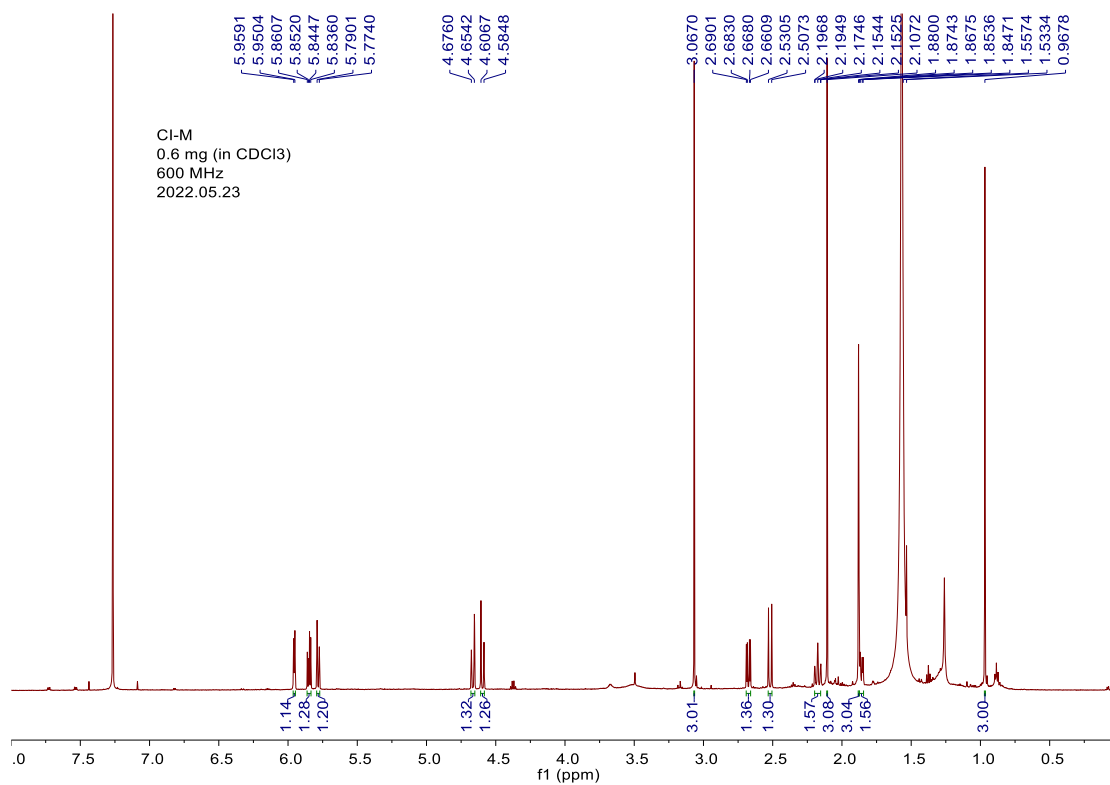

**Figure S22** <sup>1</sup>H NMR spectrum of **3** (600 MHz, CDCl<sub>3</sub>)

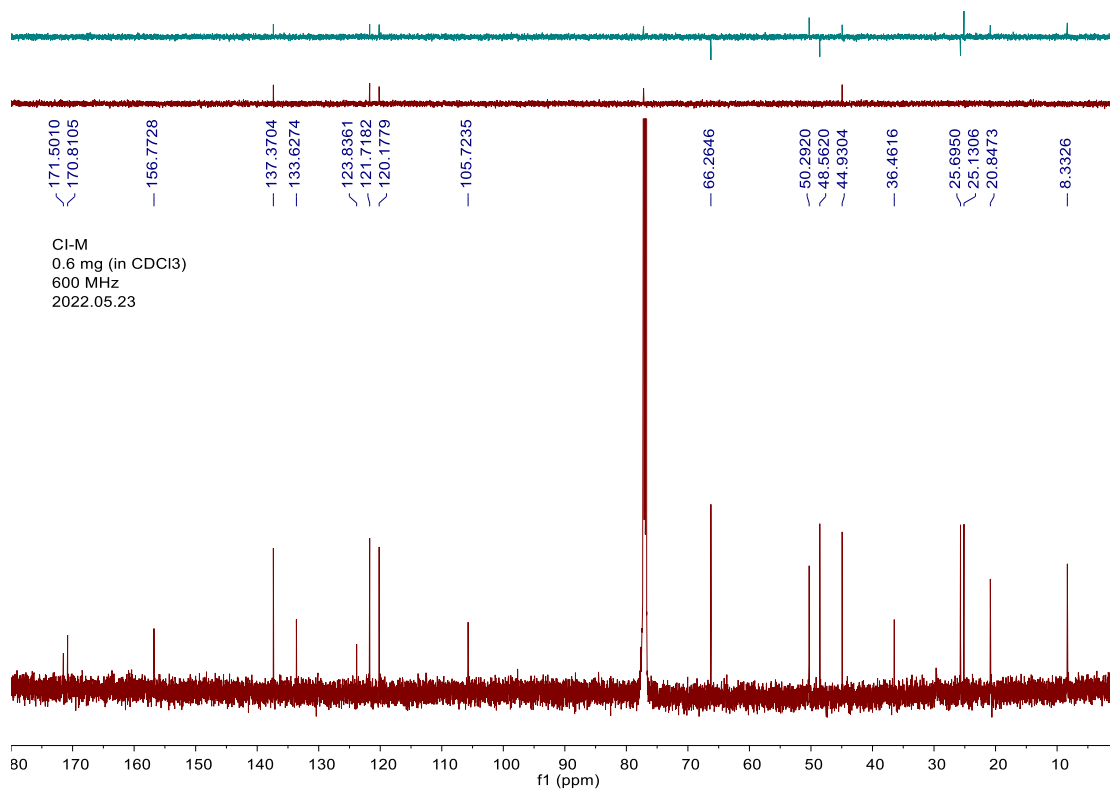

**Figure S23** <sup>13</sup>C NMR spectrum of **3** (125 MHz, CDCl<sub>3</sub>)

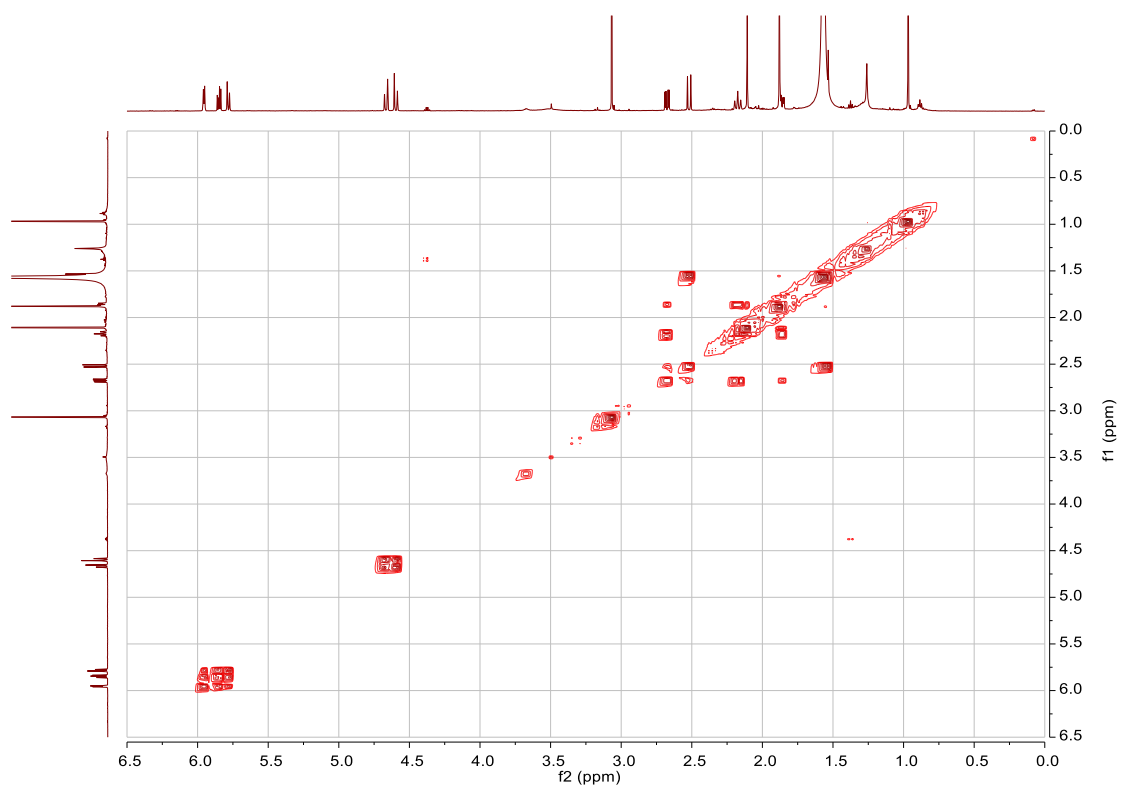

**Figure S24** COSY spectrum of **3**

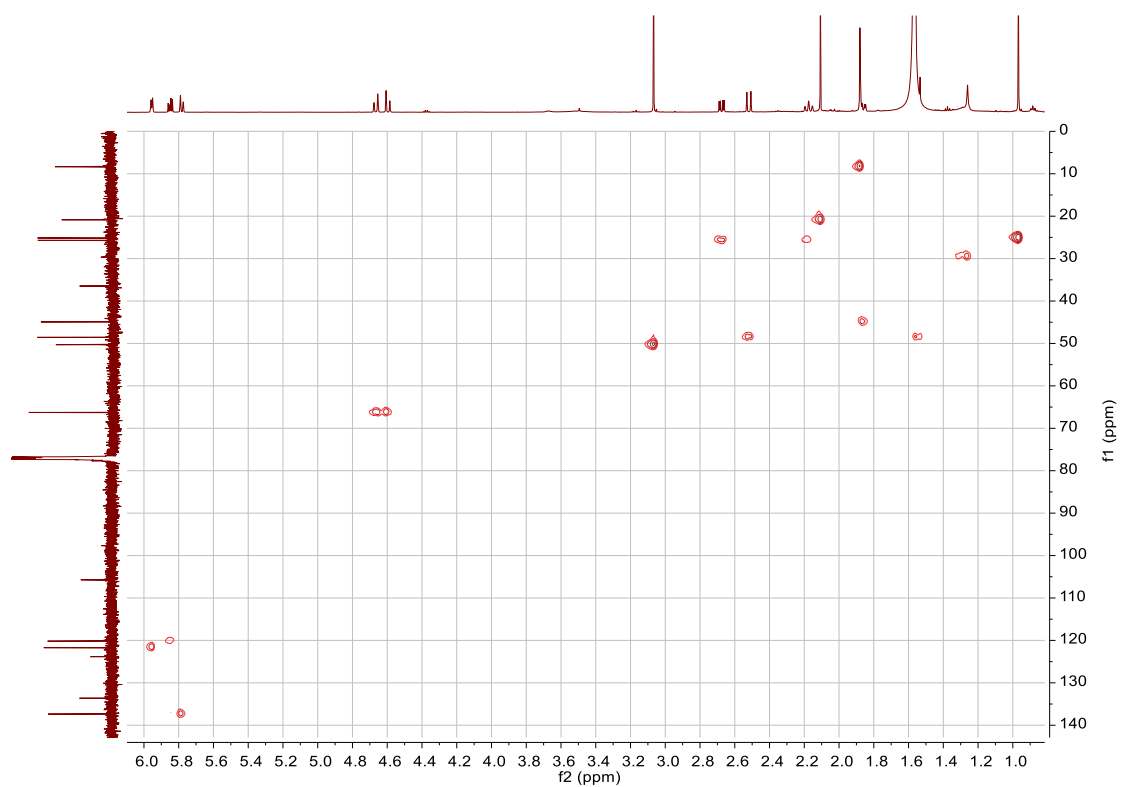

**Figure S25** HSQC spectrum of **3**

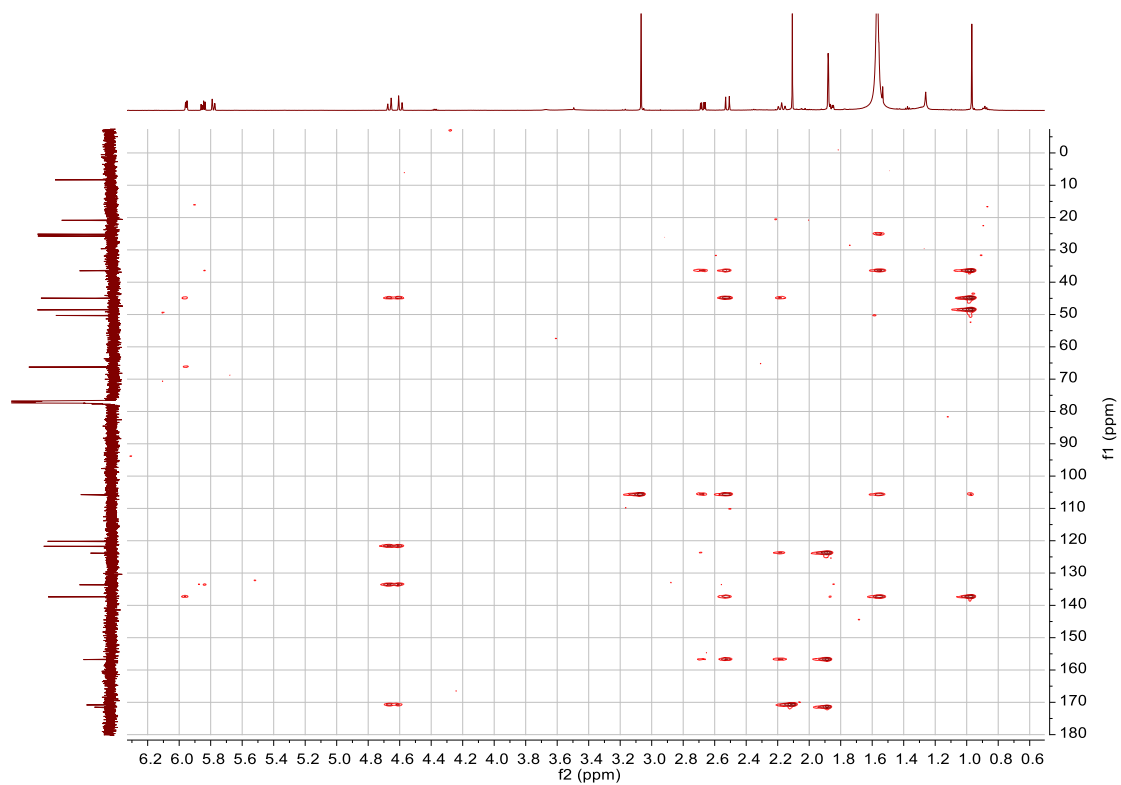

**Figure S26** HMBC spectrum of **3**

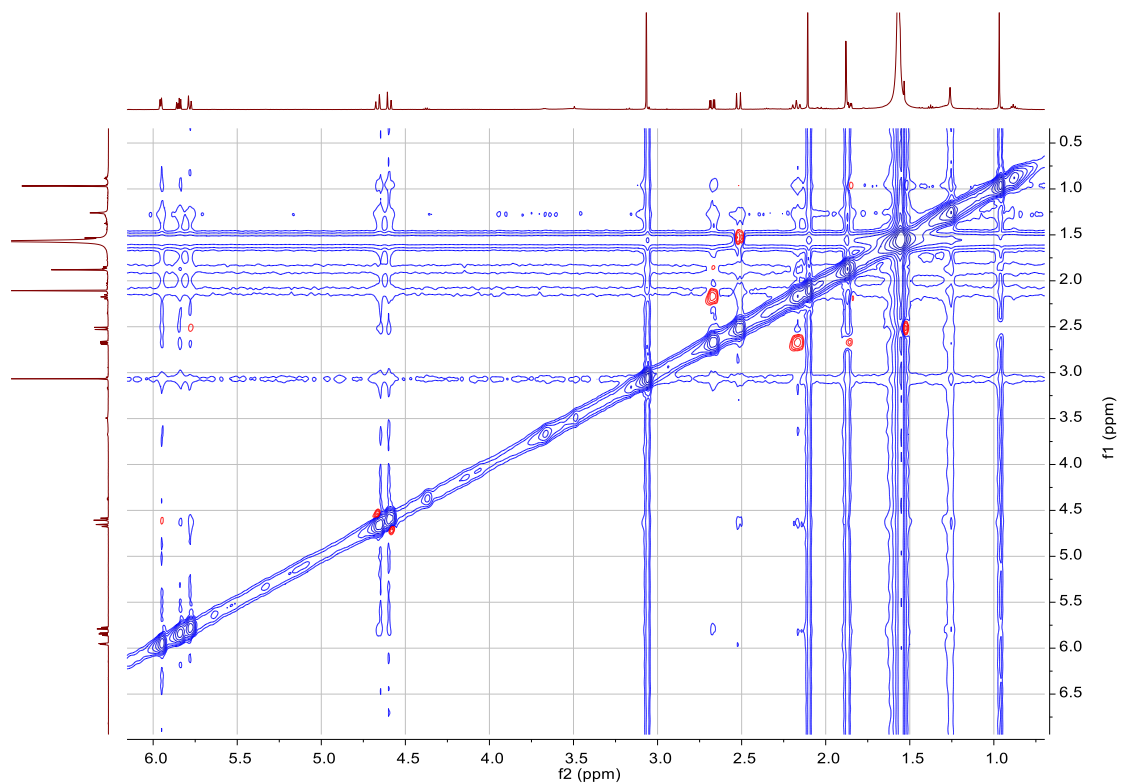

**Figure S27** NOESY spectrum of **3**

## Mass Spectrum SmartFormula Report

### Analysis Info

Analysis Name D:\0819\CIMR.d  
Method tune\_wide\_pos\_20220422.m  
Sample Name CI-M  
Comment Positive

8/23/2022 11:57:34 AM  
Operator: YU HSIAO-CHING  
Instrument: BRUKER micrOTOF-Q

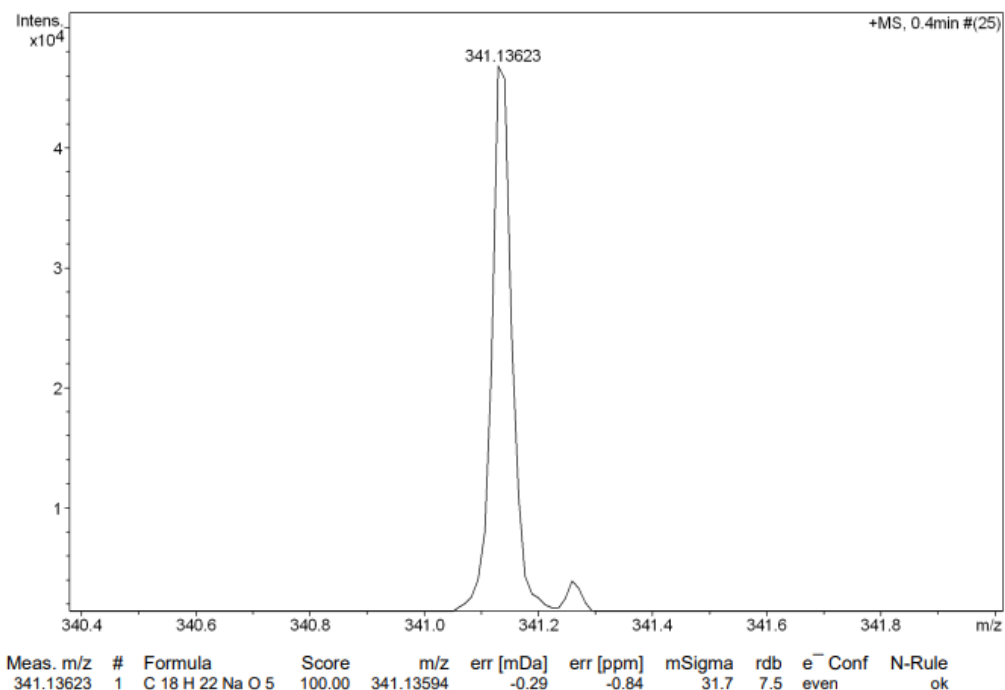

**Figure S28** HRESIMS spectrum of **3**

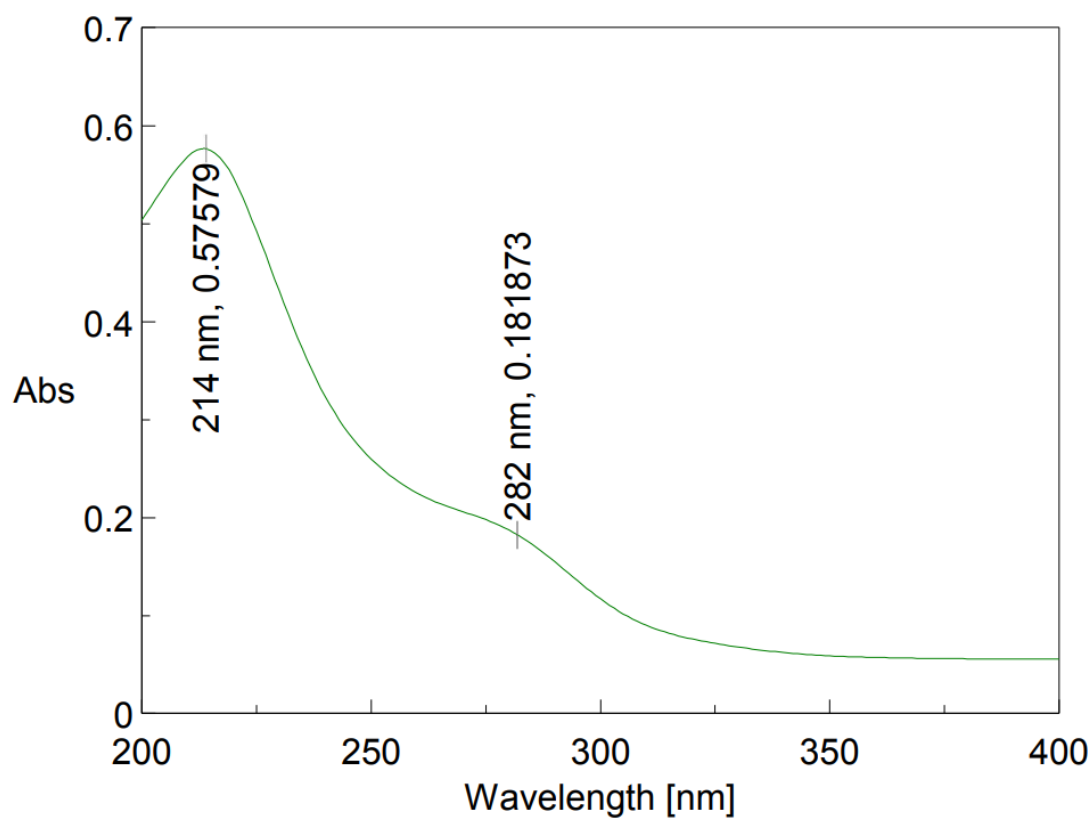

**Figure S29** UV spectrum of **3**

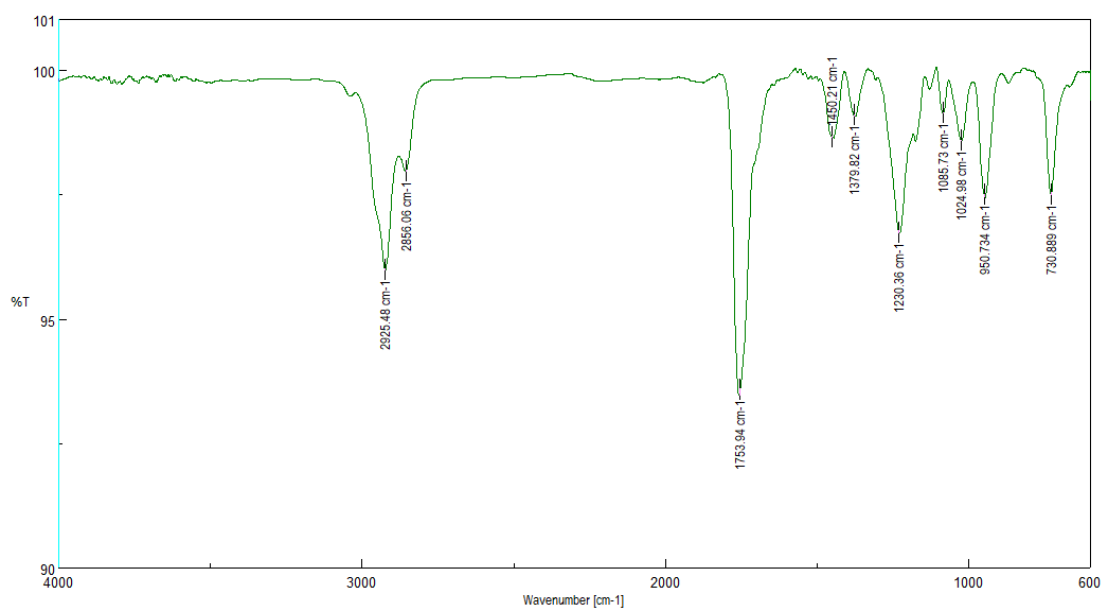

**Figure S30** IR spectrum of **3**

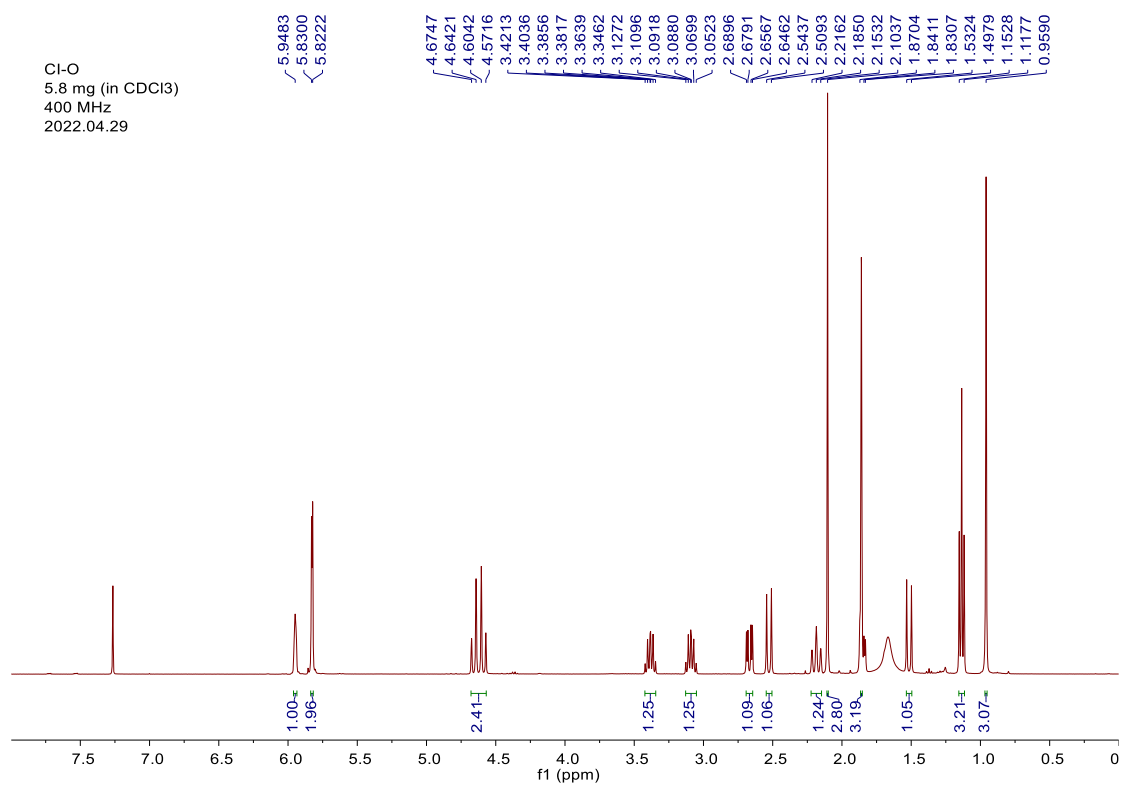

Figure S31 <sup>1</sup>H NMR spectrum of **4** (400 MHz, CDCl<sub>3</sub>)

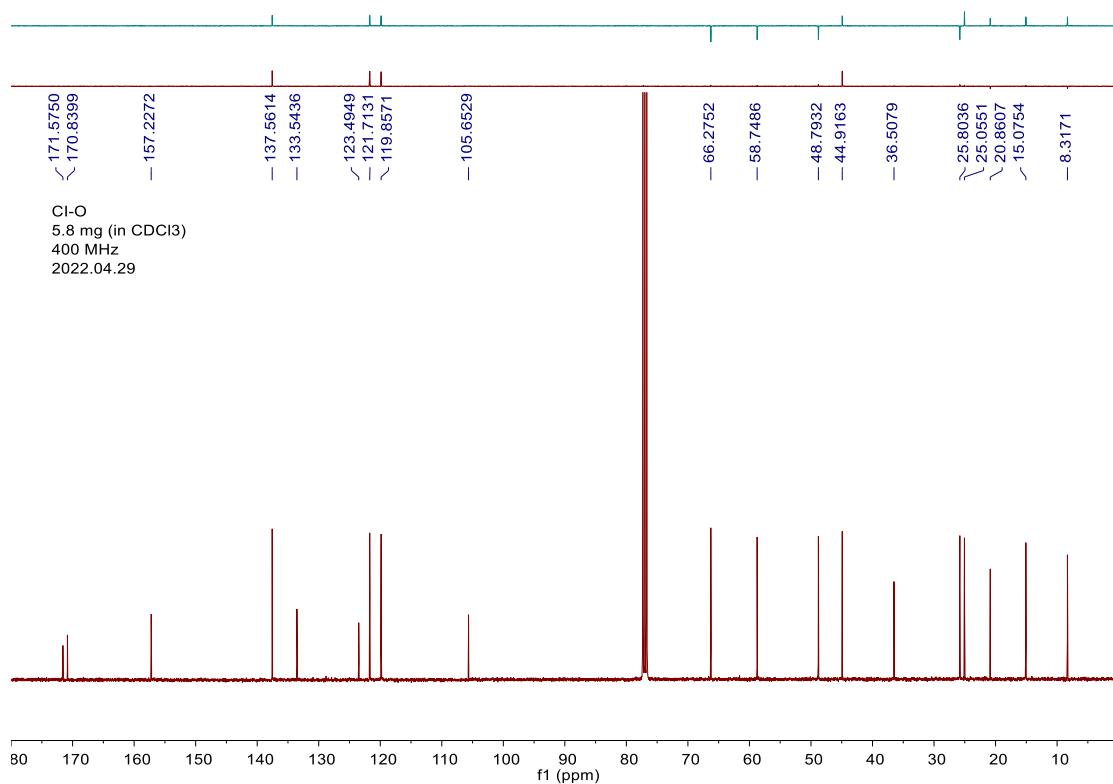

Figure S32 <sup>13</sup>C NMR spectrum of **4** (100 MHz, CDCl<sub>3</sub>)

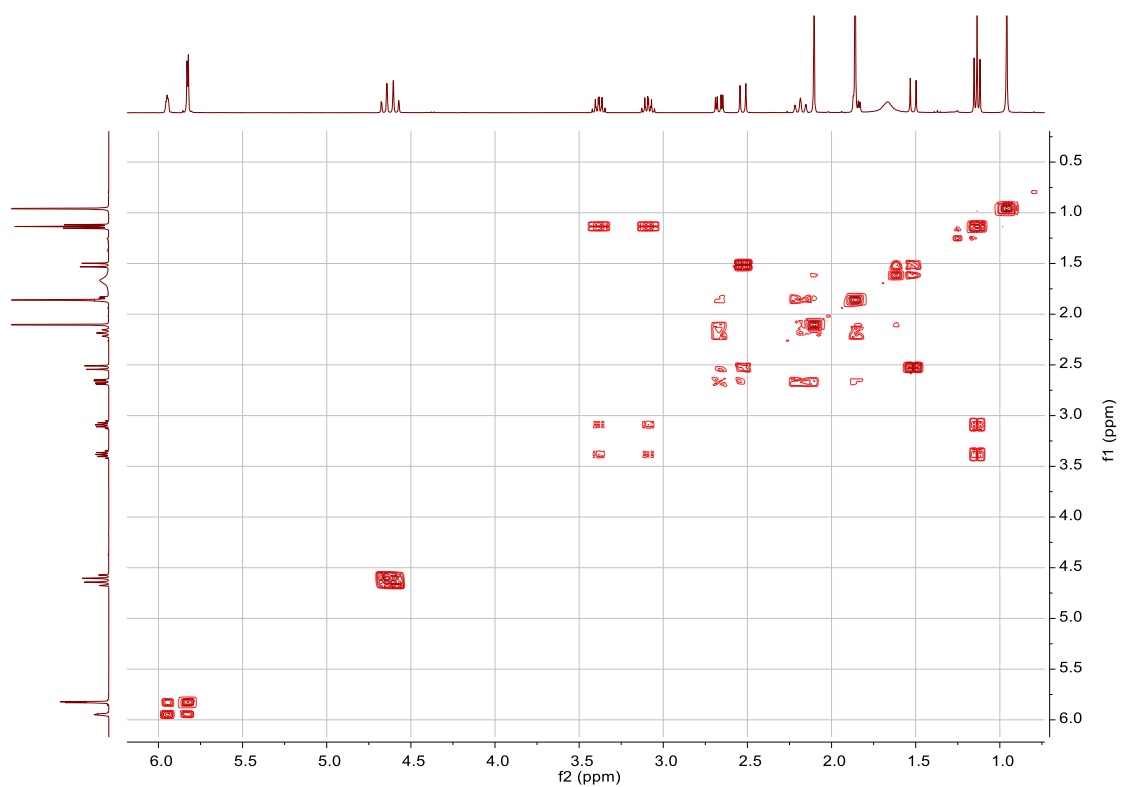

**Figure S33** COSY spectrum of **4**

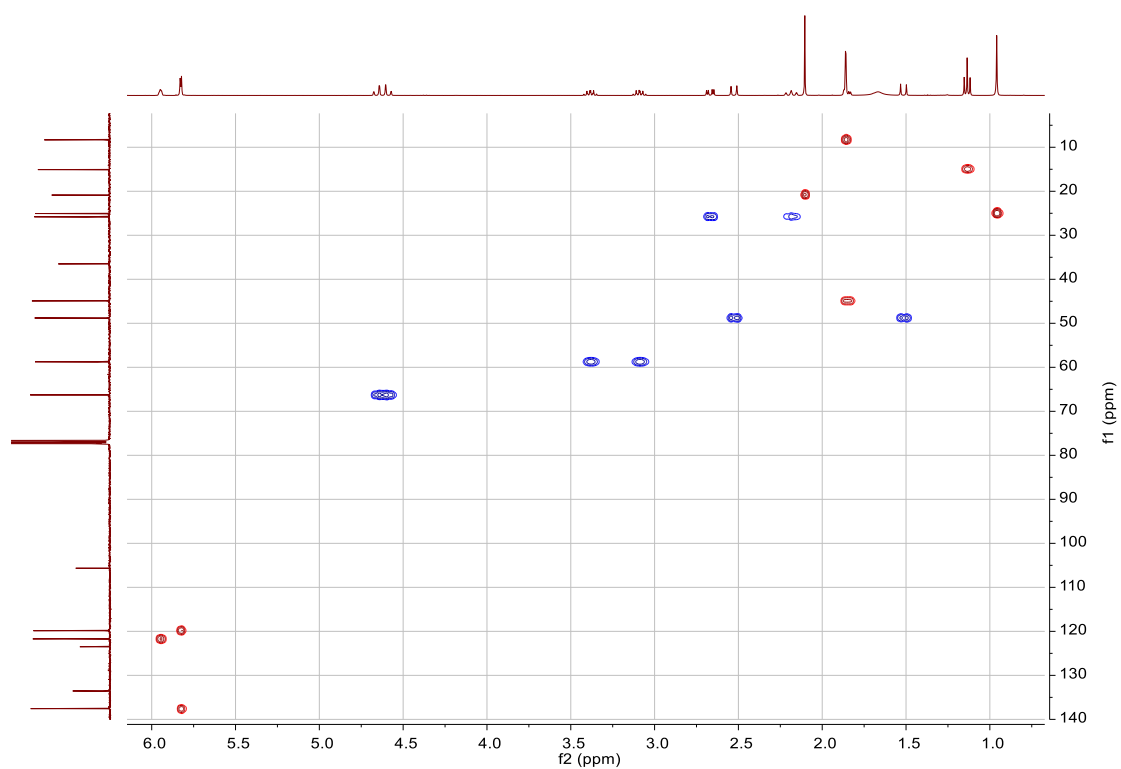

**Figure S34** HSQC spectrum of **4**

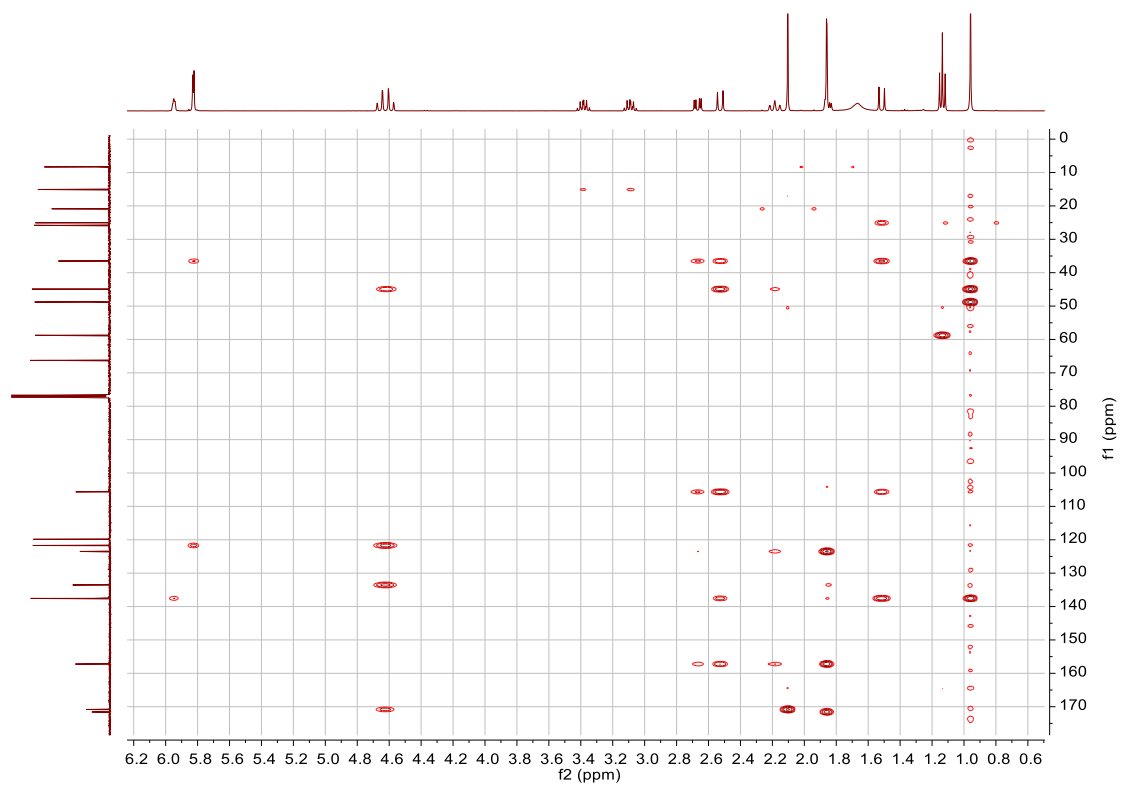

**Figure S35** HMBC spectrum of **4**

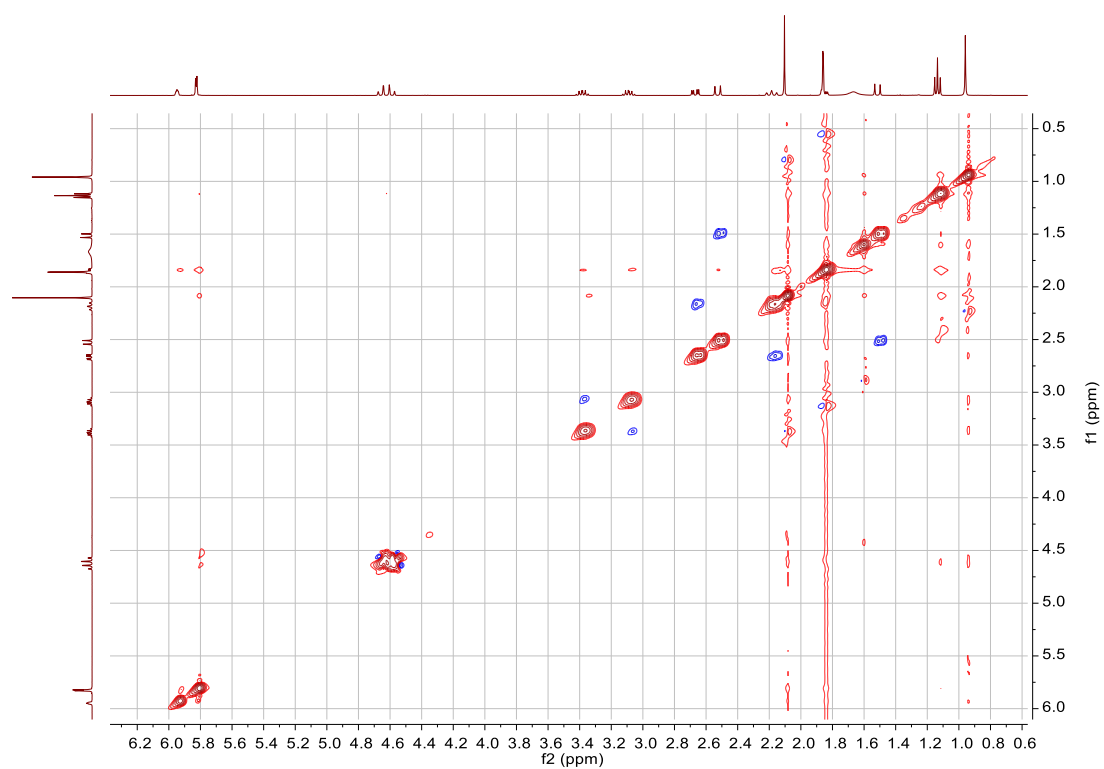

**Figure S36** NOESY spectrum of **4**

## Mass Spectrum SmartFormula Report

### Analysis Info

Analysis Name D:\0819\CIOR1.d  
Method tune\_wide\_pos\_20220422.m  
Sample Name CI-O  
Comment Positive

8/23/2022 11:59:58 AM  
Operator: YU HSIAO-CHING  
Instrument: BRUKER microTOF-Q

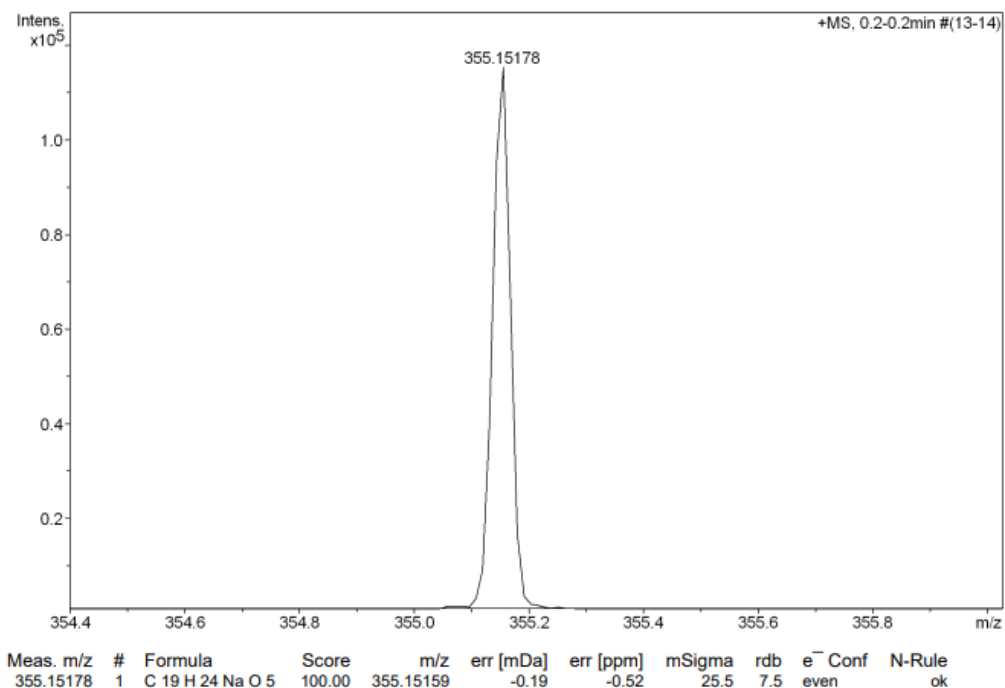

Figure S37 HRESIMS spectrum of **4**

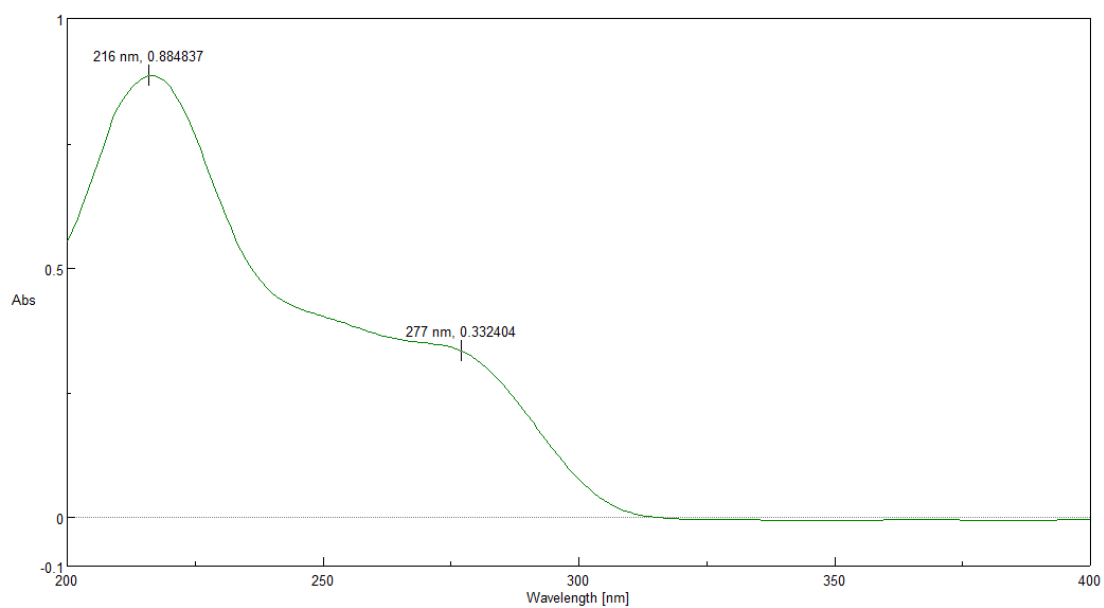

**Figure S38 UV spectrum of 4**

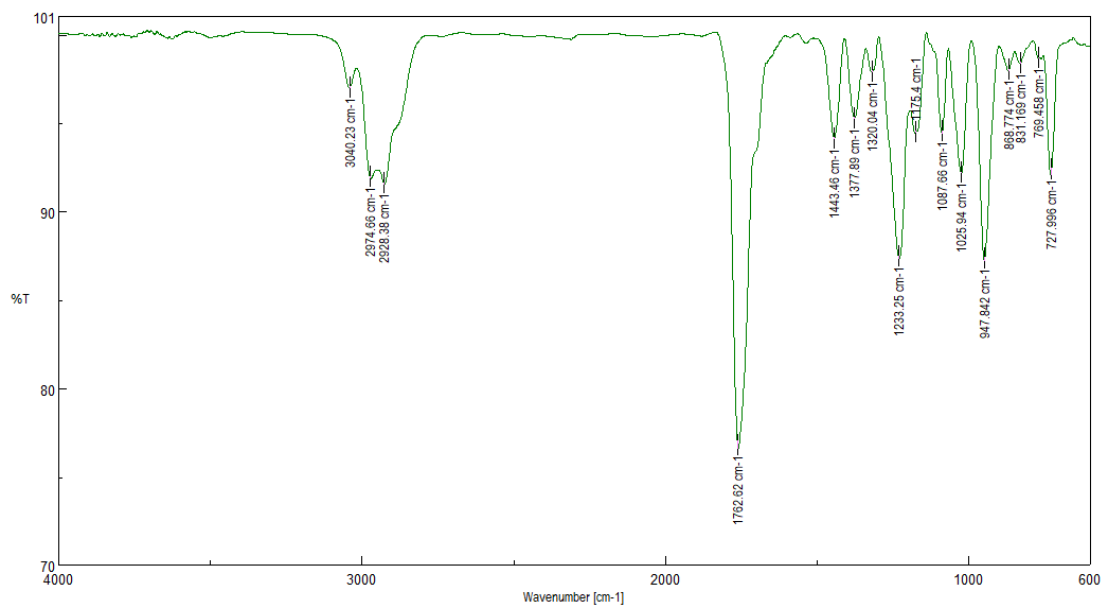

**Figure S39 IR spectrum of 4**

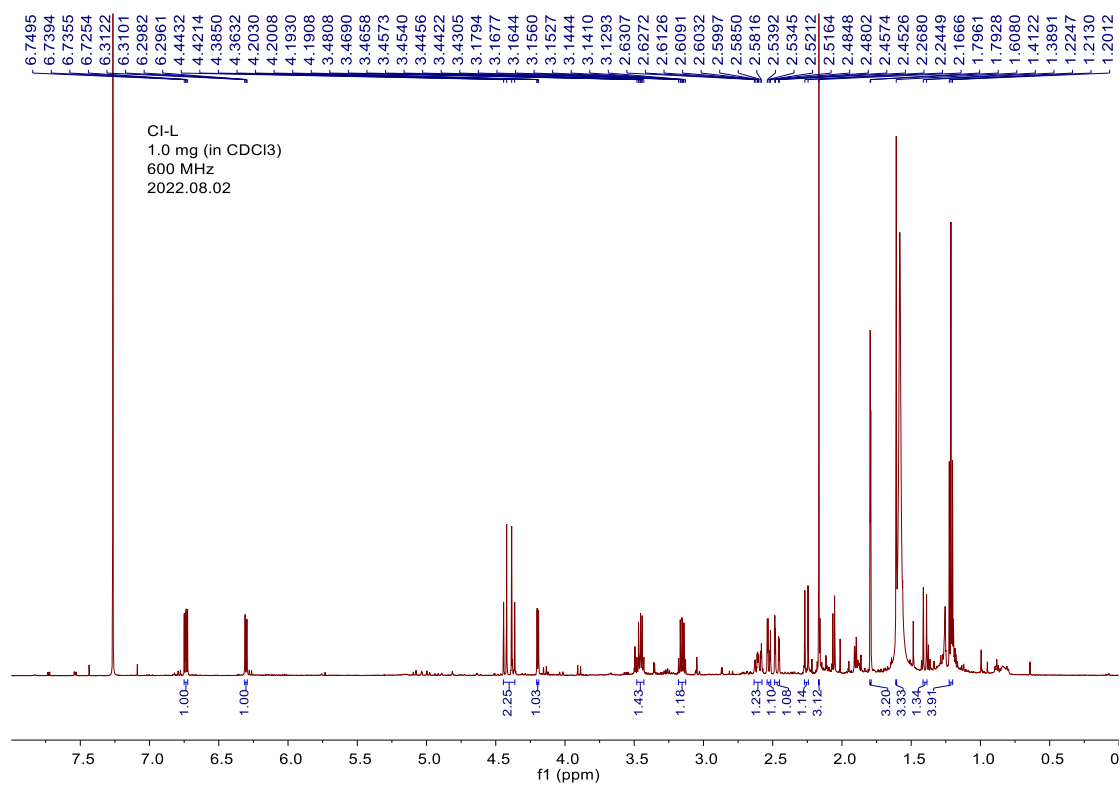

Figure S40 <sup>1</sup>H NMR spectrum of **5** (600 MHz, CDCl<sub>3</sub>)

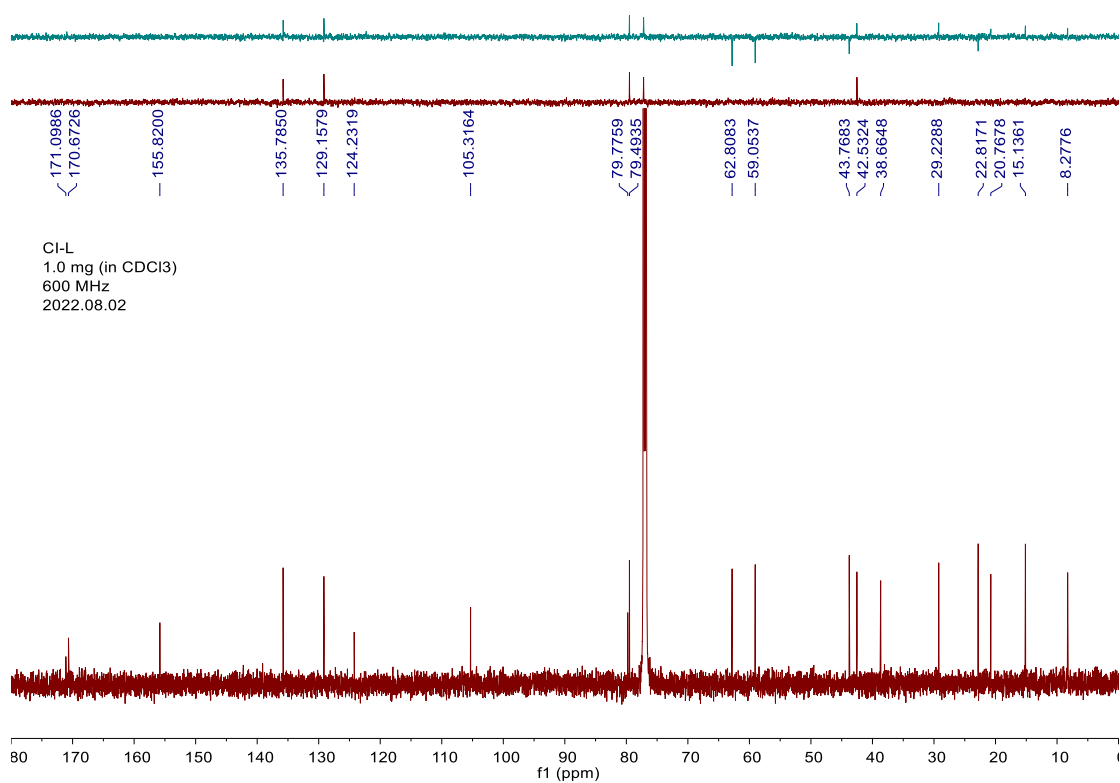

Figure S41 <sup>13</sup>C NMR spectrum of **5** (125 MHz, CDCl<sub>3</sub>)

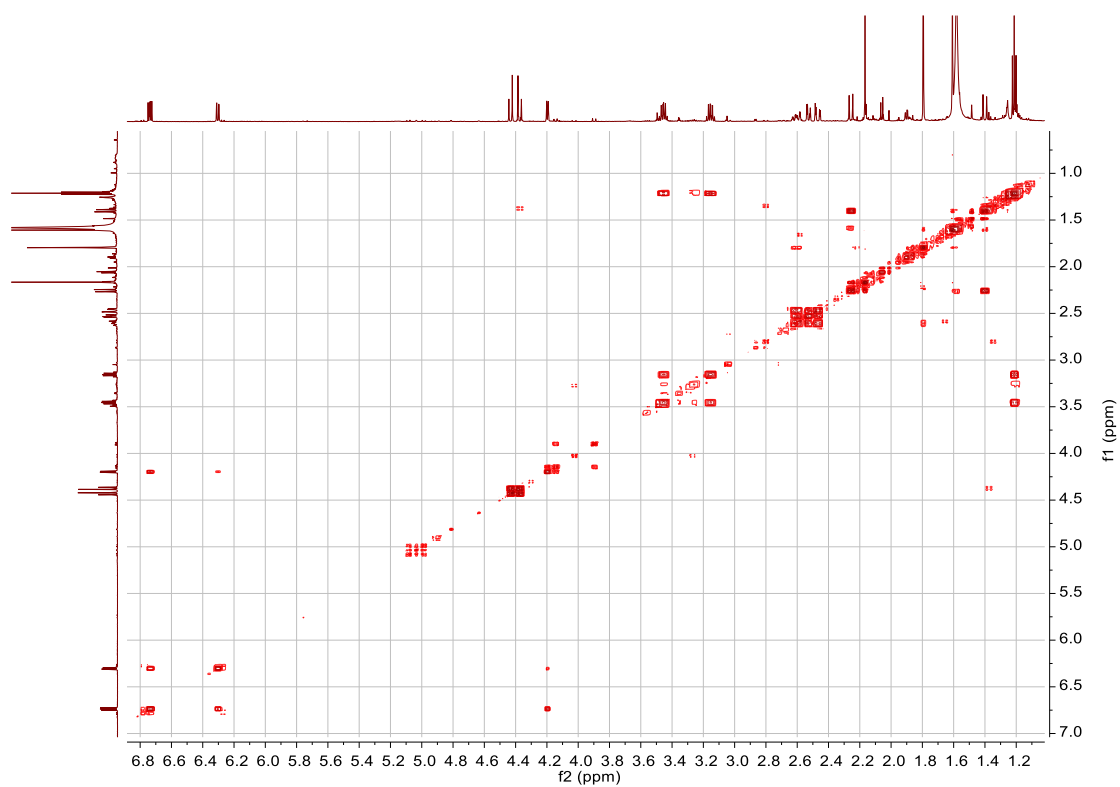

**Figure S42** COSY spectrum of **5**

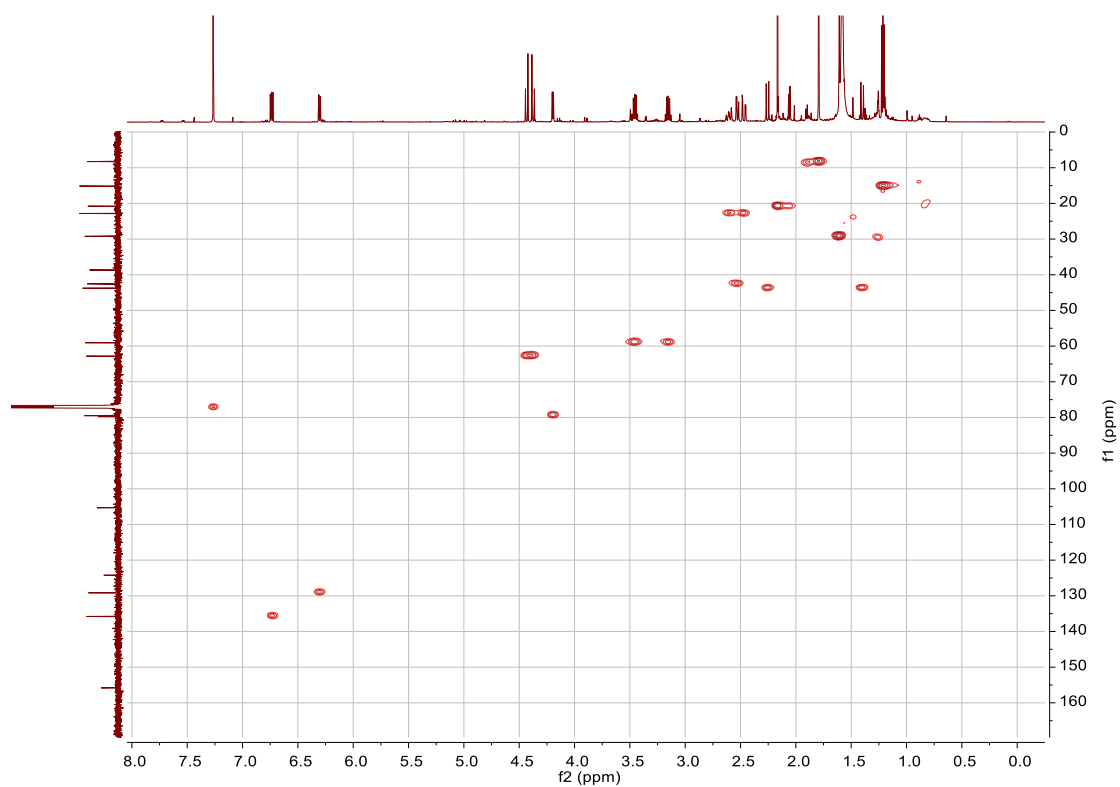

**Figure S43** HSQC spectrum of **5**

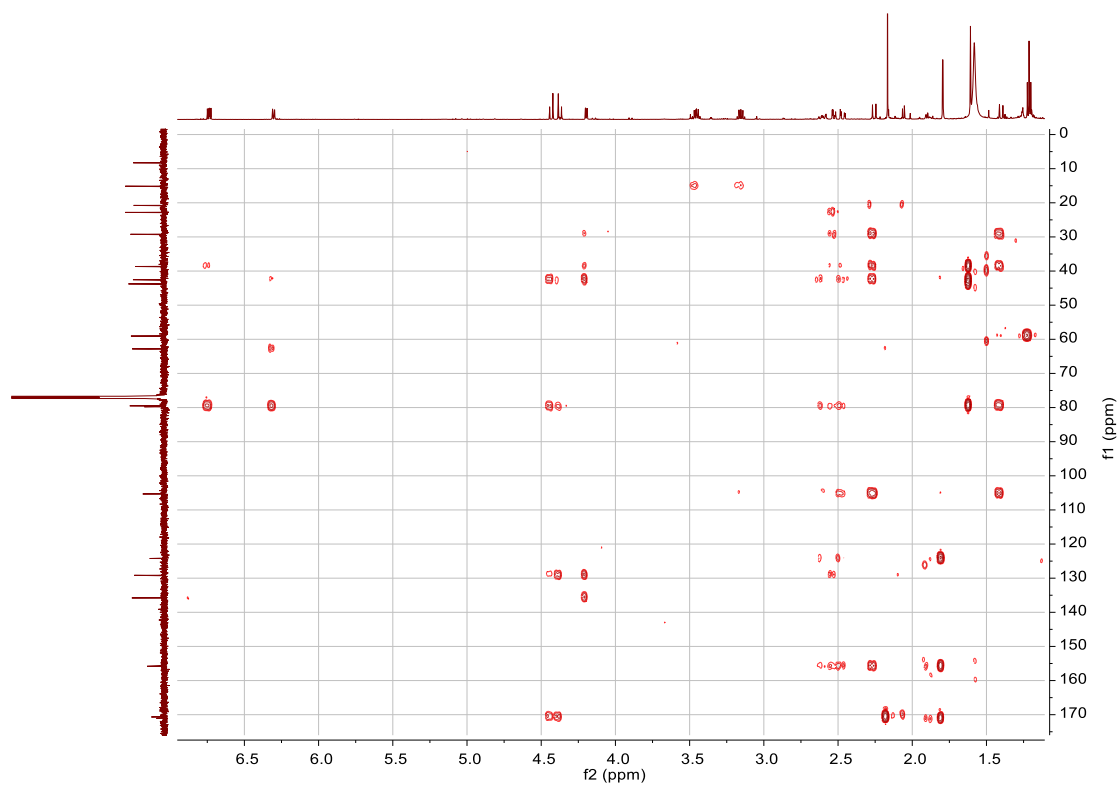

**Figure S44** HMBC spectrum of **5**

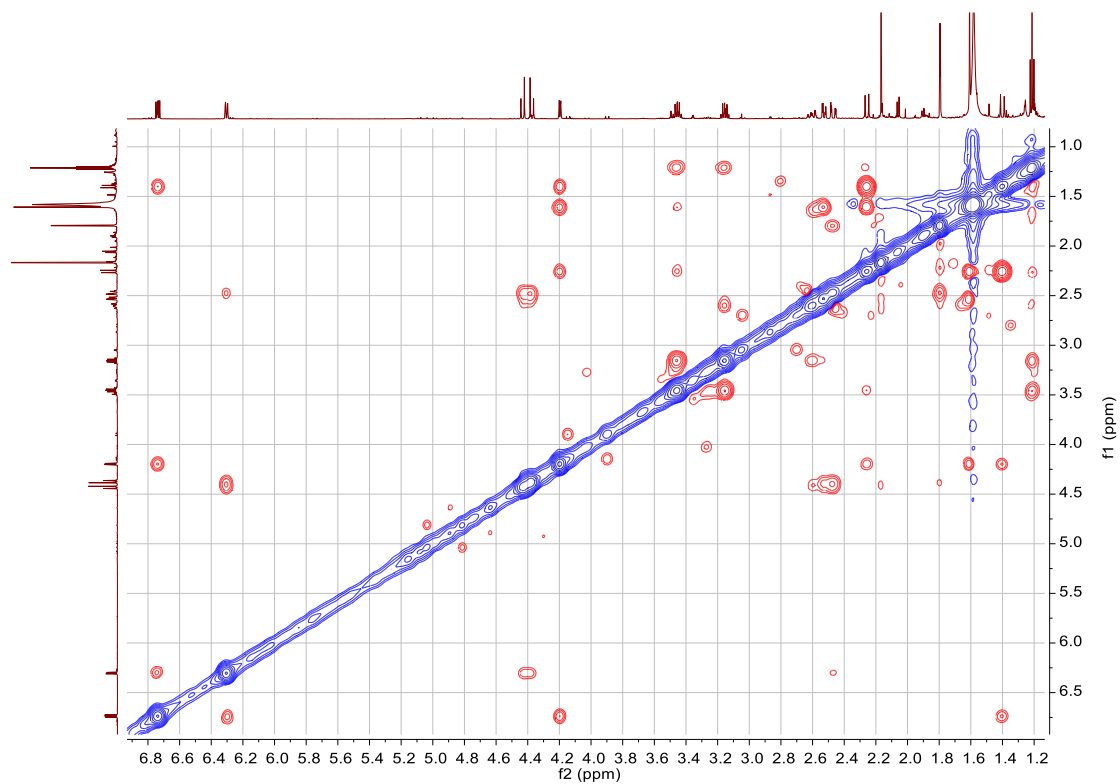

**Figure S45** NOESY spectrum of **5**

## Mass Spectrum SmartFormula Report

### Analysis Info

Analysis Name D:\0819\CIMR.d  
Method tune\_wide\_pos\_20220422.m  
Sample Name CI-M  
Comment Positive

8/23/2022 11:57:34 AM  
Operator: YU HSIAO-CHING  
Instrument: BRUKER micrOTOF-Q

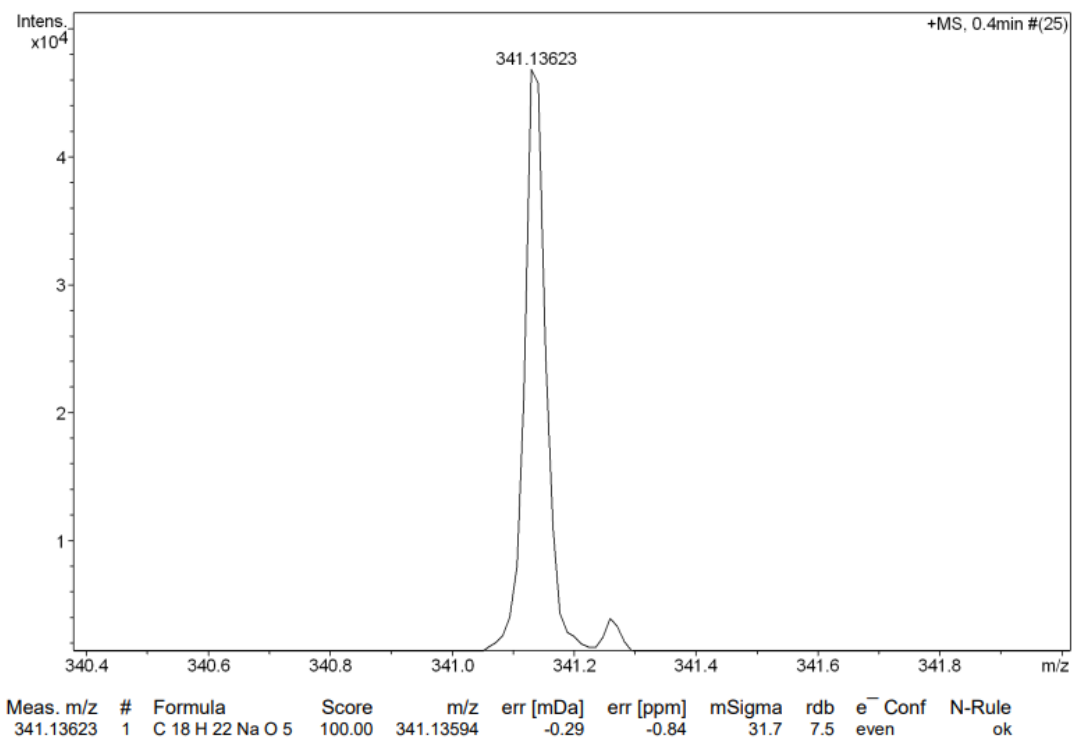

**Figure S46** HRESIMS spectrum of **5**

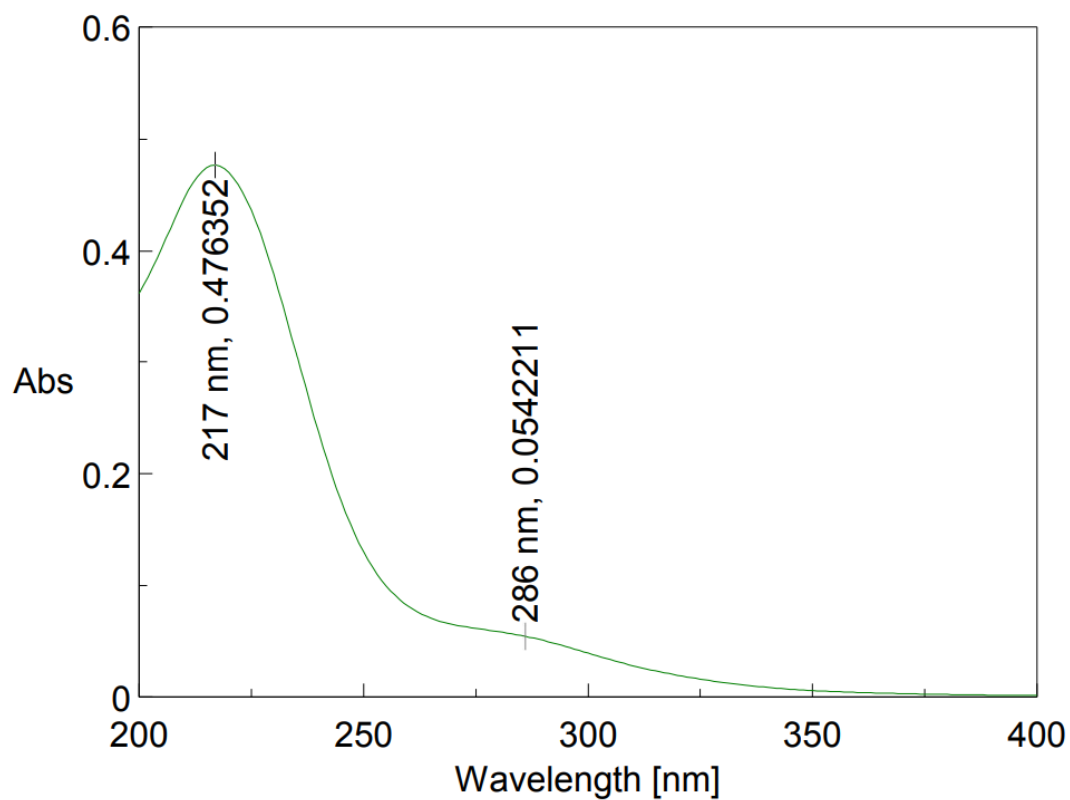

Figure S47 UV spectrum of **5**

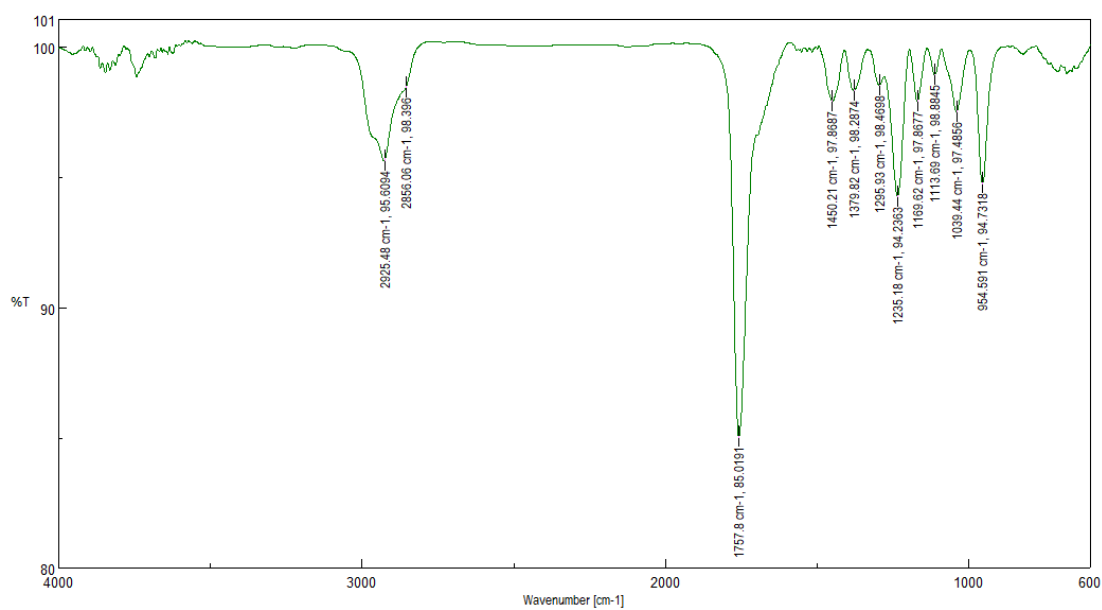

Figure S48 IR spectrum of **5**

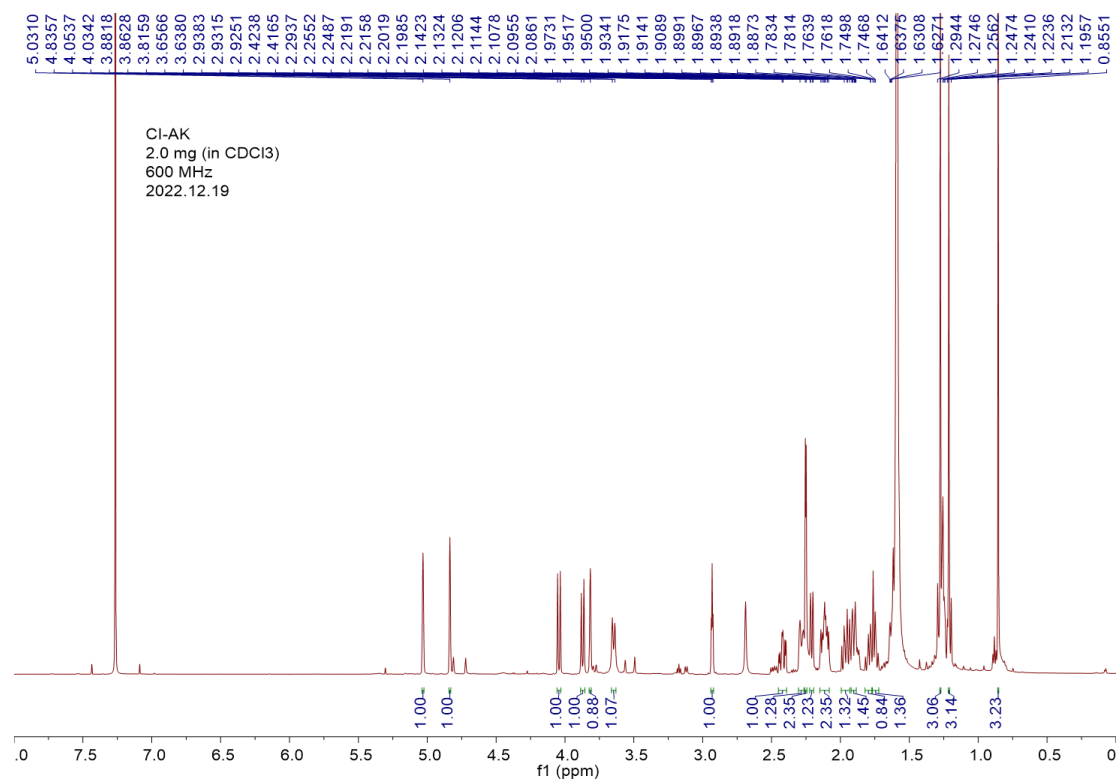

Figure S49 <sup>1</sup>H NMR spectrum of **6** (600 MHz, CDCl<sub>3</sub>)

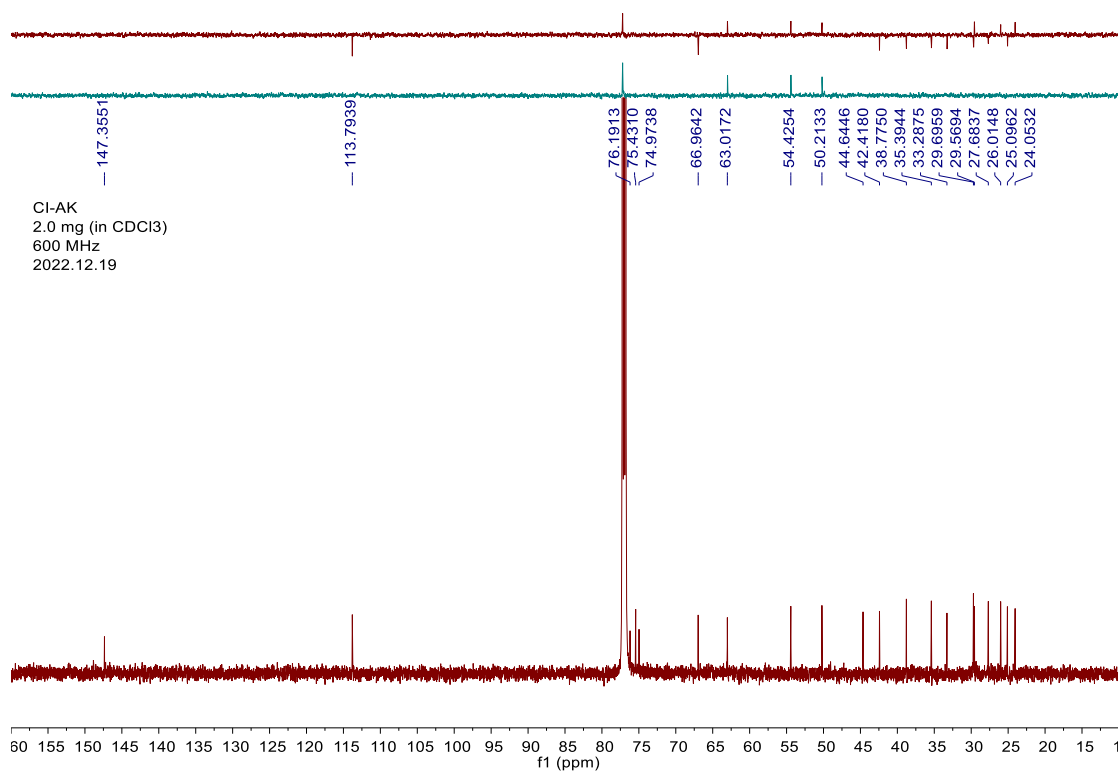

Figure S50 <sup>13</sup>C NMR spectrum of **6** (125 MHz, CDCl<sub>3</sub>)

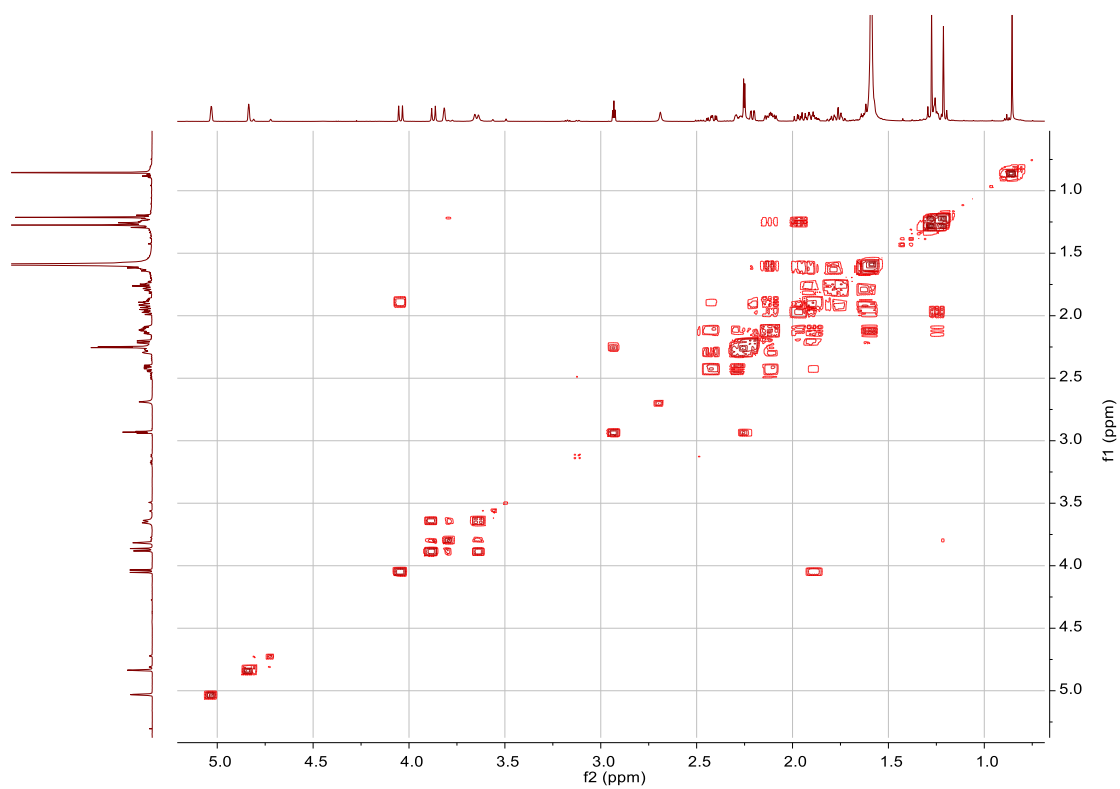

**Figure S51** COSY spectrum of **6**

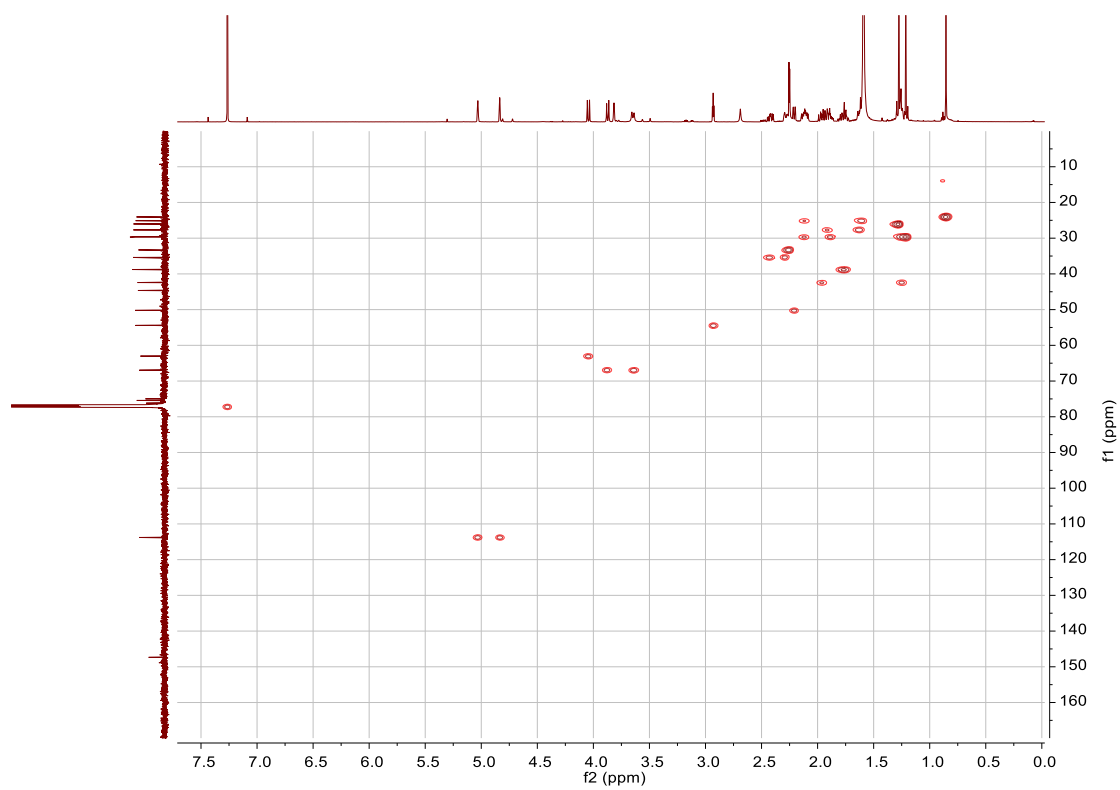

**Figure S52** HSQC spectrum of **6**

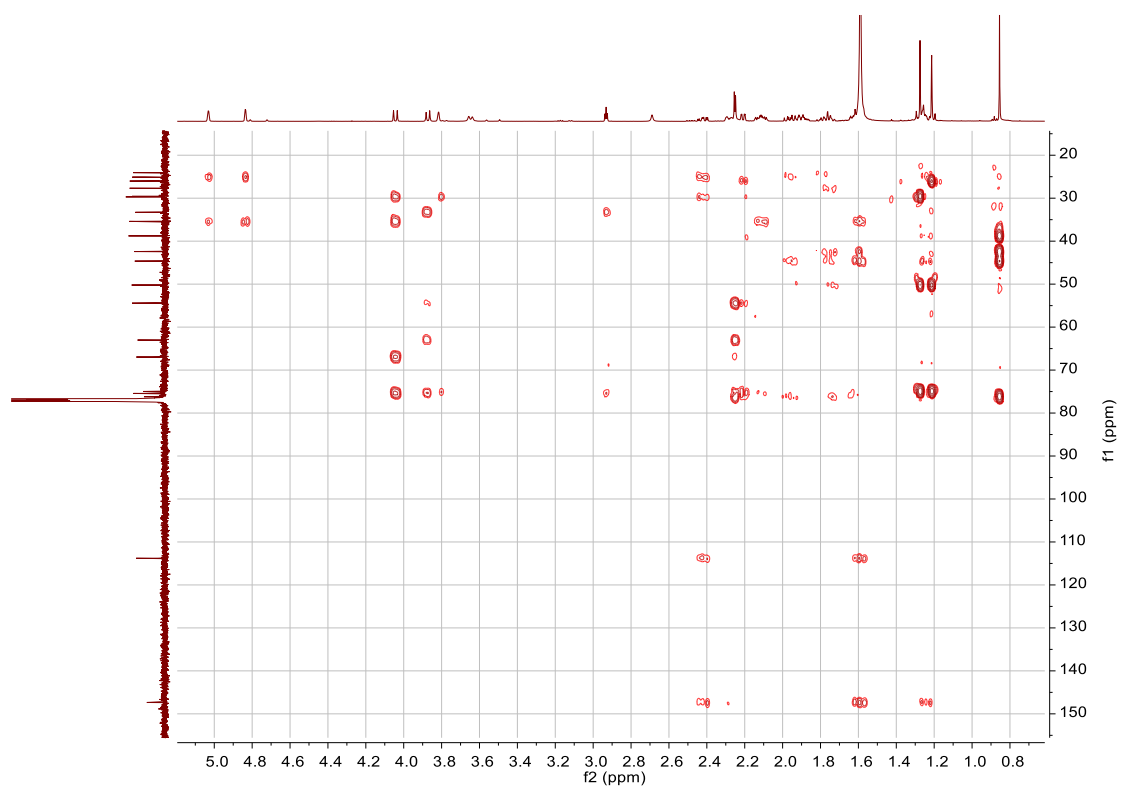

**Figure S53** HMBC spectrum of **6**

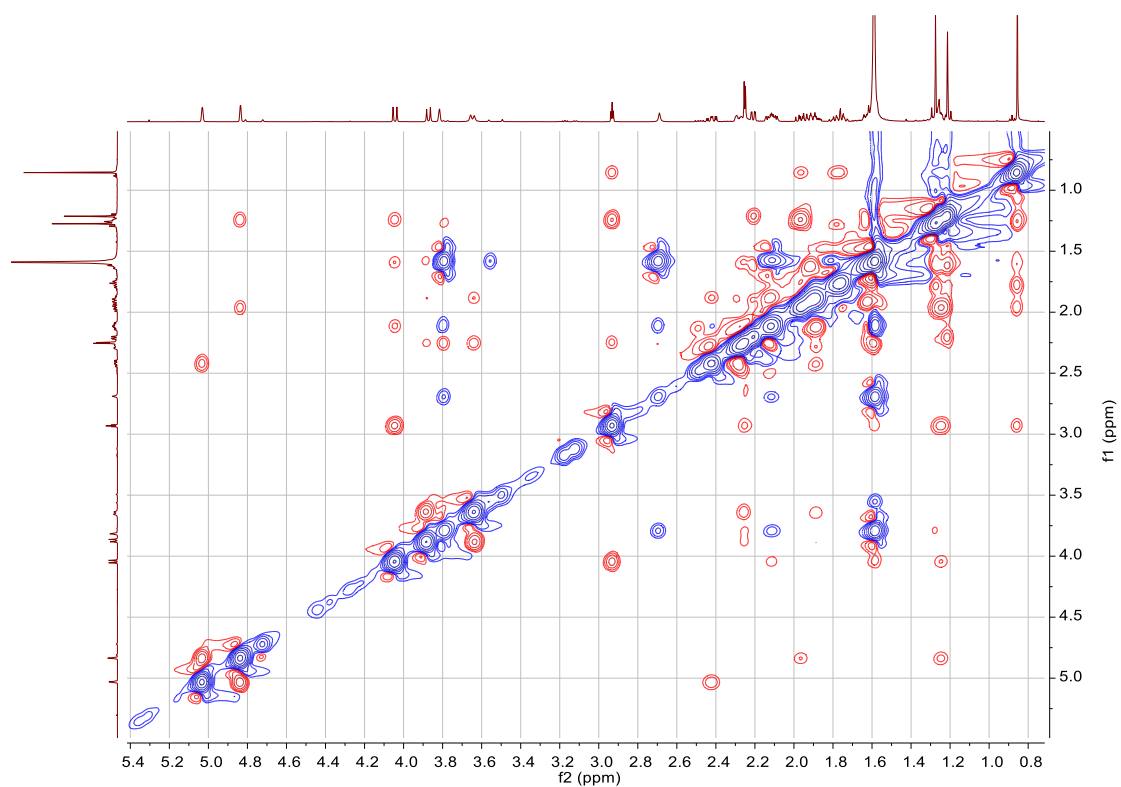

**Figure S54** NOESY spectrum of **6**

## Mass Spectrum SmartFormula Report

### Analysis Info

Analysis Name D:\1223\CIAKR.d  
Method tune\_wide\_pos\_20220422.m  
Sample Name CI-AK  
Comment ESI Positive

12/26/2022 11:30:15 AM  
Operator: YU HSIAO-CHING  
Instrument: BRUKER micrOTOF-Q

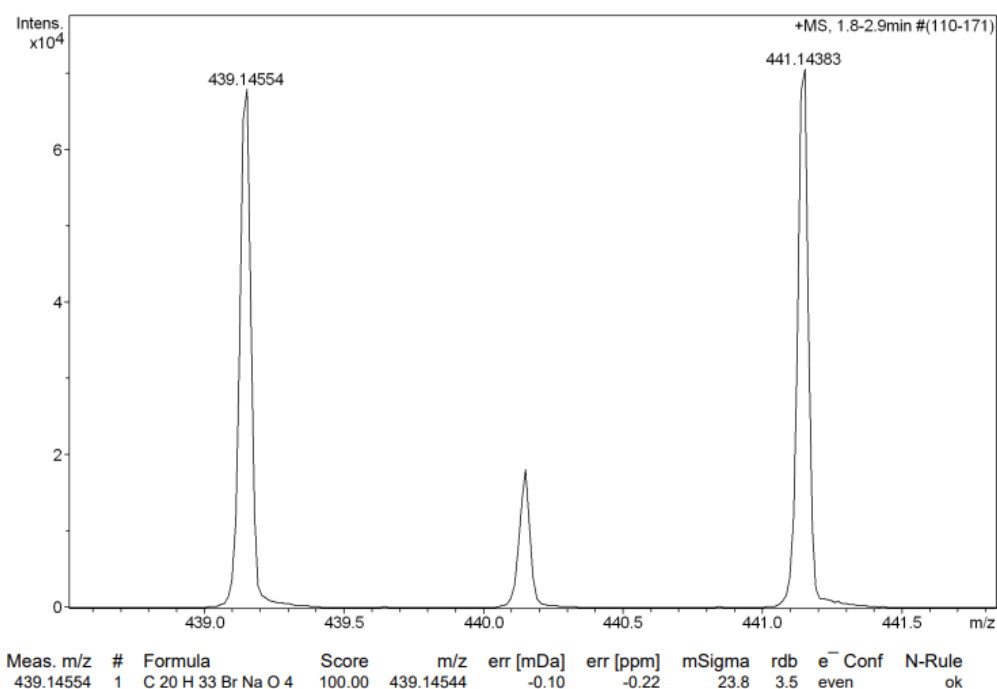

Figure S55 HRESIMS spectrum of **6**

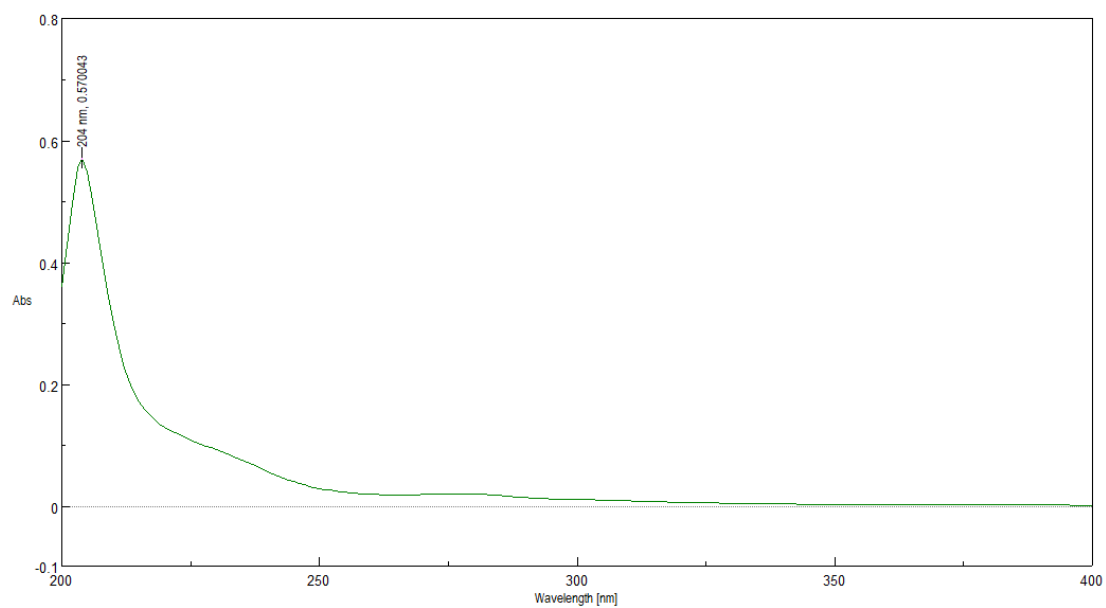

**Figure S56 UV spectrum of 6**

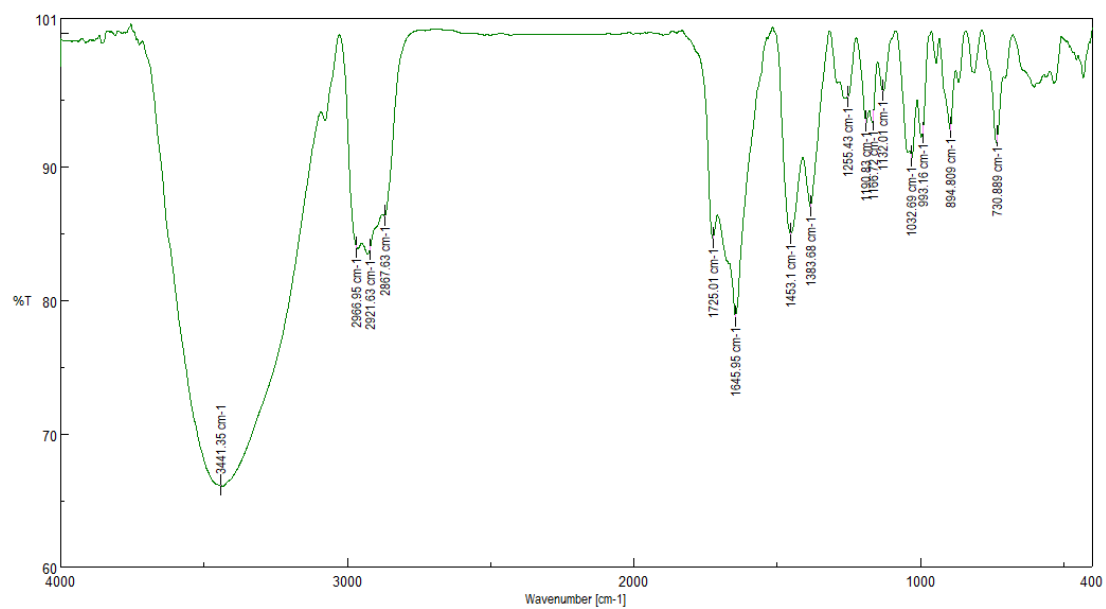

**Figure S57 IR spectrum of 6**

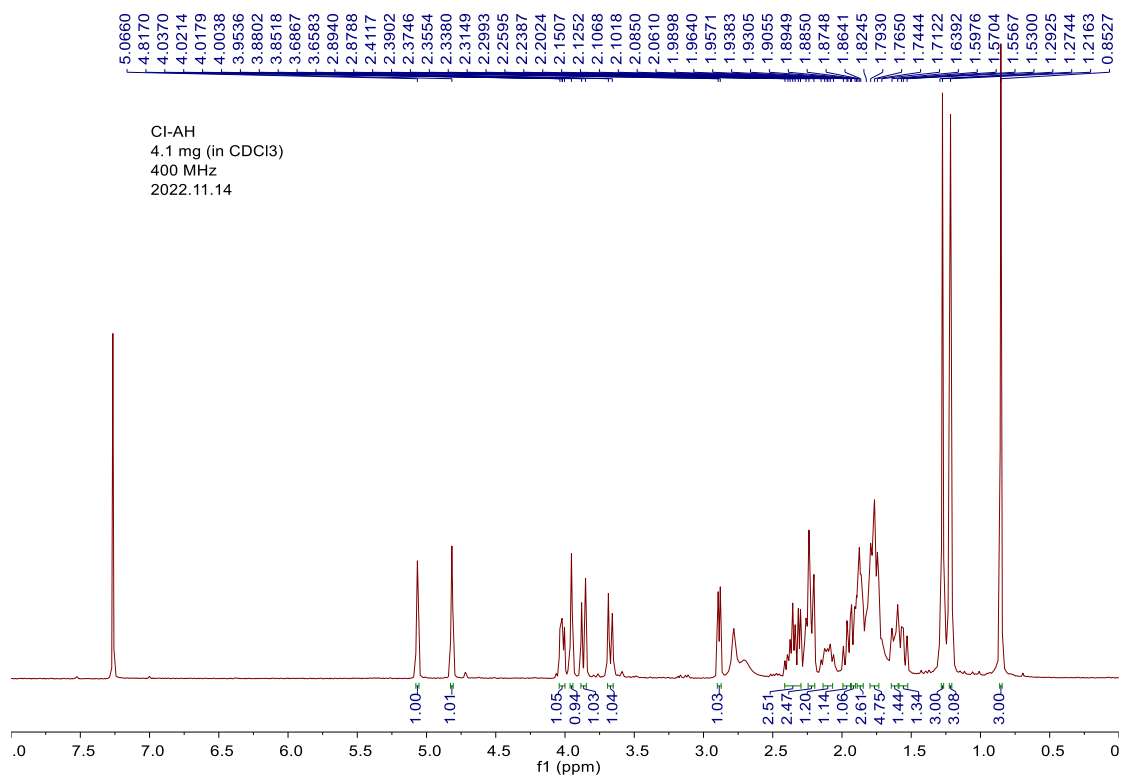

Figure S58 <sup>1</sup>H NMR spectrum of **7** (400 MHz, CDCl<sub>3</sub>)

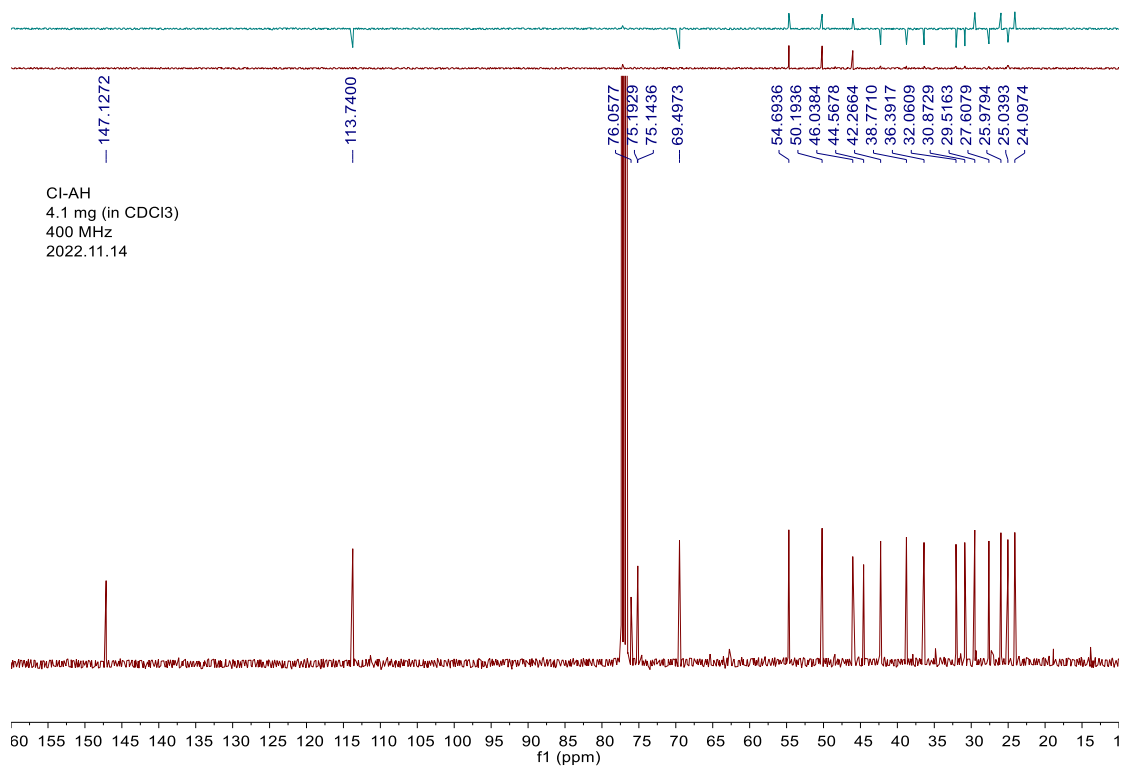

Figure S59 <sup>13</sup>C NMR spectrum of **7** (100 MHz, CDCl<sub>3</sub>)

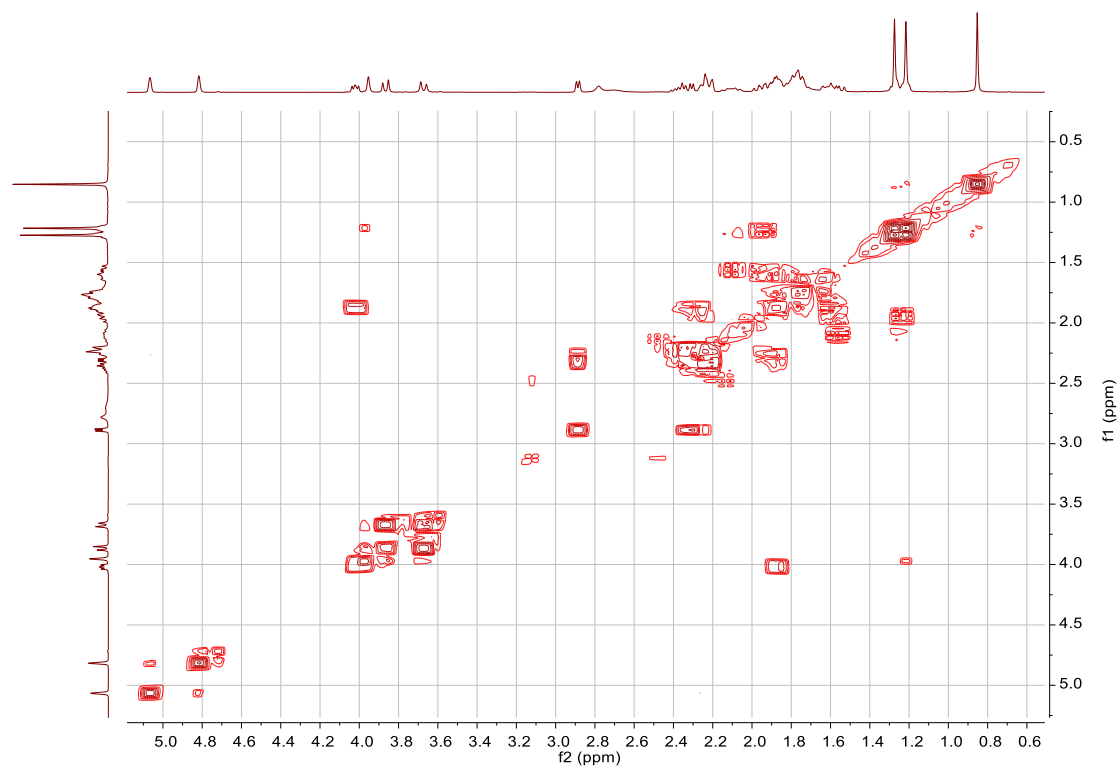

**Figure S60** COSY spectrum of **7**

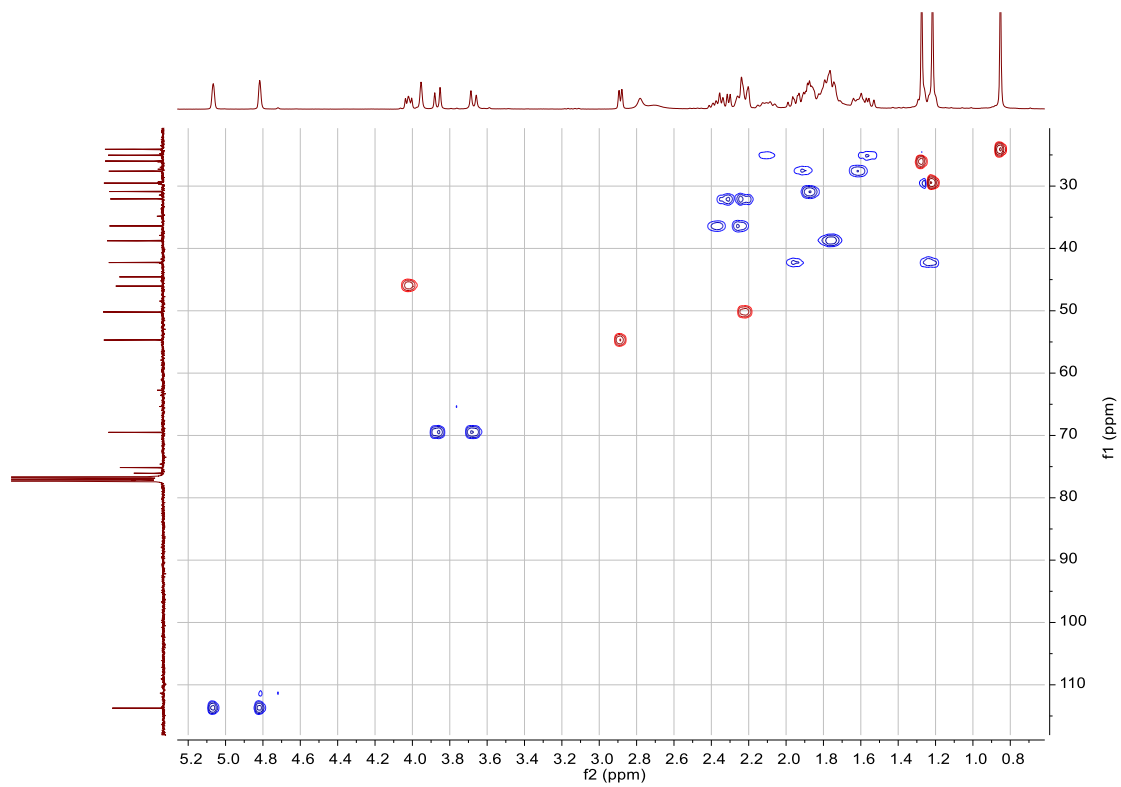

**Figure S61** HSQC spectrum of **7**

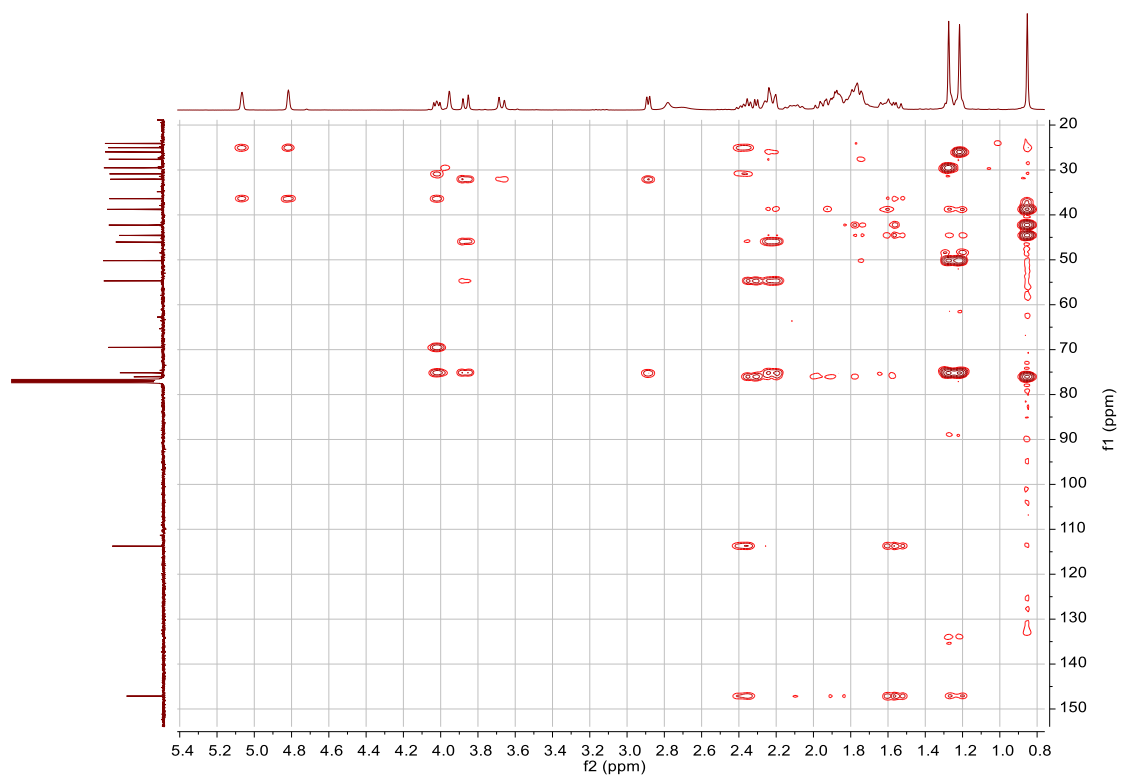

**Figure S62** HMBC spectrum of **7**

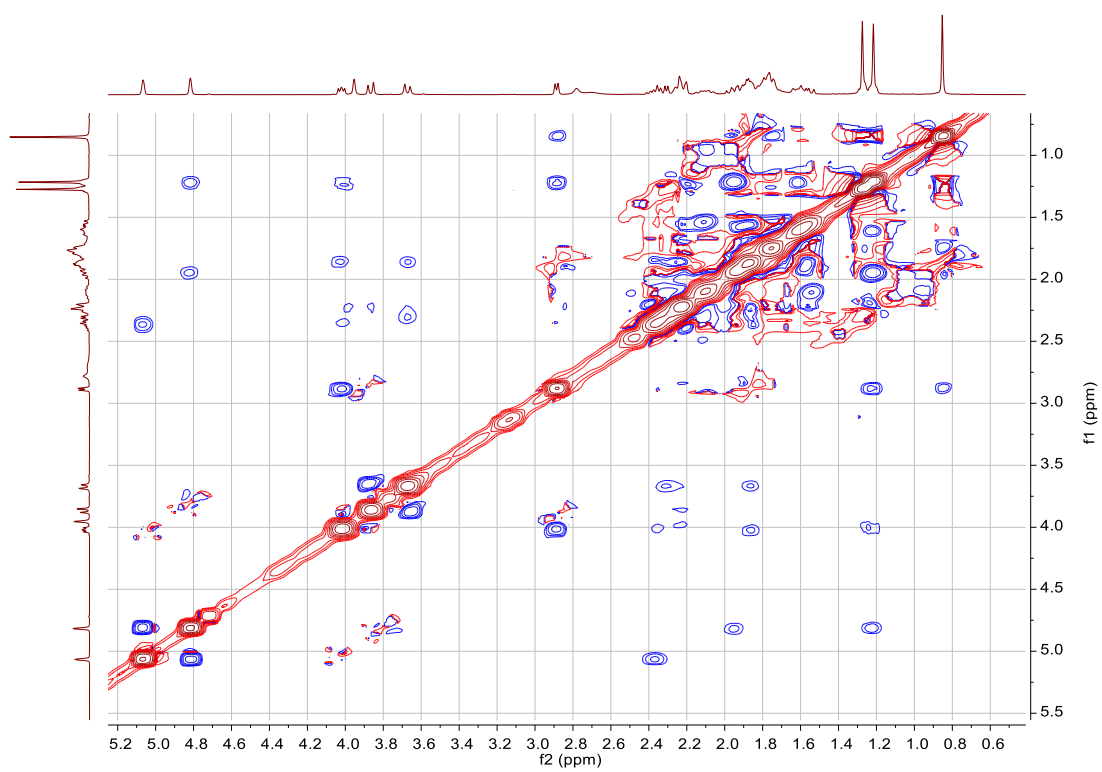

**Figure S63** NOESY spectrum of **7**

## Mass Spectrum SmartFormula Report

### Analysis Info

Analysis Name D:\1219\CIHR2.d  
Method tune\_wide\_pos\_20220422.m  
Sample Name CI-AH  
Comment ESI Positive

12/20/2022 10:41:26 AM  
Operator: YU HSIAO-CHING  
Instrument: BRUKER micrOTOF-Q

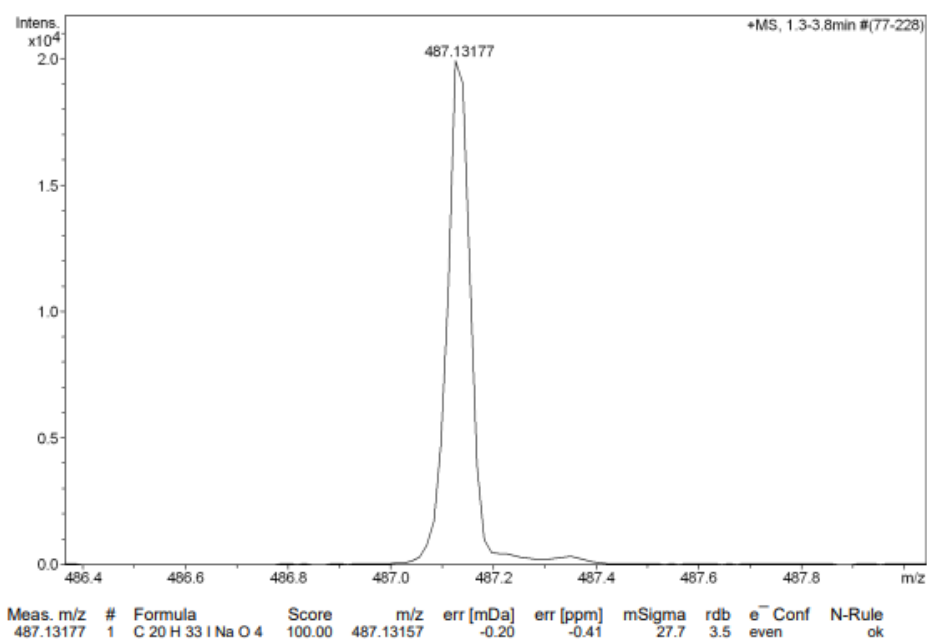

Figure S64 HRESIMS spectrum of **7**

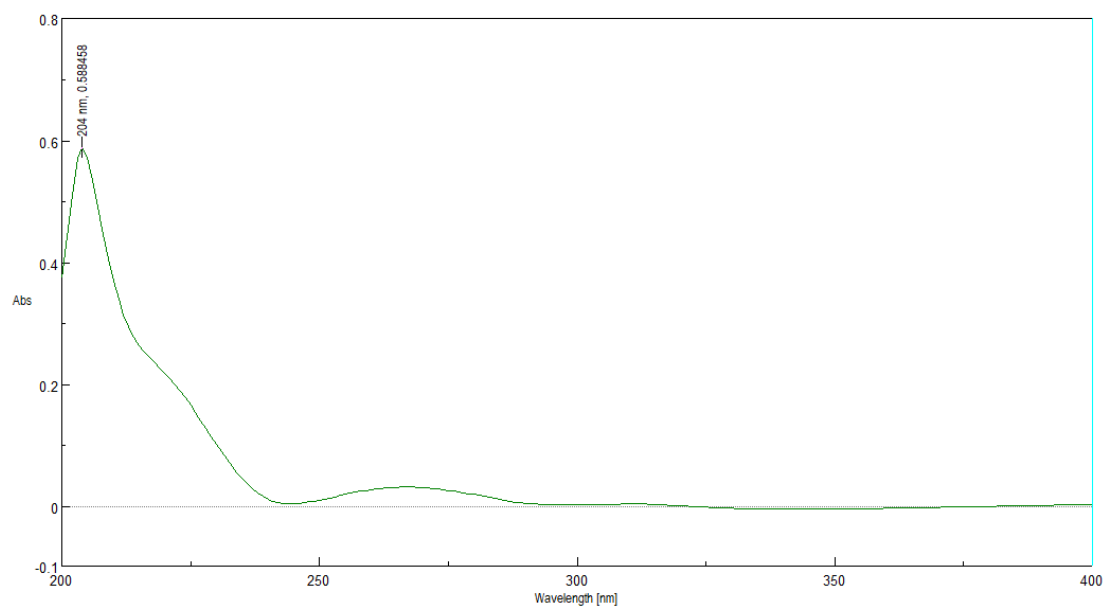

**Figure S65** UV spectrum of **7**

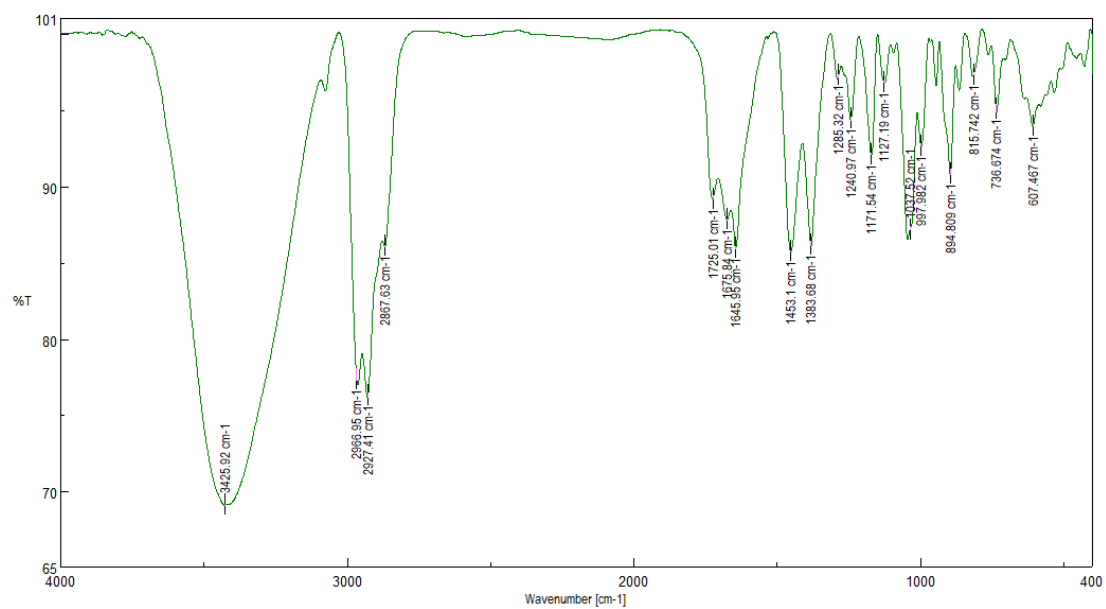

**Figure S66** IR spectrum of **7**

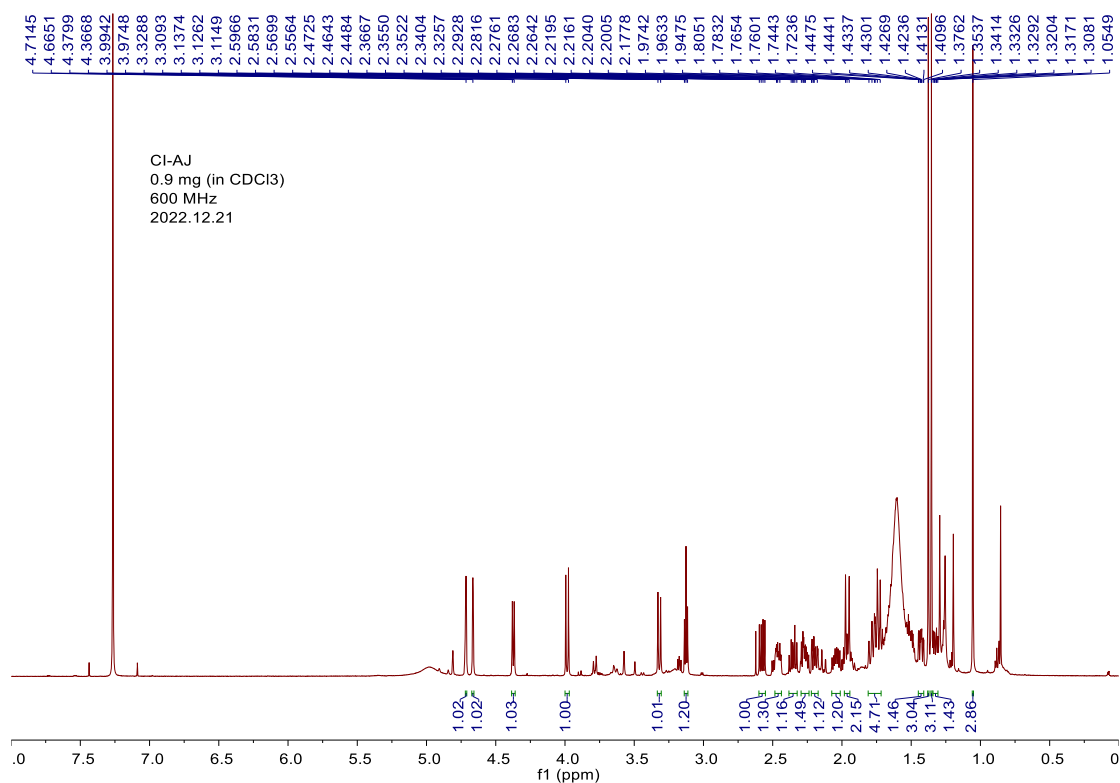

Figure S67 <sup>1</sup>H NMR spectrum of **8** (600 MHz, CDCl<sub>3</sub>)

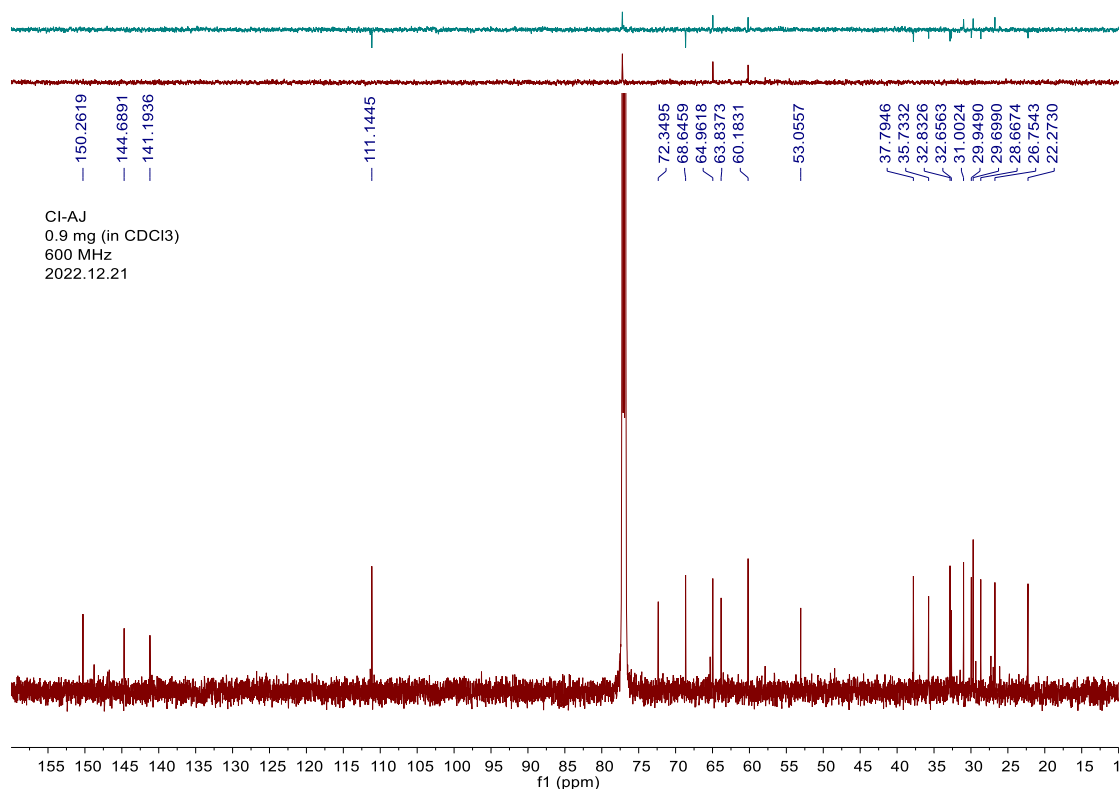

Figure S68 <sup>13</sup>C NMR spectrum of **8** (125 MHz, CDCl<sub>3</sub>)



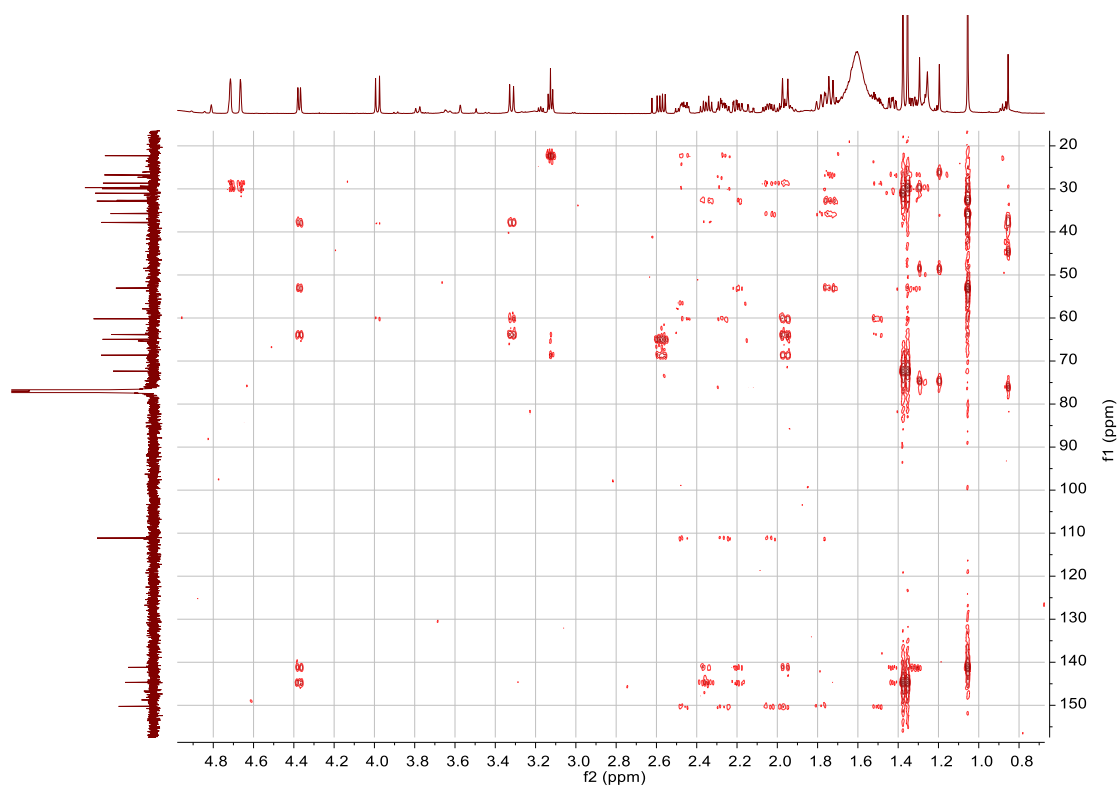

**Figure S71** HMBC spectrum of **8**

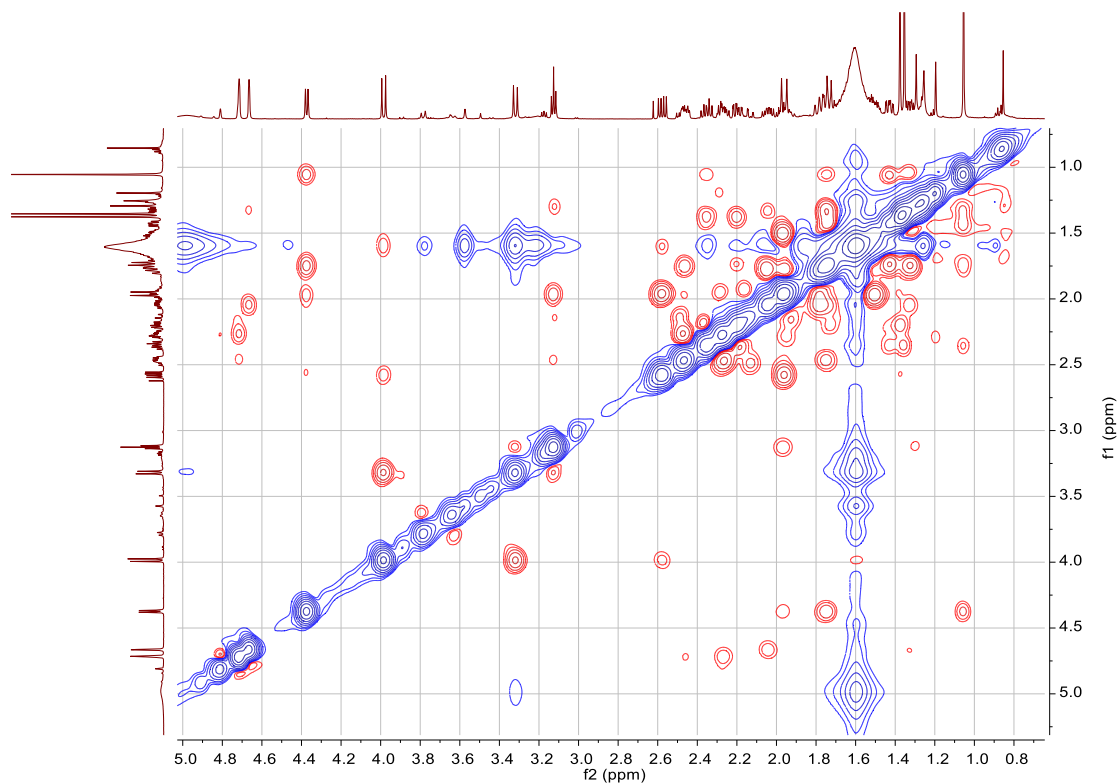

**Figure S72** NOESY spectrum of **8**

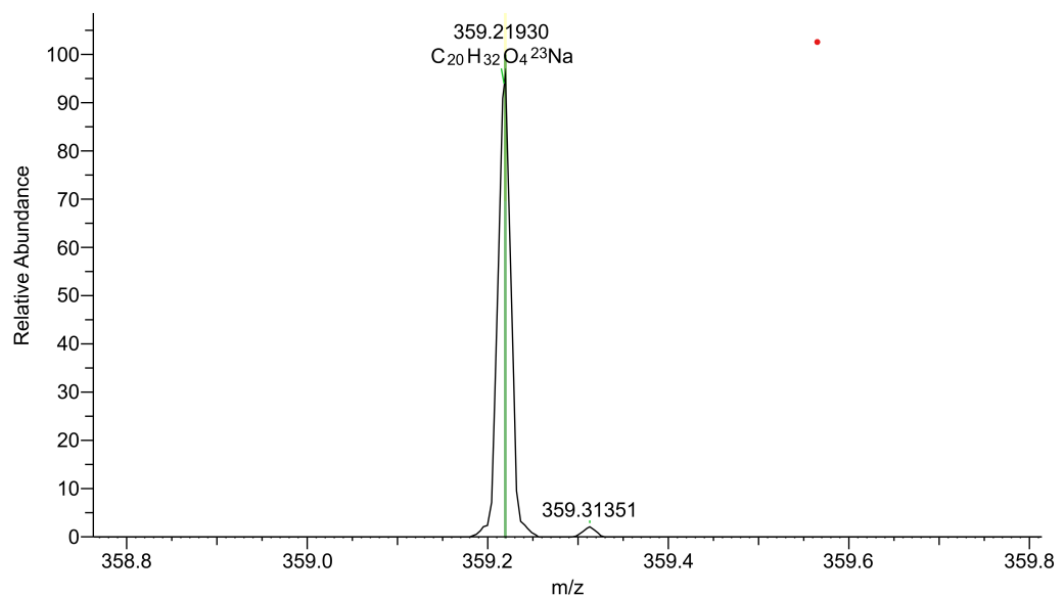

| Peak Mass | Display F...             | S Fit                    | RDB  | Delta [pp... | Theo. ma... | Rank | Combine... | # Match... | # Missed... | MS Cov.... | Pattern C... | MSMS M...        |
|-----------|--------------------------|--------------------------|------|--------------|-------------|------|------------|------------|-------------|------------|--------------|------------------|
| 359.21930 | $C_{20}H_{32}O_4^{23}Na$ | 28.05782<br>2993545<br>7 | 4.50 | 0.05         | 359.21928   | 1    | 91.38      | 2          | 2           | 94.9       | 97.28        | (Collecti<br>on) |

**Figure S73** HRESIMS spectrum of **8**

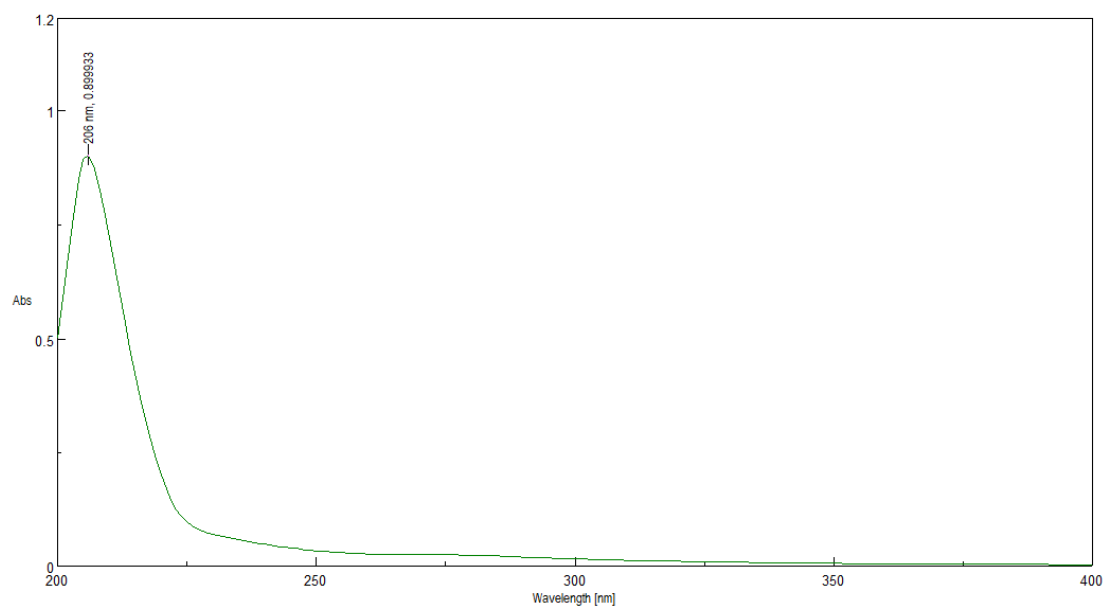

**Figure S74 UV spectrum of 8**

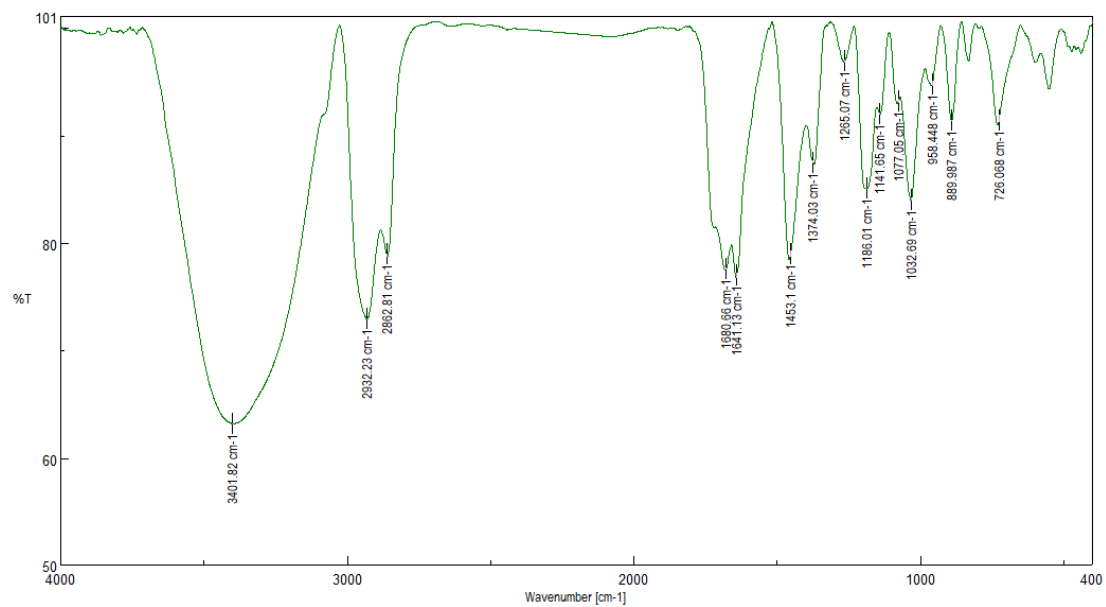

**Figure S75 IR spectrum of 8**
